# Supplementary material for: To boldly go where no microRNAs have gone before: Spaceflight impact on risk for small-for-gestational-age infants
Source: Research Square preprint supplement (doi:10.21203/rs.3.rs-4003363/v1), 2024-04-22
Supplement: Supplementary file 1 [file 009700e4e0b9a734bf7c35f9.xlsx]

## Sheet: Sheet1
miRNA_name	miRNA	CID	probability	pert_iname	Common	clinical_phase	moa	Common	target	disease_area	indication
hsa-let-7b-5p	MIMAT0000063	31307	0.0659158	triamcinolone	10	Launched	glucocorticoid receptor agonist	65	NR3C1	dermatology	corticosteroid-responsive dermatoses
hsa-let-7b-5p	MIMAT0000063	9386	0.147451	perfluorodecalin	10	Launched		0		dermatology	cosmetic
hsa-let-7b-5p	MIMAT0000063	5288149	0.0725674	seocalcitol	9	Phase 3	vitamin D receptor agonist	77	VDR
hsa-let-7b-5p	MIMAT0000063	261004	0.143794	arsenic-trioxide	9	Launched	apoptosis stimulant	21	AKT1|CCND1|IKBKB|JUN|MAPK1|MAPK3|TXNRD1	gastroenterology	diarrhea
hsa-let-7b-5p	MIMAT0000063	66414	0.205768	2-methoxyestradiol	9	Phase 2	hypoxia inducible factor inhibitor	9	COMT|CYP19A1|CYP1A1|CYP1B1|HIF1A|TUBB
hsa-let-7b-5p	MIMAT0000063	60198	0.183863	exemestane	9	Launched	aromatase inhibitor	9	CYP19A1	oncology	breast cancer
hsa-let-7b-5p	MIMAT0000063	168049	0.10776	C11-Acetate	9	Phase 3		0	ABAT|ACE|AKR1C3|CA2|CELA1|ESR2|FFAR2|FFAR3|HPRT1|LTA4H|MMP12|NOS1|NOS3|PLA2G1B|PTPN1|SOD1|TXN
hsa-let-7b-5p	MIMAT0000063	68929	0.194411	epiestriol	9	Preclinical		0
hsa-let-7b-5p	MIMAT0000063	9547243	0.0750259	ercalcitriol	9	Phase 1	vitamin D receptor agonist	77	VDR
hsa-let-7b-5p	MIMAT0000063	5283731	0.0695014	calcifediol	8	Launched	vitamin D receptor agonist	77	VDR	endocrinology	hyperparathyroidism
hsa-let-7b-5p	MIMAT0000063	5281104	0.0663404	paricalcitol	8	Launched	vitamin D receptor agonist	77	VDR	nephrology|endocrinology	chronic kidney disease (CKD)|hyperthyroidism
hsa-let-7b-5p	MIMAT0000063	25068278	0.0659266	17-PA	8	Preclinical	glucocorticoid receptor agonist	65
hsa-let-7b-5p	MIMAT0000063	2577	0.087007	carmofur	8	Launched	thymidylate synthase inhibitor	15	TYMS	oncology	breast cancer|colorectal cancer
hsa-let-7b-5p	MIMAT0000063	223997	0.150958	adrenosterone	8	Preclinical	11-beta hydroxysteroid dehydrogenase inhibitor	9	HSD11B1|HSD11B2
hsa-let-7b-5p	MIMAT0000063	73415769	0.0884484	bismuth-subgallate	8	Launched	nitric oxide synthase inhibitor	8	NOS1	gastroenterology	internal deoderant
hsa-let-7b-5p	MIMAT0000063	154272	0.0763183	10-deacetylbaccatin	8	Preclinical	antitumor agent	8
hsa-let-7b-5p	MIMAT0000063	5284500	0.0665925	camphor-(1R)	8	Phase 1	TRPV activator	8	TRPV1
hsa-let-7b-5p	MIMAT0000063	1174	0.270239	uracil	8	Launched		0	DPYD|UCKL1
hsa-let-7b-5p	MIMAT0000063	5756	0.172455	estriol	7	Launched	estrogen receptor agonist	33	ESR1|ESR2	endocrinology|obstetrics/gynecology|infectious disease	menopause|vaginal atrophy|urinary tract infections
hsa-let-7b-5p	MIMAT0000063	3994	0.0711347	M-344	7	Preclinical	HDAC inhibitor	22	HDAC8
hsa-let-7b-5p	MIMAT0000063	5881	0.108805	dehydroepiandrosterone	7	Launched	protein synthesis stimulant	10	ESR1|ESR2|G6PD|GABRA1|GABRA2|GABRA3|GABRA4|GABRA5|GABRA6|GABRB1|GABRB2|GABRB3|GABRD|GABRE|GABRG1|GABRG2|GABRG3|GABRP|GABRQ|GRIN1|GRIN2A|GRIN2B|GRIN2C|GRIN2D|GRIN3A|GRIN3B|HSD17B1|NR1I2|NR1I3|PPARA|SIGMAR1|SULT2A1|SULT2B1	endocrinology	menopause
hsa-let-7b-5p	MIMAT0000063	27125	0.0793805	estetrol	7	Phase 3	selective estrogen receptor modulator (SERM)	10	ESR1
hsa-let-7b-5p	MIMAT0000063	5870	0.214135	estrone	7	Launched	estrogen receptor agonist|estrogenic hormone	9	ESR1|ESR2	endocrinology	menopause
hsa-let-7b-5p	MIMAT0000063	10044	0.069674	triptan	7	Phase 1	serotonin receptor agonist	8	HTR1B|HTR1D
hsa-let-7b-5p	MIMAT0000063	86820626	0.253028	cisplatin	7	Launched	DNA alkylating agent|DNA synthesis inhibitor	7	XIAP	oncology	testicular carcinoma|ovarian cancer|bladder cancer
hsa-let-7b-5p	MIMAT0000063	6256	0.126456	trifluridine	7	Launched	DNA directed DNA polymerase inhibitor|thymidylate synthase inhibitor	7	TYMS	infectious disease	virus herpes simplex (HSV)
hsa-let-7b-5p	MIMAT0000063	88113319	0.0695314	citric-acid	7	Preclinical	coagulation factor inhibitor	7	AKR1B1|ANG|APRT|BHMT|C8G|CA4|CPB1|CS|CTDSP1|GNMT|HGS|HS3ST3A1|IL4I1|ITPA|LSM6|MDH2|MIF|PDE5A|PKD2L1|PLEKHA1|RNASE1|RNASE3|SRC|TNFSF13B|UCK2
hsa-let-7b-5p	MIMAT0000063	442514	0.0697167	hematoxylin	7	Preclinical		0
hsa-let-7b-5p	MIMAT0000063	13711	0.0657854	torcitabine	6	Phase 2	DNA polymerase inhibitor	17	DCK|TK2
hsa-let-7b-5p	MIMAT0000063	68684	0.10665	clanfenur	6	Preclinical	anticancer agent	11
hsa-let-7b-5p	MIMAT0000063	94141	0.101413	NPC-01	6	Phase 3	steroid	11
hsa-let-7b-5p	MIMAT0000063	5790	0.153707	floxuridine	6	Launched	DNA synthesis inhibitor	10	TYMS	oncology	colorectal cancer
hsa-let-7b-5p	MIMAT0000063	5054	0.064758	resorcinol	6	Launched	phosphodiesterase inhibitor	8	CA12|CA14|CA2|PTGS1	dermatology	acne vulgaris (AV)|eczema|psoriasis|seborrheic dermatitis
hsa-let-7b-5p	MIMAT0000063	515328	0.186446	fdcyd	6	Phase 2	DNA methyltransferase inhibitor	7
hsa-let-7b-5p	MIMAT0000063	43157	0.132358	eniluracil	6	Phase 3	dihydropyrimidine dehydrogenase inhibitor	6	AOX1|DPYD|XDH
hsa-let-7b-5p	MIMAT0000063	446098	0.0681936	2-fluorofucose	6	Phase 1		0
hsa-let-7b-5p	MIMAT0000063	159055	0.0698325	camphor-(+)	6	Phase 2		0
hsa-let-7b-5p	MIMAT0000063	9878	0.0769008	fluorometholone	5	Launched	glucocorticoid receptor agonist	65	NR3C1	ophthalmology	eye inflammation
hsa-let-7b-5p	MIMAT0000063	41097932	0.200222	equilin	5	Preclinical	estrogen receptor agonist	33	HSD17B1
hsa-let-7b-5p	MIMAT0000063	73581	0.0763867	bilobalide	5	Preclinical	GABA receptor modulator	11	GLRA1|GLRA2|GLRB|HTR3A|HTR3B
hsa-let-7b-5p	MIMAT0000063	56208	0.233395	sarafloxacin	5	Launched	bacterial DNA gyrase inhibitor	10		infectious disease	gram-negative bacterial infections|gram-positive bacterial infections
hsa-let-7b-5p	MIMAT0000063	6481236	0.170287	PSI-6130	5	Phase 1	RNA polymerase inhibitor	10
hsa-let-7b-5p	MIMAT0000063	124605168	0.0689641	bruceantin	5	Phase 2	protein synthesis inhibitor	7
hsa-let-7b-5p	MIMAT0000063	6466	0.0796004	MD-920	5	Phase 1	NFkB pathway inhibitor	6	AADACL2
hsa-let-7b-5p	MIMAT0000063	66377	0.0695131	edoxudine	5	Launched	DNA directed DNA polymerase inhibitor	6		infectious disease	virus herpes simplex (HSV)
hsa-let-7b-5p	MIMAT0000063	73554252	0.202544	carboplatin	5	Launched	DNA alkylating agent|DNA inhibitor	5		oncology	ovarian cancer
hsa-let-7b-5p	MIMAT0000063	33039	0.120524	alovudine	5	Phase 2	DNA synthesis marker	5
hsa-let-7b-5p	MIMAT0000063	86582336	0.0782459	BMS-986142	5	Phase 2	Bruton's tyrosine kinase (BTK) inhibitor	5
hsa-let-7b-5p	MIMAT0000063	64971	0.0698764	betulinic-acid	5	Phase 1/Phase 2	apoptosis stimulant|NFkB pathway inhibitor	5	GPBAR1
hsa-let-7b-5p	MIMAT0000063	10219606	0.062447	pinanediol	5	Preclinical		0
hsa-let-7b-5p	MIMAT0000063	36689751	0.0623696	tetroquinone	5	Preclinical		0
hsa-let-7b-5p	MIMAT0000063	71245042	0.0990913	AC-186	4	Preclinical	estrogen receptor agonist	33	ESR2
hsa-let-7b-5p	MIMAT0000063	71311876	0.129251	MC1568	4	Preclinical	HDAC inhibitor	22	HDAC2
hsa-let-7b-5p	MIMAT0000063	6185	0.0643497	K-strophanthidin	4	Phase 2	ATPase inhibitor	14	ATP1A1
hsa-let-7b-5p	MIMAT0000063	6918305	0.0635993	ganaxolone	4	Phase 3	GABA receptor modulator	11	GABRA1|GABRA2|GABRA3|GABRA4|GABRA5|GABRA6
hsa-let-7b-5p	MIMAT0000063	10205	0.0677054	plumbagin	4	Preclinical	anticancer agent	11
hsa-let-7b-5p	MIMAT0000063	3610	0.0654292	hexylresorcinol	4	Launched	local anesthetic	7	TYR	infectious disease	skin infections|first-aid antiseptic
hsa-let-7b-5p	MIMAT0000063	5329106	0.0638289	toceranib	4	Launched	protein tyrosine kinase inhibitor	7	FLT1|FLT3|KDR|PDGFRA|PDGFRB	oncology	cutaneous mast cell tumors
hsa-let-7b-5p	MIMAT0000063	9854073	0.0695598	cabazitaxel	4	Launched	microtubule inhibitor	6	TUBA1A|TUBA1B|TUBA1C|TUBA3C|TUBA3D|TUBA3E|TUBA4A|TUBB|TUBB1|TUBB2A|TUBB2B|TUBB3|TUBB4A|TUBB4B|TUBB6|TUBB8	oncology	prostate cancer
hsa-let-7b-5p	MIMAT0000063	4760	0.0846064	phenindione	4	Launched	vitamin K antagonist	5	VKORC1	hematology	deep vein thrombosis (DVT)
hsa-let-7b-5p	MIMAT0000063	230748	0.0726582	INCA-6	4	Preclinical	calcineurin inhibitor	5	NFATC1
hsa-let-7b-5p	MIMAT0000063	5321010	0.0780844	oridonin	4	Preclinical	BCL inhibitor	4	BCL2
hsa-let-7b-5p	MIMAT0000063	638015	0.0728229	retinaldehyde	4	Launched		0		dermatology	cosmetic
hsa-let-7b-5p	MIMAT0000063	2729042	0.0970663	TCID	4	Preclinical		0
hsa-let-7b-5p	MIMAT0000063	73115	0.170438	clevudine	3	Launched	DNA polymerase inhibitor	17		infectious disease	hepatitis B
hsa-let-7b-5p	MIMAT0000063	101498	0.116937	5-FP	3	Phase 1	thymidylate synthase inhibitor	15	TYMS
hsa-let-7b-5p	MIMAT0000063	492405	0.138817	favipiravir	3	Phase 3	RNA polymerase inhibitor	10
hsa-let-7b-5p	MIMAT0000063	16124	0.101273	medronic-acid	3	Launched	bone resorption inhibitor	6		radiology	skeletal imaging agent
hsa-let-7b-5p	MIMAT0000063	10041070	0.117807	altrenogest	3	Launched	progestogen hormone	3	PGR	endocrinology	estrus
hsa-let-7b-5p	MIMAT0000063	235905	0.0743286	allylestrenol	3	Launched	steroidal progestin	3	ESR1|PGR|SLC6A9	obstetrics/gynecology	premature labor
hsa-let-7b-5p	MIMAT0000063	442424	0.0721903	genipin	3	Preclinical	choleretic agent	3
hsa-let-7b-5p	MIMAT0000063	5280934	0.0651601	alpha-linolenic-acid	3	Phase 3	omega 3 fatty acid stimulant	3	ELOVL4|FADS1|FADS2|FFAR1|FFAR4|PTGS2|SLC8A1|TRPV1
hsa-let-7b-5p	MIMAT0000063	3001662	0.140194	schisandrol-B	3	Phase 3	lipid peroxidase inhibitor	3
hsa-let-7b-5p	MIMAT0000063	69605	0.083099	5-fluoropyrimidine	3	Phase 3	kinase inhibitor	3
hsa-let-7b-5p	MIMAT0000063	984	0.0740482	1-hexadecanal	3	Preclinical	sphingosine 1-phosphate receptor substrate	3	DBI|RHO
hsa-let-7b-5p	MIMAT0000063	14709	0.0717907	prasterone-acetate	3	Preclinical		0
hsa-let-7b-5p	MIMAT0000063	10477896	0.0674068	perfluorohexyloctane	3	Launched		0
hsa-let-7b-5p	MIMAT0000063	9976842	0.0685699	SR-11302	3	Preclinical		0
hsa-let-7b-5p	MIMAT0000063	9818306	0.11118	estradiol-acetate	2	Launched	estrogen receptor agonist	33	ESR1	endocrinology|obstetrics/gynecology	menopause|vaginal atrophy
hsa-let-7b-5p	MIMAT0000063	9883915	0.0746804	promestriene	2	Launched	estrogen receptor agonist	33	ESR1	endocrinology	androgenetic alopecia
hsa-let-7b-5p	MIMAT0000063	18343	0.0893942	doxifluridine	2	Launched	thymidylate synthase inhibitor	15	TYMS	oncology	colorectal cancer
hsa-let-7b-5p	MIMAT0000063	288216	0.083303	ftorafur	2	Launched	thymidylate synthase inhibitor	15	TYMS	oncology	colorectal cancer
hsa-let-7b-5p	MIMAT0000063	5994	0.0826793	progesterone	2	Launched	progesterone receptor agonist	11	CATSPER1|CATSPER2|CATSPER3|CATSPER4|CYP17A1|ESR1|NR3C2|OPRK1|PGR|TRPC5	obstetrics/gynecology|endocrinology	infertility|amenorrhea
hsa-let-7b-5p	MIMAT0000063	108059	0.0649825	segesterone-acetate	2	Launched	progesterone receptor agonist	11	PGR
hsa-let-7b-5p	MIMAT0000063	6603903	0.0824855	lomefloxacin	2	Launched	bacterial DNA gyrase inhibitor	10		infectious disease	respiratory tract infections|urinary tract infections
hsa-let-7b-5p	MIMAT0000063	10034073	0.0673442	fidaxomicin	2	Launched	RNA polymerase inhibitor	10		gastroenterology	diarrhea
hsa-let-7b-5p	MIMAT0000063	50312	0.0752001	fiacitabine	2	Phase 2	DNA synthesis inhibitor	10
hsa-let-7b-5p	MIMAT0000063	3366	0.250585	flucytosine	2	Launched	other antifungal	7	DNMT1	infectious disease	bacterial septicemia|endocarditis|urinary tract infections|meningitis
hsa-let-7b-5p	MIMAT0000063	21626088	0.0746562	cis-exo-camphanediol-2,3	2	Phase 1	nitric oxide stimulant	3	NOS3
hsa-let-7b-5p	MIMAT0000063	3059	0.0663639	diflunisal	2	Launched	prostanoid receptor antagonist	3	PTGS1|PTGS2	rheumatology	rheumatoid arthritis|osteoarthritis
hsa-let-7b-5p	MIMAT0000063	785	0.0660406	hydroquinone	2	Launched	melanin inhibitor	3	TYR	dermatology	dyschromia
hsa-let-7b-5p	MIMAT0000063	222757	0.109789	estradiol-benzoate	2	Preclinical	contraceptive agent	2	ESR1
hsa-let-7b-5p	MIMAT0000063	92043331	0.0993514	ferroquine	2	Phase 2	antimalarial agent	2
hsa-let-7b-5p	MIMAT0000063	10341154	0.0932611	VX-702	2	Phase 2	p38 MAPK inhibitor	2	IL1B|IL6|MAPK11|MAPK12|MAPK14|TNF
hsa-let-7b-5p	MIMAT0000063	37873	0.0728642	2-oxopropanoate	2	Preclinical	pyruvate dehydrogenase kinase inhibitor	2	ABAT
hsa-let-7b-5p	MIMAT0000063	59397065	0.0726807	GNF-5837	2	Preclinical	growth factor receptor inhibitor	2	NTRK1|NTRK2|NTRK3
hsa-let-7b-5p	MIMAT0000063	9828310	0.0681674	gemcitabine-elaidate	2	Phase 1	apoptosis inhibitor|DNA synthesis inhibitor	2	CMPK1|RRM1|TYMS
hsa-let-7b-5p	MIMAT0000063	11646777	0.068058	LY2334737	2	Phase 1	antitumor agent|ribonucleotide reductase inhibitor	2
hsa-let-7b-5p	MIMAT0000063	44249042	0.0652854	TMN-355	2	Preclinical	cyclophilin inhibitor	2	PPIA
hsa-let-7b-5p	MIMAT0000063	43805	0.205042	oxaliplatin	2	Launched	DNA inhibitor	2		oncology	colorectal cancer
hsa-let-7b-5p	MIMAT0000063	446541	0.0821827	mycophenolic-acid	2	Launched	dehydrogenase inhibitor|inositol monophosphatase inhibitor	2	IMPDH1|IMPDH2	transplant	organ rejection
hsa-let-7b-5p	MIMAT0000063	643460	0.0714641	sorbic-acid	2	Launched		0
hsa-let-7b-5p	MIMAT0000063	92730	0.0699144	stetaderm	2	Launched		0
hsa-let-7b-5p	MIMAT0000063	417214	0.06288	sodium-orthovanadate	2	Preclinical		0
hsa-let-7b-5p	MIMAT0000063	13791	0.0937022	estradiol-valerate	1	Launched	estrogen receptor agonist	33	ESR1	oncology|endocrinology|obstetrics/gynecology	prostate cancer|hypoestrogenism|menopause|vaginal atrophy
hsa-let-7b-5p	MIMAT0000063	9403	0.078056	estradiol-cypionate	1	Launched	estrogen receptor agonist	33	ESR1	endocrinology	hypoestrogenism|menopause
hsa-let-7b-5p	MIMAT0000063	174277	0.0754858	schisandrin-B	1	Preclinical	antioxidant	27	ATR
hsa-let-7b-5p	MIMAT0000063	452548	0.0771306	teniposide	1	Launched	topoisomerase inhibitor	13	TOP2A|TOP2B	hematologic malignancy	acute lymphoblastic leukemia (ALL)
hsa-let-7b-5p	MIMAT0000063	9850038	0.121246	nadifloxacin	1	Launched	bacterial DNA gyrase inhibitor	10		dermatology|infectious disease	acne vulgaris (AV)|skin infections
hsa-let-7b-5p	MIMAT0000063	488360	0.10018	tosufloxacin	1	Launched	bacterial DNA gyrase inhibitor	10		infectious disease	gram-negative bacterial infections
hsa-let-7b-5p	MIMAT0000063	72307	0.0773133	sesamin	1	Preclinical	NFkB pathway inhibitor	6
hsa-let-7b-5p	MIMAT0000063	135411	0.0835911	CD-437	1	Preclinical	retinoid receptor agonist	5	RARG
hsa-let-7b-5p	MIMAT0000063	92337	0.0759481	flurbiprofen-(+/-)	1	Launched	cyclooxygenase inhibitor	5		rheumatology	rheumatoid arthritis|osteoarthritis
hsa-let-7b-5p	MIMAT0000063	9952709	0.0716387	CD-1530	1	Preclinical	retinoid receptor agonist	5	RARG
hsa-let-7b-5p	MIMAT0000063	72099	0.0705659	flurbiprofen-(S)-(+)	1	Launched	cyclooxygenase inhibitor	5	PTGS1|PTGS2	rheumatology	rheumatoid arthritis|osteoarthritis
hsa-let-7b-5p	MIMAT0000063	2197	0.0656295	anisindione	1	Launched	vitamin K antagonist	5	GGCX	hematology	deep vein thrombosis (DVT)
hsa-let-7b-5p	MIMAT0000063	5794	0.0644811	piperonyl-butoxide	1	Launched	cytochrome P450 inhibitor	4		infectious disease	lice
hsa-let-7b-5p	MIMAT0000063	9904854	0.0630804	R112	1	Phase 1	SYK inhibitor	3	SYK
hsa-let-7b-5p	MIMAT0000063	11960271	0.102439	APTO-253	1	Phase 1	krÃ¼ppel-like factor expression enhancer	1	KLF4
hsa-let-7b-5p	MIMAT0000063	11242315	0.102089	RX-3117	1	Phase 1/Phase 2	CDK inhibitor|DNA synthesis inhibitor	1	CDK2|DNMT1
hsa-let-7b-5p	MIMAT0000063	9554	0.0775457	ammonium-perfluorocaprylate	1	Phase 1	Pim kinase inhibitor	1	PIM1
hsa-let-7b-5p	MIMAT0000063	9871594	0.0751099	PD-156707	1	Preclinical	endothelin receptor antagonist	1	EDNRA|EDNRB
hsa-let-7b-5p	MIMAT0000063	9458	0.0721969	triflusal	1	Launched	cyclooxygenase inhibitor|platelet aggregation inhibitor|thromboxane synthase inhibitor	1	NFKB1|NOS2|PDE10A|PTGS1	neurology/psychiatry|cardiology	stroke|myocardial infarction|atrial fibrillation (AF)
hsa-let-7b-5p	MIMAT0000063	57300161	0.0699372	fulvestrant	1	Launched	estrogen receptor antagonist	1	ESR1|ESR2|GPER1	oncology	breast cancer
hsa-let-7b-5p	MIMAT0000063	5206	0.0680517	sevoflurane	1	Launched	membrane integrity inhibitor	1	ATP2C1|ATP5D|GABRA1|GABRA2|GABRA3|GABRA4|GABRA5|GABRA6|GABRB1|GABRB2|GABRB3|GABRD|GABRE|GABRG1|GABRG2|GABRG3|GABRP|GABRQ|GLRA1|GLRB|GRIA1|KCNA1|KCNK10|KCNK18|KCNK2|KCNK3|KCNK9|MT-ND1	neurology/psychiatry	anesthetic
hsa-let-7b-5p	MIMAT0000063	10313098	0.0830388	ammonium-lactate	1	Launched		0	HCAR1	dermatology	xerosis cutis|ichthyosis vulgaris
hsa-let-7b-5p	MIMAT0000063	108213	0.0759917	bifendate	1	Launched		0		infectious disease	hepatitis B|hepatitis C
hsa-let-7b-5p	MIMAT0000063	71621663	0.0627511	ALS-8112	1	Phase 1		0
hsa-miR-106b-5p	MIMAT0000680	31307	0.0490453	triamcinolone	10	Launched	glucocorticoid receptor agonist	65	NR3C1	dermatology	corticosteroid-responsive dermatoses
hsa-miR-106b-5p	MIMAT0000680	9386	0.143977	perfluorodecalin	10	Launched		0		dermatology	cosmetic
hsa-miR-106b-5p	MIMAT0000680	5288149	0.0773996	seocalcitol	9	Phase 3	vitamin D receptor agonist	77	VDR
hsa-miR-106b-5p	MIMAT0000680	16490	0.063844	flumethasone	9	Launched	glucocorticoid receptor agonist	65	NR3C1|PLA2G1B	otolaryngology|infectious disease|dermatology	otitis|ear infections|corticosteroid-responsive dermatoses
hsa-miR-106b-5p	MIMAT0000680	261004	0.0478728	arsenic-trioxide	9	Launched	apoptosis stimulant	21	AKT1|CCND1|IKBKB|JUN|MAPK1|MAPK3|TXNRD1	gastroenterology	diarrhea
hsa-miR-106b-5p	MIMAT0000680	66414	0.0997442	2-methoxyestradiol	9	Phase 2	hypoxia inducible factor inhibitor	9	COMT|CYP19A1|CYP1A1|CYP1B1|HIF1A|TUBB
hsa-miR-106b-5p	MIMAT0000680	60198	0.080901	exemestane	9	Launched	aromatase inhibitor	9	CYP19A1	oncology	breast cancer
hsa-miR-106b-5p	MIMAT0000680	168049	0.124695	C11-Acetate	9	Phase 3		0	ABAT|ACE|AKR1C3|CA2|CELA1|ESR2|FFAR2|FFAR3|HPRT1|LTA4H|MMP12|NOS1|NOS3|PLA2G1B|PTPN1|SOD1|TXN
hsa-miR-106b-5p	MIMAT0000680	68929	0.0575398	epiestriol	9	Preclinical		0
hsa-miR-106b-5p	MIMAT0000680	9547243	0.0944141	ercalcitriol	9	Phase 1	vitamin D receptor agonist	77	VDR
hsa-miR-106b-5p	MIMAT0000680	5283731	0.117533	calcifediol	8	Launched	vitamin D receptor agonist	77	VDR	endocrinology	hyperparathyroidism
hsa-miR-106b-5p	MIMAT0000680	5282190	0.0682563	falecalcitriol	8	Launched	vitamin D receptor agonist	77	VDR	endocrinology	hyperparathyroidism
hsa-miR-106b-5p	MIMAT0000680	5281104	0.0874527	paricalcitol	8	Launched	vitamin D receptor agonist	77	VDR	nephrology|endocrinology	chronic kidney disease (CKD)|hyperthyroidism
hsa-miR-106b-5p	MIMAT0000680	25068278	0.0637949	17-PA	8	Preclinical	glucocorticoid receptor agonist	65
hsa-miR-106b-5p	MIMAT0000680	5281243	0.137473	lutein	8	Launched	antioxidant	27		ophthalmology	macular degeneration|cataracts|retinitis pigmentosa (RP)
hsa-miR-106b-5p	MIMAT0000680	5281224	0.0714818	astaxanthin	8	Launched	antioxidant	27
hsa-miR-106b-5p	MIMAT0000680	159269	0.0888234	telbivudine	8	Launched	DNA polymerase inhibitor	17		infectious disease	hepatitis B
hsa-miR-106b-5p	MIMAT0000680	2577	0.0862387	carmofur	8	Launched	thymidylate synthase inhibitor	15	TYMS	oncology	breast cancer|colorectal cancer
hsa-miR-106b-5p	MIMAT0000680	854498	0.0831548	sobrepin	8	Launched	mucolytic agent	8		pulmonary	chest congestion
hsa-miR-106b-5p	MIMAT0000680	6439522	0.125407	tapinarof	8	Phase 3	aryl hydrocarbon receptor agonist	8
hsa-miR-106b-5p	MIMAT0000680	72326	0.0902241	NSC-4644	8	Phase 2	ACAT inhibitor|sterol regulatory element binding protein (SREBP) inhibitor	8	PYGM
hsa-miR-106b-5p	MIMAT0000680	154272	0.0708963	10-deacetylbaccatin	8	Preclinical	antitumor agent	8
hsa-miR-106b-5p	MIMAT0000680	5284500	0.0676015	camphor-(1R)	8	Phase 1	TRPV activator	8	TRPV1
hsa-miR-106b-5p	MIMAT0000680	5288845	0.083677	hexylene-glycol	8	Preclinical		0	AKR1C3|CTPS1|DLG4|HSP90AA1|NOS3|PGF|PLA2G1B|PTPN1|SELP
hsa-miR-106b-5p	MIMAT0000680	1174	0.22349	uracil	8	Launched		0	DPYD|UCKL1
hsa-miR-106b-5p	MIMAT0000680	46931009	0.134124	doxercalciferol	7	Launched	vitamin D receptor agonist	77	VDR	nephrology|endocrinology	chronic kidney disease (CKD)|hyperparathyroidism
hsa-miR-106b-5p	MIMAT0000680	5282181	0.122688	alfacalcidol	7	Launched	vitamin D receptor agonist	77	CYP27B1|VDR	endocrinology	vitamin D deficiency
hsa-miR-106b-5p	MIMAT0000680	5288783	0.0741788	calcipotriol	7	Launched	vitamin D receptor agonist	77	VDR	dermatology	psoriasis
hsa-miR-106b-5p	MIMAT0000680	5865	0.0499679	prednisone	7	Launched	glucocorticoid receptor agonist	65	HSD11B1|NR3C1	endocrinology|rheumatology|infectious disease|dermatology|ophthalmology|hematology|gastroenterology|neurology/psychiatry	congenital adrenal hyperplasia|hypercalcemia|rheumatoid arthritis|psoriatic arthritis|ankylosing spondylitis|bursitis|osteoarthritis|epicondylitis|dermatomyositis|psoriasis|mycosis|conjunctivitis|anemia|ulcerative colitis|enteritis|multiple sclerosis|meningitis
hsa-miR-106b-5p	MIMAT0000680	667476	0.1926	dienestrol	7	Launched	estrogen receptor agonist	33	ESR1	endocrinology	menopause
hsa-miR-106b-5p	MIMAT0000680	5756	0.0483285	estriol	7	Launched	estrogen receptor agonist	33	ESR1|ESR2	endocrinology|obstetrics/gynecology|infectious disease	menopause|vaginal atrophy|urinary tract infections
hsa-miR-106b-5p	MIMAT0000680	3994	0.129185	M-344	7	Preclinical	HDAC inhibitor	22	HDAC8
hsa-miR-106b-5p	MIMAT0000680	6918391	0.0628019	beta-elemene	7	Launched	apoptosis stimulant	21	MMP2|MMP9
hsa-miR-106b-5p	MIMAT0000680	27125	0.0665982	estetrol	7	Phase 3	selective estrogen receptor modulator (SERM)	10	ESR1
hsa-miR-106b-5p	MIMAT0000680	5881	0.0631786	dehydroepiandrosterone	7	Launched	protein synthesis stimulant	10	ESR1|ESR2|G6PD|GABRA1|GABRA2|GABRA3|GABRA4|GABRA5|GABRA6|GABRB1|GABRB2|GABRB3|GABRD|GABRE|GABRG1|GABRG2|GABRG3|GABRP|GABRQ|GRIN1|GRIN2A|GRIN2B|GRIN2C|GRIN2D|GRIN3A|GRIN3B|HSD17B1|NR1I2|NR1I3|PPARA|SIGMAR1|SULT2A1|SULT2B1	endocrinology	menopause
hsa-miR-106b-5p	MIMAT0000680	5870	0.0509061	estrone	7	Launched	estrogen receptor agonist|estrogenic hormone	9	ESR1|ESR2	endocrinology	menopause
hsa-miR-106b-5p	MIMAT0000680	192197	0.154913	hexestrol	7	Launched	synthetic estrogen	8	AKR1C1|ESR1|ESR2	endocrinology	hypoestrogenism
hsa-miR-106b-5p	MIMAT0000680	10044	0.0994143	triptan	7	Phase 1	serotonin receptor agonist	8	HTR1B|HTR1D
hsa-miR-106b-5p	MIMAT0000680	5280793	0.136364	ergocalciferol	7	Launched	vitamin analog	7	VDR	endocrinology|orthopedics	hypoparathyroidism|rickets|hypophosphatemia
hsa-miR-106b-5p	MIMAT0000680	6256	0.0948641	trifluridine	7	Launched	DNA directed DNA polymerase inhibitor|thymidylate synthase inhibitor	7	TYMS	infectious disease	virus herpes simplex (HSV)
hsa-miR-106b-5p	MIMAT0000680	86820626	0.0679874	cisplatin	7	Launched	DNA alkylating agent|DNA synthesis inhibitor	7	XIAP	oncology	testicular carcinoma|ovarian cancer|bladder cancer
hsa-miR-106b-5p	MIMAT0000680	88113319	0.0558597	citric-acid	7	Preclinical	coagulation factor inhibitor	7	AKR1B1|ANG|APRT|BHMT|C8G|CA4|CPB1|CS|CTDSP1|GNMT|HGS|HS3ST3A1|IL4I1|ITPA|LSM6|MDH2|MIF|PDE5A|PKD2L1|PLEKHA1|RNASE1|RNASE3|SRC|TNFSF13B|UCK2
hsa-miR-106b-5p	MIMAT0000680	5280489	0.0748029	beta-carotene	7	Launched		0
hsa-miR-106b-5p	MIMAT0000680	5283748	0.0797065	secalciferol	6	Launched	vitamin D receptor agonist	77	VDR	critical care	bone fracture
hsa-miR-106b-5p	MIMAT0000680	13711	0.0816962	torcitabine	6	Phase 2	DNA polymerase inhibitor	17	DCK|TK2
hsa-miR-106b-5p	MIMAT0000680	68684	0.0826123	clanfenur	6	Preclinical	anticancer agent	11
hsa-miR-106b-5p	MIMAT0000680	5790	0.11871	floxuridine	6	Launched	DNA synthesis inhibitor	10	TYMS	oncology	colorectal cancer
hsa-miR-106b-5p	MIMAT0000680	5054	0.0633549	resorcinol	6	Launched	phosphodiesterase inhibitor	8	CA12|CA14|CA2|PTGS1	dermatology	acne vulgaris (AV)|eczema|psoriasis|seborrheic dermatitis
hsa-miR-106b-5p	MIMAT0000680	515328	0.0883448	fdcyd	6	Phase 2	DNA methyltransferase inhibitor	7
hsa-miR-106b-5p	MIMAT0000680	4091	0.0852411	metformin	6	Launched	insulin sensitizer	6	ACACB|PRKAB1	endocrinology	diabetes mellitus
hsa-miR-106b-5p	MIMAT0000680	4055	0.0575466	menadione	6	Launched	mitochondrial DNA polymerase inhibitor|phosphatase inhibitor	6	AOX1|BGLAP|F10|F2|F7|F9|GGCX|NQO1|NQO2|PROC|PROS1|PROZ|VKORC1|VKORC1L1	gastroenterology|neurology/psychiatry|dermatology|rheumatology	ulcerative colitis|diarrhea|headache|varicose veins|rheumatoid arthritis
hsa-miR-106b-5p	MIMAT0000680	9062	0.0564959	2-deoxyglucose	6	Phase 2	glycolysis inhibitor	6	SLC2A1|SLC2A2|SLC2A3|SLC2A4
hsa-miR-106b-5p	MIMAT0000680	43157	0.0805342	eniluracil	6	Phase 3	dihydropyrimidine dehydrogenase inhibitor	6	AOX1|DPYD|XDH
hsa-miR-106b-5p	MIMAT0000680	440917	0.0698954	D-limonene	6	Phase 1		0
hsa-miR-106b-5p	MIMAT0000680	7057924	0.103768	2-ethyl-1,3-hexanediol	6	Preclinical		0
hsa-miR-106b-5p	MIMAT0000680	446098	0.0505135	2-fluorofucose	6	Phase 1		0
hsa-miR-106b-5p	MIMAT0000680	11332752	0.0504417	shikimic-acid	6	Preclinical		0
hsa-miR-106b-5p	MIMAT0000680	159055	0.0509594	camphor-(+)	6	Phase 2		0
hsa-miR-106b-5p	MIMAT0000680	6398761	0.0983491	maxacalcitol	5	Launched	vitamin D receptor agonist	77	VDR	endocrinology	hyperparathyroidism
hsa-miR-106b-5p	MIMAT0000680	6741	0.0619929	methylprednisolone	5	Launched	glucocorticoid receptor agonist	65	NR3C1	endocrinology|rheumatology|dermatology|infectious disease|allergy|hematology|neurology/psychiatry|gastroenterology	hypercalcemia|thyroiditis|ankylosing spondylitis|bursitis|osteoarthritis|psoriatic arthritis|seborrheic dermatitis|mycosis|allergic rhinitis|psoriasis|anemia|multiple sclerosis|ulcerative colitis|enteritis
hsa-miR-106b-5p	MIMAT0000680	73581	0.0478522	bilobalide	5	Preclinical	GABA receptor modulator	11	GLRA1|GLRA2|GLRB|HTR3A|HTR3B
hsa-miR-106b-5p	MIMAT0000680	6481236	0.0547832	PSI-6130	5	Phase 1	RNA polymerase inhibitor	10
hsa-miR-106b-5p	MIMAT0000680	124605168	0.0688285	bruceantin	5	Phase 2	protein synthesis inhibitor	7
hsa-miR-106b-5p	MIMAT0000680	61041	0.0791942	safranal	5	Phase 2	benzodiazepine receptor agonist	7	GABBR1
hsa-miR-106b-5p	MIMAT0000680	66377	0.0863345	edoxudine	5	Launched	DNA directed DNA polymerase inhibitor	6		infectious disease	virus herpes simplex (HSV)
hsa-miR-106b-5p	MIMAT0000680	6466	0.0703867	MD-920	5	Phase 1	NFkB pathway inhibitor	6	AADACL2
hsa-miR-106b-5p	MIMAT0000680	6431152	0.0691616	elemene	5	Phase 3	VEGFR inhibitor	5
hsa-miR-106b-5p	MIMAT0000680	11213350	0.0786906	S-111	5	Phase 2	PARP inhibitor	5	PARP1
hsa-miR-106b-5p	MIMAT0000680	33039	0.0632705	alovudine	5	Phase 2	DNA synthesis marker	5
hsa-miR-106b-5p	MIMAT0000680	86582336	0.0703241	BMS-986142	5	Phase 2	Bruton's tyrosine kinase (BTK) inhibitor	5
hsa-miR-106b-5p	MIMAT0000680	64971	0.056304	betulinic-acid	5	Phase 1/Phase 2	apoptosis stimulant|NFkB pathway inhibitor	5	GPBAR1
hsa-miR-106b-5p	MIMAT0000680	5146	0.0826694	salicyl-alcohol	5	Preclinical		0
hsa-miR-106b-5p	MIMAT0000680	56842011	0.0756344	sclareol	5	Preclinical		0
hsa-miR-106b-5p	MIMAT0000680	11468733	0.0675077	hemomex-s	5	Launched		0	PPARG
hsa-miR-106b-5p	MIMAT0000680	14240392	0.0581187	curcumol	4	Phase 1	JAK inhibitor	7	JAK1|JAK2|JAK3
hsa-miR-106b-5p	MIMAT0000680	3610	0.0556787	hexylresorcinol	4	Launched	local anesthetic	7	TYR	infectious disease	skin infections|first-aid antiseptic
hsa-miR-106b-5p	MIMAT0000680	6918141	0.087821	eldecalcitol	4	Phase 3	bone formation stimulant	4	VDR
hsa-miR-106b-5p	MIMAT0000680	21584481	0.0909201	DMSO	4	Preclinical	control vehicle	4
hsa-miR-106b-5p	MIMAT0000680	444679	0.056378	ergosterol	4	Preclinical	vitamin D precursor	4
hsa-miR-106b-5p	MIMAT0000680	5321010	0.127978	oridonin	4	Preclinical	BCL inhibitor	4	BCL2
hsa-miR-106b-5p	MIMAT0000680	2729042	0.0483876	TCID	4	Preclinical		0
hsa-miR-106b-5p	MIMAT0000680	5280453	0.0845638	calcitriol	3	Launched	vitamin D receptor agonist	77	VDR	endocrinology|orthopedics	hypocalcemia|hypoparathyroidism|osteoporosis
hsa-miR-106b-5p	MIMAT0000680	53340666	0.109739	ACY-1215	3	Phase 1/Phase 2	HDAC inhibitor	22	HDAC1|HDAC2|HDAC3|HDAC6|HDAC8
hsa-miR-106b-5p	MIMAT0000680	5311221	0.0576701	latanoprost	3	Launched	prostanoid receptor agonist	15	PTGFR	ophthalmology	ocular hypertension|glaucoma
hsa-miR-106b-5p	MIMAT0000680	11179	0.0709886	zinc-undecylenate	3	Launched	other antifungal	7		infectious disease	tinea pedis
hsa-miR-106b-5p	MIMAT0000680	3000226	0.0497325	fusidic-acid	3	Launched	bacterial 30S ribosomal subunit inhibitor	7		dermatology	acne vulgaris (AV)
hsa-miR-106b-5p	MIMAT0000680	2481	0.0788739	butalbital	3	Launched	GABA receptor antagonist	5	CHRNA4|CHRNA7|GABRA1|GABRA2|GABRA3|GABRA4|GABRA5|GABRA6|GABRB1|GABRB2|GABRB3|GABRD|GABRE|GABRG1|GABRG2|GABRG3|GABRP|GABRQ|GRIA2|GRIK2	neurology/psychiatry	headache|muscle relaxant
hsa-miR-106b-5p	MIMAT0000680	6437836	0.0542026	peretinoin	3	Phase 3	retinoid receptor agonist	5	RXRA
hsa-miR-106b-5p	MIMAT0000680	98054312	0.0566112	ajmaline	3	Launched	sodium channel blocker	5		cardiology	Wolff-Parkinson-White Syndrome (WPW)
hsa-miR-106b-5p	MIMAT0000680	442424	0.0799716	genipin	3	Preclinical	choleretic agent	3
hsa-miR-106b-5p	MIMAT0000680	369312	0.0788826	perillyl-alcohol	3	Phase 2	apoptosis stimulant|farnesyltransferase inhibitor	3	FNTA
hsa-miR-106b-5p	MIMAT0000680	5282199	0.0629066	teprenone	3	Launched	mucus protecting agent	3		dermatology	cosmetic
hsa-miR-106b-5p	MIMAT0000680	5280934	0.0520029	alpha-linolenic-acid	3	Phase 3	omega 3 fatty acid stimulant	3	ELOVL4|FADS1|FADS2|FFAR1|FFAR4|PTGS2|SLC8A1|TRPV1
hsa-miR-106b-5p	MIMAT0000680	5905	0.0575467	idoxuridine	3	Launched	DNA directed DNA polymerase inhibitor|DNA synthesis inhibitor	3		infectious disease	virus herpes simplex (HSV)
hsa-miR-106b-5p	MIMAT0000680	441921	0.0506866	ginsenoside-RE	3	Phase 1	anti-inflammatory agent	3
hsa-miR-106b-5p	MIMAT0000680	12018336	0.0498151	desvenlafaxine	3	Launched	serotoninânorepinephrine reuptake inhibitor (SNRI)	3	SLC6A2|SLC6A3|SLC6A4	neurology/psychiatry	depression
hsa-miR-106b-5p	MIMAT0000680	5284607	0.0642797	phytonadione	3	Launched		0	BGLAP|GGCX	hematology	vitamin K deficiency|anticoagulation reversal
hsa-miR-106b-5p	MIMAT0000680	5757	0.0776094	estradiol	2	Launched	estrogen receptor agonist	33	ESR1|ESR2|GPER1|KCNMA1|NR1I2	endocrinology	contraceptive
hsa-miR-106b-5p	MIMAT0000680	5173	0.0735436	SBHA	2	Preclinical	HDAC inhibitor	22	HDAC1|HDAC3
hsa-miR-106b-5p	MIMAT0000680	53340426	0.054382	citarinostat	2	Phase 1	HDAC inhibitor	22
hsa-miR-106b-5p	MIMAT0000680	5634	0.0834604	undecylenic-acid	2	Launched	other antifungal	7		infectious disease	tinea pedis|tinea corporis
hsa-miR-106b-5p	MIMAT0000680	6405	0.0569203	amylene-hydrate	2	Preclinical	local anesthetic	7
hsa-miR-106b-5p	MIMAT0000680	3799	0.0565089	JAK3-inhibitor-V	2	Preclinical	JAK inhibitor	7	JAK3
hsa-miR-106b-5p	MIMAT0000680	46887681	0.0526497	gynostemma-extract	2	Phase 2	calcium channel modulator	7
hsa-miR-106b-5p	MIMAT0000680	4753	0.0493469	phenacemide	2	Launched	sodium channel blocker	5	SCN10A|SCN11A|SCN1A|SCN2A|SCN3A|SCN4A|SCN5A|SCN7A|SCN8A|SCN9A	neurology/psychiatry	epilepsy|seizures
hsa-miR-106b-5p	MIMAT0000680	4234241	0.0515901	D609	2	Preclinical	phospholipase inhibitor	3
hsa-miR-106b-5p	MIMAT0000680	443158	0.0760446	linalool	2	Phase 1	anticonvulsant	3
hsa-miR-106b-5p	MIMAT0000680	76961142	0.0832474	apronal	2	Preclinical	cytochrome P450 modulator	2
hsa-miR-106b-5p	MIMAT0000680	207893	0.0569504	PRT4165	2	Preclinical	polycomb repressive complex inhibitor	2	PRC1
hsa-miR-106b-5p	MIMAT0000680	5280363	0.0504573	dinoprost	2	Launched	prostacyclin analog	2	PTGDR|PTGDR2|PTGER1|PTGER2|PTGER3|PTGER4|PTGFR|TBXA2R	obstetrics/gynecology	labor induction
hsa-miR-106b-5p	MIMAT0000680	445354	0.0529159	retinol	2	Launched	retinoid receptor ligand	2	ALDH1A1|ALDH1A2|ALDH1A3|DHRS3|DHRS4|LRAT|NR2C2|RBP1|RBP3|RDH11|RDH12|RDH13|RDH14|RDH5|RDH8|RETSAT|RHO|RLBP1|RXRA|RXRB|RXRG	dermatology	cosmetic|acne vulgaris (AV)|keratosis
hsa-miR-106b-5p	MIMAT0000680	43805	0.0508017	oxaliplatin	2	Launched	DNA inhibitor	2		oncology	colorectal cancer
hsa-miR-106b-5p	MIMAT0000680	68406	0.0485063	1-octacosanol	2	Phase 2		0
hsa-miR-106b-5p	MIMAT0000680	417214	0.0498633	sodium-orthovanadate	2	Preclinical		0
hsa-miR-106b-5p	MIMAT0000680	643684	0.0648983	ricinoleic-acid	1	Launched	prostanoid receptor agonist	15	PTGER3
hsa-miR-106b-5p	MIMAT0000680	5024764	0.0483007	CGP-7930	1	Preclinical	GABA receptor modulator	11	GABBR1
hsa-miR-106b-5p	MIMAT0000680	445580	0.0603145	doconexent	1	Launched	PPAR receptor agonist	2	FFAR1|PTGS1|PTGS2
hsa-miR-106b-5p	MIMAT0000680	457928	0.0850691	bevirimat-dimeglumine	1	Phase 2	HIV capsid assembly inhibitor	1
hsa-miR-106b-5p	MIMAT0000680	25749233	0.060924	20-hydroxyecdysone	1	Phase 2	ecdysone receptor modulator	1
hsa-miR-106b-5p	MIMAT0000680	46835756	0.060068	SEN-1269	1	Preclinical	beta amyloid inhibitor	1	APP
hsa-miR-106b-5p	MIMAT0000680	5281437	0.0588983	costunolide	1	Preclinical	telomerase inhibitor	1
hsa-miR-106b-5p	MIMAT0000680	135398508	0.0499026	entecavir	1	Launched	DNA replication inhibitor|nucleoside reverse transcriptase inhibitor	1		infectious disease	hepatitis B
hsa-miR-106b-5p	MIMAT0000680	12620	0.0491928	docosanol	1	Launched	lipase clearing factor inhibitor	1	TLR7	dental	cold sore
hsa-miR-106b-5p	MIMAT0000680	121871	0.0485707	medica-16	1	Phase 2	ATP citrase lyase inhibitor	1	FFAR1
hsa-miR-106b-5p	MIMAT0000680	5281045	0.0639585	pyrethrins	1	Launched		0		infectious disease	flea control
hsa-miR-106b-5p	MIMAT0000680	24705	0.0564668	octamethyltrisiloxane	1	Preclinical		0
hsa-miR-106b-5p	MIMAT0000680	24764	0.0545665	dimethicone	1	Launched		0		dermatology	cosmetic
hsa-miR-106b-5p	MIMAT0000680	1711973	0.0495484	methoprene-(s)	1	Preclinical		0
hsa-miR-146b-5p	MIMAT0002809	31307	0.0341123	triamcinolone	10	Launched	glucocorticoid receptor agonist	65	NR3C1	dermatology	corticosteroid-responsive dermatoses
hsa-miR-146b-5p	MIMAT0002809	9386	0.0656272	perfluorodecalin	10	Launched		0		dermatology	cosmetic
hsa-miR-146b-5p	MIMAT0002809	5288149	0.0558999	seocalcitol	9	Phase 3	vitamin D receptor agonist	77	VDR
hsa-miR-146b-5p	MIMAT0002809	16490	0.0395025	flumethasone	9	Launched	glucocorticoid receptor agonist	65	NR3C1|PLA2G1B	otolaryngology|infectious disease|dermatology	otitis|ear infections|corticosteroid-responsive dermatoses
hsa-miR-146b-5p	MIMAT0002809	261004	0.0835579	arsenic-trioxide	9	Launched	apoptosis stimulant	21	AKT1|CCND1|IKBKB|JUN|MAPK1|MAPK3|TXNRD1	gastroenterology	diarrhea
hsa-miR-146b-5p	MIMAT0002809	66414	0.0991826	2-methoxyestradiol	9	Phase 2	hypoxia inducible factor inhibitor	9	COMT|CYP19A1|CYP1A1|CYP1B1|HIF1A|TUBB
hsa-miR-146b-5p	MIMAT0002809	60198	0.12184	exemestane	9	Launched	aromatase inhibitor	9	CYP19A1	oncology	breast cancer
hsa-miR-146b-5p	MIMAT0002809	168049	0.148875	C11-Acetate	9	Phase 3		0	ABAT|ACE|AKR1C3|CA2|CELA1|ESR2|FFAR2|FFAR3|HPRT1|LTA4H|MMP12|NOS1|NOS3|PLA2G1B|PTPN1|SOD1|TXN
hsa-miR-146b-5p	MIMAT0002809	68929	0.0378908	epiestriol	9	Preclinical		0
hsa-miR-146b-5p	MIMAT0002809	9547243	0.0469909	ercalcitriol	9	Phase 1	vitamin D receptor agonist	77	VDR
hsa-miR-146b-5p	MIMAT0002809	5283731	0.0748909	calcifediol	8	Launched	vitamin D receptor agonist	77	VDR	endocrinology	hyperparathyroidism
hsa-miR-146b-5p	MIMAT0002809	5282190	0.0388305	falecalcitriol	8	Launched	vitamin D receptor agonist	77	VDR	endocrinology	hyperparathyroidism
hsa-miR-146b-5p	MIMAT0002809	5281104	0.0551423	paricalcitol	8	Launched	vitamin D receptor agonist	77	VDR	nephrology|endocrinology	chronic kidney disease (CKD)|hyperthyroidism
hsa-miR-146b-5p	MIMAT0002809	25068278	0.0497166	17-PA	8	Preclinical	glucocorticoid receptor agonist	65
hsa-miR-146b-5p	MIMAT0002809	5281243	0.0382575	lutein	8	Launched	antioxidant	27		ophthalmology	macular degeneration|cataracts|retinitis pigmentosa (RP)
hsa-miR-146b-5p	MIMAT0002809	5281224	0.0693702	astaxanthin	8	Launched	antioxidant	27
hsa-miR-146b-5p	MIMAT0002809	159269	0.0320353	telbivudine	8	Launched	DNA polymerase inhibitor	17		infectious disease	hepatitis B
hsa-miR-146b-5p	MIMAT0002809	2577	0.0356919	carmofur	8	Launched	thymidylate synthase inhibitor	15	TYMS	oncology	breast cancer|colorectal cancer
hsa-miR-146b-5p	MIMAT0002809	223997	0.0670034	adrenosterone	8	Preclinical	11-beta hydroxysteroid dehydrogenase inhibitor	9	HSD11B1|HSD11B2
hsa-miR-146b-5p	MIMAT0002809	854498	0.0327208	sobrepin	8	Launched	mucolytic agent	8		pulmonary	chest congestion
hsa-miR-146b-5p	MIMAT0002809	6439522	0.0929212	tapinarof	8	Phase 3	aryl hydrocarbon receptor agonist	8
hsa-miR-146b-5p	MIMAT0002809	72326	0.0556707	NSC-4644	8	Phase 2	ACAT inhibitor|sterol regulatory element binding protein (SREBP) inhibitor	8	PYGM
hsa-miR-146b-5p	MIMAT0002809	73415769	0.0360932	bismuth-subgallate	8	Launched	nitric oxide synthase inhibitor	8	NOS1	gastroenterology	internal deoderant
hsa-miR-146b-5p	MIMAT0002809	154272	0.0562121	10-deacetylbaccatin	8	Preclinical	antitumor agent	8
hsa-miR-146b-5p	MIMAT0002809	5284500	0.0390338	camphor-(1R)	8	Phase 1	TRPV activator	8	TRPV1
hsa-miR-146b-5p	MIMAT0002809	5288845	0.0393783	hexylene-glycol	8	Preclinical		0	AKR1C3|CTPS1|DLG4|HSP90AA1|NOS3|PGF|PLA2G1B|PTPN1|SELP
hsa-miR-146b-5p	MIMAT0002809	1174	0.139832	uracil	8	Launched		0	DPYD|UCKL1
hsa-miR-146b-5p	MIMAT0002809	5282181	0.0607029	alfacalcidol	7	Launched	vitamin D receptor agonist	77	CYP27B1|VDR	endocrinology	vitamin D deficiency
hsa-miR-146b-5p	MIMAT0002809	46931009	0.0572509	doxercalciferol	7	Launched	vitamin D receptor agonist	77	VDR	nephrology|endocrinology	chronic kidney disease (CKD)|hyperparathyroidism
hsa-miR-146b-5p	MIMAT0002809	5288783	0.0438216	calcipotriol	7	Launched	vitamin D receptor agonist	77	VDR	dermatology	psoriasis
hsa-miR-146b-5p	MIMAT0002809	5865	0.0411407	prednisone	7	Launched	glucocorticoid receptor agonist	65	HSD11B1|NR3C1	endocrinology|rheumatology|infectious disease|dermatology|ophthalmology|hematology|gastroenterology|neurology/psychiatry	congenital adrenal hyperplasia|hypercalcemia|rheumatoid arthritis|psoriatic arthritis|ankylosing spondylitis|bursitis|osteoarthritis|epicondylitis|dermatomyositis|psoriasis|mycosis|conjunctivitis|anemia|ulcerative colitis|enteritis|multiple sclerosis|meningitis
hsa-miR-146b-5p	MIMAT0002809	667476	0.101077	dienestrol	7	Launched	estrogen receptor agonist	33	ESR1	endocrinology	menopause
hsa-miR-146b-5p	MIMAT0002809	3994	0.0719261	M-344	7	Preclinical	HDAC inhibitor	22	HDAC8
hsa-miR-146b-5p	MIMAT0002809	6918391	0.0591125	beta-elemene	7	Launched	apoptosis stimulant	21	MMP2|MMP9
hsa-miR-146b-5p	MIMAT0002809	5881	0.043211	dehydroepiandrosterone	7	Launched	protein synthesis stimulant	10	ESR1|ESR2|G6PD|GABRA1|GABRA2|GABRA3|GABRA4|GABRA5|GABRA6|GABRB1|GABRB2|GABRB3|GABRD|GABRE|GABRG1|GABRG2|GABRG3|GABRP|GABRQ|GRIN1|GRIN2A|GRIN2B|GRIN2C|GRIN2D|GRIN3A|GRIN3B|HSD17B1|NR1I2|NR1I3|PPARA|SIGMAR1|SULT2A1|SULT2B1	endocrinology	menopause
hsa-miR-146b-5p	MIMAT0002809	5870	0.0503507	estrone	7	Launched	estrogen receptor agonist|estrogenic hormone	9	ESR1|ESR2	endocrinology	menopause
hsa-miR-146b-5p	MIMAT0002809	192197	0.0831941	hexestrol	7	Launched	synthetic estrogen	8	AKR1C1|ESR1|ESR2	endocrinology	hypoestrogenism
hsa-miR-146b-5p	MIMAT0002809	5280793	0.0485362	ergocalciferol	7	Launched	vitamin analog	7	VDR	endocrinology|orthopedics	hypoparathyroidism|rickets|hypophosphatemia
hsa-miR-146b-5p	MIMAT0002809	86820626	0.0487804	cisplatin	7	Launched	DNA alkylating agent|DNA synthesis inhibitor	7	XIAP	oncology	testicular carcinoma|ovarian cancer|bladder cancer
hsa-miR-146b-5p	MIMAT0002809	6256	0.0382789	trifluridine	7	Launched	DNA directed DNA polymerase inhibitor|thymidylate synthase inhibitor	7	TYMS	infectious disease	virus herpes simplex (HSV)
hsa-miR-146b-5p	MIMAT0002809	5280489	0.0614967	beta-carotene	7	Launched		0
hsa-miR-146b-5p	MIMAT0002809	5283748	0.0321055	secalciferol	6	Launched	vitamin D receptor agonist	77	VDR	critical care	bone fracture
hsa-miR-146b-5p	MIMAT0002809	13711	0.0348643	torcitabine	6	Phase 2	DNA polymerase inhibitor	17	DCK|TK2
hsa-miR-146b-5p	MIMAT0002809	68684	0.106521	clanfenur	6	Preclinical	anticancer agent	11
hsa-miR-146b-5p	MIMAT0002809	94141	0.0327588	NPC-01	6	Phase 3	steroid	11
hsa-miR-146b-5p	MIMAT0002809	5790	0.0374014	floxuridine	6	Launched	DNA synthesis inhibitor	10	TYMS	oncology	colorectal cancer
hsa-miR-146b-5p	MIMAT0002809	6166	0.0408774	desoxycortone	6	Preclinical	mineralocorticoid receptor agonist	9	NR3C1|NR3C2
hsa-miR-146b-5p	MIMAT0002809	5281515	0.0543453	g-caryophyllene	6	Preclinical	acetylcholinesterase inhibitor	8	ACHE
hsa-miR-146b-5p	MIMAT0002809	515328	0.0372961	fdcyd	6	Phase 2	DNA methyltransferase inhibitor	7
hsa-miR-146b-5p	MIMAT0002809	6971205	0.0679119	curcumin	6	Launched	cyclooxygenase inhibitor|histone acetyltransferase inhibitor|lipoxygenase inhibitor|NFkB pathway inhibitor	6	APP|CA1|CA12|CA14|CA2|CA4|CA6|CA9|CHRM3|CYP3A4|DNMT3B|EP300|MMP13|MMP9|NOS2|PTGS1|PTGS2|XDH
hsa-miR-146b-5p	MIMAT0002809	4055	0.0927707	menadione	6	Launched	mitochondrial DNA polymerase inhibitor|phosphatase inhibitor	6	AOX1|BGLAP|F10|F2|F7|F9|GGCX|NQO1|NQO2|PROC|PROS1|PROZ|VKORC1|VKORC1L1	gastroenterology|neurology/psychiatry|dermatology|rheumatology	ulcerative colitis|diarrhea|headache|varicose veins|rheumatoid arthritis
hsa-miR-146b-5p	MIMAT0002809	9062	0.0480108	2-deoxyglucose	6	Phase 2	glycolysis inhibitor	6	SLC2A1|SLC2A2|SLC2A3|SLC2A4
hsa-miR-146b-5p	MIMAT0002809	43157	0.0464102	eniluracil	6	Phase 3	dihydropyrimidine dehydrogenase inhibitor	6	AOX1|DPYD|XDH
hsa-miR-146b-5p	MIMAT0002809	440917	0.0546808	D-limonene	6	Phase 1		0
hsa-miR-146b-5p	MIMAT0002809	443980	0.0329611	flumethasone-pivalate	5	Launched	glucocorticoid receptor agonist	65	NR3C1|SERPINA6	allergy	allergic rhinitis
hsa-miR-146b-5p	MIMAT0002809	9878	0.0329418	fluorometholone	5	Launched	glucocorticoid receptor agonist	65	NR3C1	ophthalmology	eye inflammation
hsa-miR-146b-5p	MIMAT0002809	6741	0.0319806	methylprednisolone	5	Launched	glucocorticoid receptor agonist	65	NR3C1	endocrinology|rheumatology|dermatology|infectious disease|allergy|hematology|neurology/psychiatry|gastroenterology	hypercalcemia|thyroiditis|ankylosing spondylitis|bursitis|osteoarthritis|psoriatic arthritis|seborrheic dermatitis|mycosis|allergic rhinitis|psoriasis|anemia|multiple sclerosis|ulcerative colitis|enteritis
hsa-miR-146b-5p	MIMAT0002809	41097932	0.0439878	equilin	5	Preclinical	estrogen receptor agonist	33	HSD17B1
hsa-miR-146b-5p	MIMAT0002809	56208	0.0415595	sarafloxacin	5	Launched	bacterial DNA gyrase inhibitor	10		infectious disease	gram-negative bacterial infections|gram-positive bacterial infections
hsa-miR-146b-5p	MIMAT0002809	6481236	0.044153	PSI-6130	5	Phase 1	RNA polymerase inhibitor	10
hsa-miR-146b-5p	MIMAT0002809	61041	0.0476889	safranal	5	Phase 2	benzodiazepine receptor agonist	7	GABBR1
hsa-miR-146b-5p	MIMAT0002809	6431152	0.0500972	elemene	5	Phase 3	VEGFR inhibitor	5
hsa-miR-146b-5p	MIMAT0002809	33039	0.043332	alovudine	5	Phase 2	DNA synthesis marker	5
hsa-miR-146b-5p	MIMAT0002809	5997	0.0568153	cholesterol	5	Preclinical		0	RORA
hsa-miR-146b-5p	MIMAT0002809	5146	0.0384356	salicyl-alcohol	5	Preclinical		0
hsa-miR-146b-5p	MIMAT0002809	445913	0.0362875	2-fluoro-2-deoxy-D-galactose	5	Phase 1		0	LCT
hsa-miR-146b-5p	MIMAT0002809	56842011	0.034942	sclareol	5	Preclinical		0
hsa-miR-146b-5p	MIMAT0002809	71245042	0.0375225	AC-186	4	Preclinical	estrogen receptor agonist	33	ESR2
hsa-miR-146b-5p	MIMAT0002809	71311876	0.0742551	MC1568	4	Preclinical	HDAC inhibitor	22	HDAC2
hsa-miR-146b-5p	MIMAT0002809	10205	0.0462589	plumbagin	4	Preclinical	anticancer agent	11
hsa-miR-146b-5p	MIMAT0002809	5329106	0.0525071	toceranib	4	Launched	protein tyrosine kinase inhibitor	7	FLT1|FLT3|KDR|PDGFRA|PDGFRB	oncology	cutaneous mast cell tumors
hsa-miR-146b-5p	MIMAT0002809	4760	0.039557	phenindione	4	Launched	vitamin K antagonist	5	VKORC1	hematology	deep vein thrombosis (DVT)
hsa-miR-146b-5p	MIMAT0002809	230748	0.0343438	INCA-6	4	Preclinical	calcineurin inhibitor	5	NFATC1
hsa-miR-146b-5p	MIMAT0002809	6918141	0.0479535	eldecalcitol	4	Phase 3	bone formation stimulant	4	VDR
hsa-miR-146b-5p	MIMAT0002809	637511	0.0352837	cinnamaldehyde	4	Preclinical	aldose reductase inhibitor|TRPV agonist	4	TRPA1
hsa-miR-146b-5p	MIMAT0002809	8955	0.0317888	pregnenolone	4	Launched	glutamate receptor modulator	4	SULT2B1	rheumatology	rheumatoid arthritis
hsa-miR-146b-5p	MIMAT0002809	444679	0.0443108	ergosterol	4	Preclinical	vitamin D precursor	4
hsa-miR-146b-5p	MIMAT0002809	5280794	0.0439814	stigmasterol	4	Preclinical		0
hsa-miR-146b-5p	MIMAT0002809	638015	0.0314142	retinaldehyde	4	Launched		0		dermatology	cosmetic
hsa-miR-146b-5p	MIMAT0002809	2729042	0.0557847	TCID	4	Preclinical		0
hsa-miR-146b-5p	MIMAT0002809	73115	0.0340702	clevudine	3	Launched	DNA polymerase inhibitor	17		infectious disease	hepatitis B
hsa-miR-146b-5p	MIMAT0002809	101498	0.0328991	5-FP	3	Phase 1	thymidylate synthase inhibitor	15	TYMS
hsa-miR-146b-5p	MIMAT0002809	129396801	0.0322926	minocycline	3	Launched	bacterial 30S ribosomal subunit inhibitor	7		endocrinology|infectious disease|ophthalmology|urology	fever|respiratory tract infections|psittacosis|trachoma|conjunctivitis|urethritis|chancroid|tularemia|cholera|brucellosis
hsa-miR-146b-5p	MIMAT0002809	10639	0.040783	rheochrysidin	3	Preclinical	protein tyrosine kinase inhibitor	7	PTPN1
hsa-miR-146b-5p	MIMAT0002809	16124	0.031481	medronic-acid	3	Launched	bone resorption inhibitor	6		radiology	skeletal imaging agent
hsa-miR-146b-5p	MIMAT0002809	5282199	0.0458268	teprenone	3	Launched	mucus protecting agent	3		dermatology	cosmetic
hsa-miR-146b-5p	MIMAT0002809	235905	0.0335322	allylestrenol	3	Launched	steroidal progestin	3	ESR1|PGR|SLC6A9	obstetrics/gynecology	premature labor
hsa-miR-146b-5p	MIMAT0002809	69605	0.0466175	5-fluoropyrimidine	3	Phase 3	kinase inhibitor	3
hsa-miR-146b-5p	MIMAT0002809	445154	0.0410349	resveratrol	3	Launched	cytochrome P450 inhibitor|SIRT activator	3	CSNK2A1|NQO2|PTGS1|PTGS2
hsa-miR-146b-5p	MIMAT0002809	3362	0.0364895	flopropione	3	Launched	serotonin receptor antagonist	3	HTR1A	neurology/psychiatry	spasms
hsa-miR-146b-5p	MIMAT0002809	3035454	0.0337448	bis(maltolato)oxovanadium(IV)	3	Phase 2	tyrosine phosphatase inhibitor	3	PTPN1
hsa-miR-146b-5p	MIMAT0002809	6604215	0.0324102	phensuximide	3	Launched	succinimide antiepileptic	3		neurology/psychiatry	seizures
hsa-miR-146b-5p	MIMAT0002809	6916934	0.031335	aurothioglucose	3	Launched	PKC inhibitor	3	PRKCI	rheumatology	rheumatoid arthritis
hsa-miR-146b-5p	MIMAT0002809	1550234	0.0514382	cyclovalone	3	Launched	breast cancer resistance protein inhibitor	3	ABCG2	gastroenterology	bile stimulation
hsa-miR-146b-5p	MIMAT0002809	57346963	0.0394888	indium-tri(2-propanolate)	3	Preclinical		0
hsa-miR-146b-5p	MIMAT0002809	5284607	0.0434434	phytonadione	3	Launched		0	BGLAP|GGCX	hematology	vitamin K deficiency|anticoagulation reversal
hsa-miR-146b-5p	MIMAT0002809	9883915	0.03181	promestriene	2	Launched	estrogen receptor agonist	33	ESR1	endocrinology	androgenetic alopecia
hsa-miR-146b-5p	MIMAT0002809	104842	0.0500694	SN-38	2	Launched	topoisomerase inhibitor	13	TOP1	oncology	colorectal cancer
hsa-miR-146b-5p	MIMAT0002809	6603903	0.0388298	lomefloxacin	2	Launched	bacterial DNA gyrase inhibitor	10		infectious disease	respiratory tract infections|urinary tract infections
hsa-miR-146b-5p	MIMAT0002809	5282367	0.0427599	menatetrenone	2	Launched	bone resorption inhibitor	6		orthopedics	osteoporosis
hsa-miR-146b-5p	MIMAT0002809	4234241	0.0328457	D609	2	Preclinical	phospholipase inhibitor	3
hsa-miR-146b-5p	MIMAT0002809	75743	0.0443183	ZAMI-633	2	Phase 3	urease inhibitor	3
hsa-miR-146b-5p	MIMAT0002809	667639	0.0441796	piceatannol	2	Preclinical	SYK inhibitor	3	ATP5A1|ATP5B|ATP5C1|IRF3
hsa-miR-146b-5p	MIMAT0002809	59397065	0.0637508	GNF-5837	2	Preclinical	growth factor receptor inhibitor	2	NTRK1|NTRK2|NTRK3
hsa-miR-146b-5p	MIMAT0002809	207893	0.0423736	PRT4165	2	Preclinical	polycomb repressive complex inhibitor	2	PRC1
hsa-miR-146b-5p	MIMAT0002809	44249042	0.0327644	TMN-355	2	Preclinical	cyclophilin inhibitor	2	PPIA
hsa-miR-146b-5p	MIMAT0002809	5730	0.0358399	ZM-336372	2	Preclinical	RAF inhibitor	2	BRAF|LCK|MAPK14|RAF1
hsa-miR-146b-5p	MIMAT0002809	135398752	0.0343131	oxypurinol	2	Phase 2/Phase 3	xanthine oxidase inhibitor	2	XDH
hsa-miR-146b-5p	MIMAT0002809	72303	0.0323347	honokiol	2	Phase 3	AKT inhibitor	2	ALOX5|PTGS1|PTGS2
hsa-miR-146b-5p	MIMAT0002809	14187	0.0315245	ST-1859	2	Phase 1	antiamyloidogenic agent	2
hsa-miR-146b-5p	MIMAT0002809	10208	0.0315159	chrysophanic-acid	2	Preclinical	EGFR inhibitor	2	EGFR|MTOR
hsa-miR-146b-5p	MIMAT0002809	222284	0.0581476	sitosterol	2	Preclinical		0
hsa-miR-146b-5p	MIMAT0002809	5447	0.0324374	thiodiglycol	2	Preclinical		0
hsa-miR-146b-5p	MIMAT0002809	23384	0.0318193	bonaphthone	2	Phase 3		0
hsa-miR-146b-5p	MIMAT0002809	16679092	0.0435656	visomitin	1	Preclinical	antioxidant	27
hsa-miR-146b-5p	MIMAT0002809	6918848	0.051882	AR-42	1	Phase 1	HDAC inhibitor	22	HDAC1
hsa-miR-146b-5p	MIMAT0002809	19090	0.0336718	megestrol	1	Launched	progesterone receptor agonist	11		oncology	breast cancer
hsa-miR-146b-5p	MIMAT0002809	5472495	0.0434081	exisulind	1	Phase 3	phosphodiesterase inhibitor	8	PDE5A
hsa-miR-146b-5p	MIMAT0002809	3032325	0.0422399	fosfestrol	1	Launched	synthetic estrogen	8	ESR1|ESR2	oncology	prostate cancer
hsa-miR-146b-5p	MIMAT0002809	74603	0.0314191	1,2,3,4,5,6-hexabromocyclohexane	1	Preclinical	JAK inhibitor	7	JAK2
hsa-miR-146b-5p	MIMAT0002809	5351344	0.0385555	combretastatin-A-4	1	Phase 2	tubulin polymerization inhibitor	6
hsa-miR-146b-5p	MIMAT0002809	16046677	0.0464783	sulindac	1	Launched	cyclooxygenase inhibitor	5	AKR1B1	rheumatology	osteoarthritis|rheumatoid arthritis|ankylosing spondylitis
hsa-miR-146b-5p	MIMAT0002809	6603772	0.0403287	mitotane	1	Launched	antineoplastic agent	1	CYP11A1|CYP11B1|ESR1	oncology	adrenal cortical carcinoma
hsa-miR-146b-5p	MIMAT0002809	11808929	0.0357972	ochromycinone	1	Phase 1	STAT inhibitor	1	STAT3
hsa-miR-146b-5p	MIMAT0002809	40469923	0.0353934	O-1918	1	Preclinical	cannabinoid receptor antagonist	1
hsa-miR-146b-5p	MIMAT0002809	42641861	0.0328165	A-967079	1	Preclinical	transient receptor potential channel antagonist	1	TRPA1
hsa-miR-146b-5p	MIMAT0002809	6293	0.0329313	alizarin	1	Preclinical		0
hsa-miR-146b-5p	MIMAT0002809	70846	0.0320357	chlorindione	1	Preclinical		0
hsa-miR-148a-3p	MIMAT0000243	31307	0.199598	triamcinolone	10	Launched	glucocorticoid receptor agonist	65	NR3C1	dermatology	corticosteroid-responsive dermatoses
hsa-miR-148a-3p	MIMAT0000243	9386	0.240631	perfluorodecalin	10	Launched		0		dermatology	cosmetic
hsa-miR-148a-3p	MIMAT0000243	5288149	0.14371	seocalcitol	9	Phase 3	vitamin D receptor agonist	77	VDR
hsa-miR-148a-3p	MIMAT0000243	16490	0.253537	flumethasone	9	Launched	glucocorticoid receptor agonist	65	NR3C1|PLA2G1B	otolaryngology|infectious disease|dermatology	otitis|ear infections|corticosteroid-responsive dermatoses
hsa-miR-148a-3p	MIMAT0000243	261004	0.195967	arsenic-trioxide	9	Launched	apoptosis stimulant	21	AKT1|CCND1|IKBKB|JUN|MAPK1|MAPK3|TXNRD1	gastroenterology	diarrhea
hsa-miR-148a-3p	MIMAT0000243	66414	0.148365	2-methoxyestradiol	9	Phase 2	hypoxia inducible factor inhibitor	9	COMT|CYP19A1|CYP1A1|CYP1B1|HIF1A|TUBB
hsa-miR-148a-3p	MIMAT0000243	168049	0.204163	C11-Acetate	9	Phase 3		0	ABAT|ACE|AKR1C3|CA2|CELA1|ESR2|FFAR2|FFAR3|HPRT1|LTA4H|MMP12|NOS1|NOS3|PLA2G1B|PTPN1|SOD1|TXN
hsa-miR-148a-3p	MIMAT0000243	68929	0.185954	epiestriol	9	Preclinical		0
hsa-miR-148a-3p	MIMAT0000243	9547243	0.139561	ercalcitriol	9	Phase 1	vitamin D receptor agonist	77	VDR
hsa-miR-148a-3p	MIMAT0000243	5282190	0.17872	falecalcitriol	8	Launched	vitamin D receptor agonist	77	VDR	endocrinology	hyperparathyroidism
hsa-miR-148a-3p	MIMAT0000243	5283731	0.117494	calcifediol	8	Launched	vitamin D receptor agonist	77	VDR	endocrinology	hyperparathyroidism
hsa-miR-148a-3p	MIMAT0000243	5281104	0.250203	paricalcitol	8	Launched	vitamin D receptor agonist	77	VDR	nephrology|endocrinology	chronic kidney disease (CKD)|hyperthyroidism
hsa-miR-148a-3p	MIMAT0000243	25068278	0.130528	17-PA	8	Preclinical	glucocorticoid receptor agonist	65
hsa-miR-148a-3p	MIMAT0000243	5281243	0.182779	lutein	8	Launched	antioxidant	27		ophthalmology	macular degeneration|cataracts|retinitis pigmentosa (RP)
hsa-miR-148a-3p	MIMAT0000243	5281224	0.17847	astaxanthin	8	Launched	antioxidant	27
hsa-miR-148a-3p	MIMAT0000243	223997	0.139033	adrenosterone	8	Preclinical	11-beta hydroxysteroid dehydrogenase inhibitor	9	HSD11B1|HSD11B2
hsa-miR-148a-3p	MIMAT0000243	854498	0.225032	sobrepin	8	Launched	mucolytic agent	8		pulmonary	chest congestion
hsa-miR-148a-3p	MIMAT0000243	73415769	0.189859	bismuth-subgallate	8	Launched	nitric oxide synthase inhibitor	8	NOS1	gastroenterology	internal deoderant
hsa-miR-148a-3p	MIMAT0000243	6439522	0.146985	tapinarof	8	Phase 3	aryl hydrocarbon receptor agonist	8
hsa-miR-148a-3p	MIMAT0000243	72326	0.129788	NSC-4644	8	Phase 2	ACAT inhibitor|sterol regulatory element binding protein (SREBP) inhibitor	8	PYGM
hsa-miR-148a-3p	MIMAT0000243	154272	0.350547	10-deacetylbaccatin	8	Preclinical	antitumor agent	8
hsa-miR-148a-3p	MIMAT0000243	5284500	0.141414	camphor-(1R)	8	Phase 1	TRPV activator	8	TRPV1
hsa-miR-148a-3p	MIMAT0000243	5288845	0.13504	hexylene-glycol	8	Preclinical		0	AKR1C3|CTPS1|DLG4|HSP90AA1|NOS3|PGF|PLA2G1B|PTPN1|SELP
hsa-miR-148a-3p	MIMAT0000243	46931009	0.206767	doxercalciferol	7	Launched	vitamin D receptor agonist	77	VDR	nephrology|endocrinology	chronic kidney disease (CKD)|hyperparathyroidism
hsa-miR-148a-3p	MIMAT0000243	5282181	0.175903	alfacalcidol	7	Launched	vitamin D receptor agonist	77	CYP27B1|VDR	endocrinology	vitamin D deficiency
hsa-miR-148a-3p	MIMAT0000243	5865	0.17521	prednisone	7	Launched	glucocorticoid receptor agonist	65	HSD11B1|NR3C1	endocrinology|rheumatology|infectious disease|dermatology|ophthalmology|hematology|gastroenterology|neurology/psychiatry	congenital adrenal hyperplasia|hypercalcemia|rheumatoid arthritis|psoriatic arthritis|ankylosing spondylitis|bursitis|osteoarthritis|epicondylitis|dermatomyositis|psoriasis|mycosis|conjunctivitis|anemia|ulcerative colitis|enteritis|multiple sclerosis|meningitis
hsa-miR-148a-3p	MIMAT0000243	5756	0.164068	estriol	7	Launched	estrogen receptor agonist	33	ESR1|ESR2	endocrinology|obstetrics/gynecology|infectious disease	menopause|vaginal atrophy|urinary tract infections
hsa-miR-148a-3p	MIMAT0000243	27125	0.134945	estetrol	7	Phase 3	selective estrogen receptor modulator (SERM)	10	ESR1
hsa-miR-148a-3p	MIMAT0000243	5881	0.131572	dehydroepiandrosterone	7	Launched	protein synthesis stimulant	10	ESR1|ESR2|G6PD|GABRA1|GABRA2|GABRA3|GABRA4|GABRA5|GABRA6|GABRB1|GABRB2|GABRB3|GABRD|GABRE|GABRG1|GABRG2|GABRG3|GABRP|GABRQ|GRIN1|GRIN2A|GRIN2B|GRIN2C|GRIN2D|GRIN3A|GRIN3B|HSD17B1|NR1I2|NR1I3|PPARA|SIGMAR1|SULT2A1|SULT2B1	endocrinology	menopause
hsa-miR-148a-3p	MIMAT0000243	5280793	0.129693	ergocalciferol	7	Launched	vitamin analog	7	VDR	endocrinology|orthopedics	hypoparathyroidism|rickets|hypophosphatemia
hsa-miR-148a-3p	MIMAT0000243	88113319	0.211727	citric-acid	7	Preclinical	coagulation factor inhibitor	7	AKR1B1|ANG|APRT|BHMT|C8G|CA4|CPB1|CS|CTDSP1|GNMT|HGS|HS3ST3A1|IL4I1|ITPA|LSM6|MDH2|MIF|PDE5A|PKD2L1|PLEKHA1|RNASE1|RNASE3|SRC|TNFSF13B|UCK2
hsa-miR-148a-3p	MIMAT0000243	86820626	0.123059	cisplatin	7	Launched	DNA alkylating agent|DNA synthesis inhibitor	7	XIAP	oncology	testicular carcinoma|ovarian cancer|bladder cancer
hsa-miR-148a-3p	MIMAT0000243	442514	0.215287	hematoxylin	7	Preclinical		0
hsa-miR-148a-3p	MIMAT0000243	5280489	0.180021	beta-carotene	7	Launched		0
hsa-miR-148a-3p	MIMAT0000243	5283748	0.162276	secalciferol	6	Launched	vitamin D receptor agonist	77	VDR	critical care	bone fracture
hsa-miR-148a-3p	MIMAT0000243	1794427	0.170402	chlorogenic-acid	6	Launched	antioxidant	27	SLC37A4	neurology/psychiatry|pulmonary|allergy	headache|chest congestion|allergic rhinitis
hsa-miR-148a-3p	MIMAT0000243	94141	0.115299	NPC-01	6	Phase 3	steroid	11
hsa-miR-148a-3p	MIMAT0000243	6166	0.146491	desoxycortone	6	Preclinical	mineralocorticoid receptor agonist	9	NR3C1|NR3C2
hsa-miR-148a-3p	MIMAT0000243	5281515	0.12057	g-caryophyllene	6	Preclinical	acetylcholinesterase inhibitor	8	ACHE
hsa-miR-148a-3p	MIMAT0000243	6971205	0.124506	curcumin	6	Launched	cyclooxygenase inhibitor|histone acetyltransferase inhibitor|lipoxygenase inhibitor|NFkB pathway inhibitor	6	APP|CA1|CA12|CA14|CA2|CA4|CA6|CA9|CHRM3|CYP3A4|DNMT3B|EP300|MMP13|MMP9|NOS2|PTGS1|PTGS2|XDH
hsa-miR-148a-3p	MIMAT0000243	9062	0.236759	2-deoxyglucose	6	Phase 2	glycolysis inhibitor	6	SLC2A1|SLC2A2|SLC2A3|SLC2A4
hsa-miR-148a-3p	MIMAT0000243	11332752	0.169394	shikimic-acid	6	Preclinical		0
hsa-miR-148a-3p	MIMAT0000243	446098	0.160287	2-fluorofucose	6	Phase 1		0
hsa-miR-148a-3p	MIMAT0000243	159055	0.117147	camphor-(+)	6	Phase 2		0
hsa-miR-148a-3p	MIMAT0000243	6398761	0.145178	maxacalcitol	5	Launched	vitamin D receptor agonist	77	VDR	endocrinology	hyperparathyroidism
hsa-miR-148a-3p	MIMAT0000243	443980	0.113884	flumethasone-pivalate	5	Launched	glucocorticoid receptor agonist	65	NR3C1|SERPINA6	allergy	allergic rhinitis
hsa-miR-148a-3p	MIMAT0000243	9878	0.150395	fluorometholone	5	Launched	glucocorticoid receptor agonist	65	NR3C1	ophthalmology	eye inflammation
hsa-miR-148a-3p	MIMAT0000243	6741	0.141993	methylprednisolone	5	Launched	glucocorticoid receptor agonist	65	NR3C1	endocrinology|rheumatology|dermatology|infectious disease|allergy|hematology|neurology/psychiatry|gastroenterology	hypercalcemia|thyroiditis|ankylosing spondylitis|bursitis|osteoarthritis|psoriatic arthritis|seborrheic dermatitis|mycosis|allergic rhinitis|psoriasis|anemia|multiple sclerosis|ulcerative colitis|enteritis
hsa-miR-148a-3p	MIMAT0000243	3686	0.152861	idebenone	5	Launched	calcium channel modulator	7		neurology/psychiatry|ophthalmology	Alzheimer's disease|Friedreich's ataxia|Leber hereditary optic neuropathy (LHON)
hsa-miR-148a-3p	MIMAT0000243	124605168	0.144698	bruceantin	5	Phase 2	protein synthesis inhibitor	7
hsa-miR-148a-3p	MIMAT0000243	61041	0.126724	safranal	5	Phase 2	benzodiazepine receptor agonist	7	GABBR1
hsa-miR-148a-3p	MIMAT0000243	11213350	0.172072	S-111	5	Phase 2	PARP inhibitor	5	PARP1
hsa-miR-148a-3p	MIMAT0000243	73554252	0.146397	carboplatin	5	Launched	DNA alkylating agent|DNA inhibitor	5		oncology	ovarian cancer
hsa-miR-148a-3p	MIMAT0000243	10219606	0.234891	pinanediol	5	Preclinical		0
hsa-miR-148a-3p	MIMAT0000243	12518181	0.226552	2,3-cis/exo-pinanediol	5	Phase 1		0
hsa-miR-148a-3p	MIMAT0000243	36689751	0.157443	tetroquinone	5	Preclinical		0
hsa-miR-148a-3p	MIMAT0000243	445913	0.139411	2-fluoro-2-deoxy-D-galactose	5	Phase 1		0	LCT
hsa-miR-148a-3p	MIMAT0000243	5997	0.134638	cholesterol	5	Preclinical		0	RORA
hsa-miR-148a-3p	MIMAT0000243	11468733	0.157244	hemomex-s	5	Launched		0	PPARG
hsa-miR-148a-3p	MIMAT0000243	5742590	0.191715	daucosterol	4	Phase 2	apoptosis stimulant	21
hsa-miR-148a-3p	MIMAT0000243	6185	0.140687	K-strophanthidin	4	Phase 2	ATPase inhibitor	14	ATP1A1
hsa-miR-148a-3p	MIMAT0000243	6918305	0.116434	ganaxolone	4	Phase 3	GABA receptor modulator	11	GABRA1|GABRA2|GABRA3|GABRA4|GABRA5|GABRA6
hsa-miR-148a-3p	MIMAT0000243	15478	0.117912	digoxigenin	4	Preclinical	steroid	11
hsa-miR-148a-3p	MIMAT0000243	9854073	0.206418	cabazitaxel	4	Launched	microtubule inhibitor	6	TUBA1A|TUBA1B|TUBA1C|TUBA3C|TUBA3D|TUBA3E|TUBA4A|TUBB|TUBB1|TUBB2A|TUBB2B|TUBB3|TUBB4A|TUBB4B|TUBB6|TUBB8	oncology	prostate cancer
hsa-miR-148a-3p	MIMAT0000243	5311035	0.220983	butaprost	4	Preclinical	prostaglandin receptor agonist	4
hsa-miR-148a-3p	MIMAT0000243	8955	0.128029	pregnenolone	4	Launched	glutamate receptor modulator	4	SULT2B1	rheumatology	rheumatoid arthritis
hsa-miR-148a-3p	MIMAT0000243	31402	0.122129	eltanolone	4	Phase 3	GABA receptor positive allosteric modulator	4	GABRA1|GABRA2|GABRA3|GABRA4|GABRA5|GABRA6|GABRB2|GABRG2
hsa-miR-148a-3p	MIMAT0000243	6474640	0.187957	1,5-dicaffeoylquinic-acid	4	Phase 1		0
hsa-miR-148a-3p	MIMAT0000243	439710	0.123865	L-(+)-rhamnose-monohydrate	4	Preclinical		0
hsa-miR-148a-3p	MIMAT0000243	5284587	0.164606	meprednisone	4	Launched		0	NR3C1
hsa-miR-148a-3p	MIMAT0000243	5280453	0.115562	calcitriol	3	Launched	vitamin D receptor agonist	77	VDR	endocrinology|orthopedics	hypocalcemia|hypoparathyroidism|osteoporosis
hsa-miR-148a-3p	MIMAT0000243	5282381	0.134135	misoprostol	3	Launched	prostanoid receptor agonist	15	PTGER2|PTGER3|PTGER4|PTGIR	gastroenterology	duodenal ulcer disease
hsa-miR-148a-3p	MIMAT0000243	5283066	0.151188	16,16-dimethylprostaglandin-e2	3	Phase 2	prostanoid receptor agonist	15	HPGD
hsa-miR-148a-3p	MIMAT0000243	90656913	0.143698	bafilomycin-a1	3	Preclinical	ATPase inhibitor	14
hsa-miR-148a-3p	MIMAT0000243	153976	0.186926	rostafuroxine	3	Phase 2	ATPase inhibitor	14	ATP1A1
hsa-miR-148a-3p	MIMAT0000243	129010087	0.150529	beta-hydroxy-beta-methylbutyrate	3	Launched	protein synthesis stimulant	10	MTOR
hsa-miR-148a-3p	MIMAT0000243	71621167	0.165054	SNG-1153	3	Preclinical	selective estrogen receptor modulator (SERM)	10	ESR1
hsa-miR-148a-3p	MIMAT0000243	5753	0.151557	corticosterone	3	Preclinical	mineralocorticoid receptor agonist	9	HSD11B1|NCOA1|NR3C2
hsa-miR-148a-3p	MIMAT0000243	3000226	0.119583	fusidic-acid	3	Launched	bacterial 30S ribosomal subunit inhibitor	7		dermatology	acne vulgaris (AV)
hsa-miR-148a-3p	MIMAT0000243	148124	0.22999	docetaxel	3	Launched	tubulin polymerization inhibitor	6	BCL2|MAP2|MAP4|MAPT|NR1I2|TUBA1A|TUBA1B|TUBA1C|TUBA3C|TUBA3D|TUBA3E|TUBA4A|TUBB|TUBB1|TUBB2A|TUBB2B|TUBB3|TUBB4A|TUBB4B|TUBB6|TUBB8	oncology	breast cancer|non-small cell lung cancer (NSCLC)|prostate cancer|gastric adenocarcinoma|head and neck squamous cell carcinoma (HNSCC)
hsa-miR-148a-3p	MIMAT0000243	3001662	0.146187	schisandrol-B	3	Phase 3	lipid peroxidase inhibitor	3
hsa-miR-148a-3p	MIMAT0000243	6444206	0.197466	azalomycin-B	3	Preclinical	bacterial 50S ribosomal subunit inhibitor	3
hsa-miR-148a-3p	MIMAT0000243	6916934	0.16206	aurothioglucose	3	Launched	PKC inhibitor	3	PRKCI	rheumatology	rheumatoid arthritis
hsa-miR-148a-3p	MIMAT0000243	3035454	0.129204	bis(maltolato)oxovanadium(IV)	3	Phase 2	tyrosine phosphatase inhibitor	3	PTPN1
hsa-miR-148a-3p	MIMAT0000243	6436	0.118209	triamcinolone-acetonide	3	Launched	glucocorticoid receptor agonist|immunosuppressant	3	NR3C1|SERPINA6	dermatology	corticosteroid-responsive dermatoses
hsa-miR-148a-3p	MIMAT0000243	441921	0.153116	ginsenoside-RE	3	Phase 1	anti-inflammatory agent	3
hsa-miR-148a-3p	MIMAT0000243	53629521	0.139247	bismuth-subsalicylate	3	Launched	antacid	3		gastroenterology	diarrhea
hsa-miR-148a-3p	MIMAT0000243	6857365	0.13298	sodium-ascorbate	3	Launched		0
hsa-miR-148a-3p	MIMAT0000243	57346963	0.175794	indium-tri(2-propanolate)	3	Preclinical		0
hsa-miR-148a-3p	MIMAT0000243	442343	0.126795	levomenol	3	Launched		0		neurology/psychiatry|infectious disease	spasms|skin infections
hsa-miR-148a-3p	MIMAT0000243	6215	0.147836	fluocinolone-acetonide	2	Launched	glucocorticoid receptor agonist	65	NR3C1|SERPINA6	dermatology	seborrheic dermatitis
hsa-miR-148a-3p	MIMAT0000243	26133	0.123628	hydrocortisone-butyrate	2	Launched	glucocorticoid receptor agonist	65	NR3C1	dermatology	corticosteroid-responsive dermatoses|eczema
hsa-miR-148a-3p	MIMAT0000243	16533	0.113291	betamethasone-valerate	2	Launched	glucocorticoid receptor agonist	65	NR3C1	dermatology	corticosteroid-responsive dermatoses
hsa-miR-148a-3p	MIMAT0000243	6438378	0.137259	limaprost-alfadex	2	Launched	prostanoid receptor agonist	15	PTGER1	cardiology	claudication
hsa-miR-148a-3p	MIMAT0000243	5280723	0.121367	alprostadil	2	Launched	prostanoid receptor agonist	15	CATSPER1|CATSPER2|CATSPER3|CATSPER4|PTGDR|PTGER1|PTGER2|PTGER4|PTGIR	cardiology	congenital heart defects
hsa-miR-148a-3p	MIMAT0000243	6238	0.117378	hydroxyprogesterone	2	Launched	progesterone receptor agonist	11	PGR	obstetrics/gynecology	spontaneous preterm birth
hsa-miR-148a-3p	MIMAT0000243	46887681	0.136099	gynostemma-extract	2	Phase 2	calcium channel modulator	7
hsa-miR-148a-3p	MIMAT0000243	6858005	0.118456	abamectin	2	Launched	benzodiazepine receptor agonist	7	GABBR1|GABBR2	infectious disease	gastrointestinal parasites
hsa-miR-148a-3p	MIMAT0000243	11967282	0.14765	vinflunine	2	Launched	microtubule inhibitor	6		oncology	bladder cancer
hsa-miR-148a-3p	MIMAT0000243	82153	0.139904	flunisolide	2	Launched	cytochrome P450 inhibitor	4	NR3C1	allergy	allergic rhinitis
hsa-miR-148a-3p	MIMAT0000243	47936	0.128037	colforsin	2	Phase 2	adenylyl cyclase activator	3	ADCY2|ADCY5
hsa-miR-148a-3p	MIMAT0000243	1662	0.119875	meglutol	2	Launched	HMGCR inhibitor	3	HMGCR
hsa-miR-148a-3p	MIMAT0000243	667639	0.134776	piceatannol	2	Preclinical	SYK inhibitor	3	ATP5A1|ATP5B|ATP5C1|IRF3
hsa-miR-148a-3p	MIMAT0000243	5318980	0.139067	icaritin	2	Phase 3	PPAR receptor antagonist	2	PDE5A
hsa-miR-148a-3p	MIMAT0000243	441852	0.126774	convallatoxin	2	Preclinical	cardiac glycoside	2
hsa-miR-148a-3p	MIMAT0000243	164676	0.122264	tanshinone-IIA	2	Phase 2/Phase 3	anti-inflammatory agent|interleukin inhibitor	2	IL1B|NR1I2|TNF
hsa-miR-148a-3p	MIMAT0000243	5281718	0.138497	polydatin	2	Phase 2	ICAM1 expression inhibitor	2	ICAM1
hsa-miR-148a-3p	MIMAT0000243	5944	0.133087	cantharidin	2	Launched	protein phosphatase inhibitor	2		dermatology	blisters
hsa-miR-148a-3p	MIMAT0000243	7048656	0.116023	dehydrocholate	2	Preclinical		0
hsa-miR-148a-3p	MIMAT0000243	16923	0.113772	methylprednisolone-sodium-succinate	1	Launched	glucocorticoid receptor agonist	65		endocrinology|rheumatology|dermatology|pulmonary|allergy|infectious disease|ophthalmology|gastroenterology|hematology|neurology/psychiatry	hypercalcemia|thyroiditis|osteoarthritis|rheumatoid arthritis|seborrheic dermatitis|asthma|allergic rhinitis|shingles|conjunctivitis|ulcerative colitis|enteritis|anemia|multiple sclerosis|mycosis
hsa-miR-148a-3p	MIMAT0000243	443967	0.113638	betamethasone-acetate	1	Launched	glucocorticoid receptor agonist	65	NR3C1	dermatology	corticosteroid-responsive dermatoses
hsa-miR-148a-3p	MIMAT0000243	119034	0.117612	asiatic-acid	1	Preclinical	apoptosis stimulant	21	PYGM
hsa-miR-148a-3p	MIMAT0000243	40839	0.138143	vindesine	1	Launched	tubulin polymerization inhibitor	6	TUBB|TUBB1	oncology	breast cancer|non-small cell lung cancer (NSCLC)|melanoma
hsa-miR-148a-3p	MIMAT0000243	24848783	0.118026	desisobutyryl-ciclesonide	1	Launched	cytochrome P450 inhibitor	4		allergy	allergic rhinitis
hsa-miR-148a-3p	MIMAT0000243	76969700	0.144373	acifran	1	Phase 3	cholesterol inhibitor	2	HCAR2|HCAR3
hsa-miR-148a-3p	MIMAT0000243	128853	0.144714	delphinidin	1	Phase 2	membrane permeability inhibitor	1	GLO1
hsa-miR-148a-3p	MIMAT0000243	9064	0.137543	cianidanol	1	Withdrawn	fatty acid synthase inhibitor	1	PTGS1
hsa-miR-148a-3p	MIMAT0000243	114917	0.133486	tanshinone-I	1	Phase 2	AP inhibitor	1	IFNG
hsa-miR-148a-3p	MIMAT0000243	133268482	0.132706	oligomycin-A	1	Preclinical	ATP synthase inhibitor|ATPase inhibitor	1	ATP5A1
hsa-miR-148a-3p	MIMAT0000243	5280863	0.130931	kaempferol	1	Preclinical	bone resorption inhibitor|estrogen-related receptor inverse agonist	1	AKR1B1|ALOX15B|ALOX5|AR|CYP1B1|GLO1|HSD17B1|UGT3A1
hsa-miR-148a-3p	MIMAT0000243	14982	0.1264	ammonium-glycyrrhizinate	1	Launched	thrombin inhibitor	1	HSD11B1|HSD11B2|SLCO1B1|SLCO1B3	dermatology	cosmetic
hsa-miR-148a-3p	MIMAT0000243	11629084	0.120699	salvianolic-acid-B	1	Phase 2	EGFR inhibitor|metalloproteinase inhibitor	1	MMP9
hsa-miR-148a-3p	MIMAT0000243	86278938	0.11693	nanchangmycin	1	Preclinical	other antibiotic	1
hsa-miR-148a-3p	MIMAT0000243	92461199	0.115695	KBG	1	Phase 2	neprilysin inhibitor	1	MME
hsa-miR-148a-3p	MIMAT0000243	11768995	0.135866	2,3-cis/exo-camphanediol	1	Phase 1		0
hsa-miR-148a-3p	MIMAT0000243	3085092	0.131362	salinomycin	1	Launched		0		infectious disease	coccidiosis
hsa-miR-148a-3p	MIMAT0000243	72277	0.119145	epigallocatechin-(-)	1	Phase 2		0
hsa-miR-148a-3p	MIMAT0000243	11250133	0.116806	procyanidin-B-2	1	Phase 2		0
hsa-miR-22-3p	MIMAT0000077	31307	0.061156	triamcinolone	10	Launched	glucocorticoid receptor agonist	65	NR3C1	dermatology	corticosteroid-responsive dermatoses
hsa-miR-22-3p	MIMAT0000077	9386	0.065626	perfluorodecalin	10	Launched		0		dermatology	cosmetic
hsa-miR-22-3p	MIMAT0000077	5288149	0.0957738	seocalcitol	9	Phase 3	vitamin D receptor agonist	77	VDR
hsa-miR-22-3p	MIMAT0000077	16490	0.0770566	flumethasone	9	Launched	glucocorticoid receptor agonist	65	NR3C1|PLA2G1B	otolaryngology|infectious disease|dermatology	otitis|ear infections|corticosteroid-responsive dermatoses
hsa-miR-22-3p	MIMAT0000077	261004	0.0948945	arsenic-trioxide	9	Launched	apoptosis stimulant	21	AKT1|CCND1|IKBKB|JUN|MAPK1|MAPK3|TXNRD1	gastroenterology	diarrhea
hsa-miR-22-3p	MIMAT0000077	66414	0.143111	2-methoxyestradiol	9	Phase 2	hypoxia inducible factor inhibitor	9	COMT|CYP19A1|CYP1A1|CYP1B1|HIF1A|TUBB
hsa-miR-22-3p	MIMAT0000077	60198	0.0712969	exemestane	9	Launched	aromatase inhibitor	9	CYP19A1	oncology	breast cancer
hsa-miR-22-3p	MIMAT0000077	168049	0.145846	C11-Acetate	9	Phase 3		0	ABAT|ACE|AKR1C3|CA2|CELA1|ESR2|FFAR2|FFAR3|HPRT1|LTA4H|MMP12|NOS1|NOS3|PLA2G1B|PTPN1|SOD1|TXN
hsa-miR-22-3p	MIMAT0000077	68929	0.0765225	epiestriol	9	Preclinical		0
hsa-miR-22-3p	MIMAT0000077	9547243	0.115081	ercalcitriol	9	Phase 1	vitamin D receptor agonist	77	VDR
hsa-miR-22-3p	MIMAT0000077	5283731	0.146964	calcifediol	8	Launched	vitamin D receptor agonist	77	VDR	endocrinology	hyperparathyroidism
hsa-miR-22-3p	MIMAT0000077	5282190	0.115313	falecalcitriol	8	Launched	vitamin D receptor agonist	77	VDR	endocrinology	hyperparathyroidism
hsa-miR-22-3p	MIMAT0000077	5281104	0.105793	paricalcitol	8	Launched	vitamin D receptor agonist	77	VDR	nephrology|endocrinology	chronic kidney disease (CKD)|hyperthyroidism
hsa-miR-22-3p	MIMAT0000077	25068278	0.175187	17-PA	8	Preclinical	glucocorticoid receptor agonist	65
hsa-miR-22-3p	MIMAT0000077	5281243	0.163811	lutein	8	Launched	antioxidant	27		ophthalmology	macular degeneration|cataracts|retinitis pigmentosa (RP)
hsa-miR-22-3p	MIMAT0000077	5281224	0.134051	astaxanthin	8	Launched	antioxidant	27
hsa-miR-22-3p	MIMAT0000077	159269	0.0837486	telbivudine	8	Launched	DNA polymerase inhibitor	17		infectious disease	hepatitis B
hsa-miR-22-3p	MIMAT0000077	223997	0.0918715	adrenosterone	8	Preclinical	11-beta hydroxysteroid dehydrogenase inhibitor	9	HSD11B1|HSD11B2
hsa-miR-22-3p	MIMAT0000077	854498	0.147905	sobrepin	8	Launched	mucolytic agent	8		pulmonary	chest congestion
hsa-miR-22-3p	MIMAT0000077	6439522	0.133486	tapinarof	8	Phase 3	aryl hydrocarbon receptor agonist	8
hsa-miR-22-3p	MIMAT0000077	73415769	0.12256	bismuth-subgallate	8	Launched	nitric oxide synthase inhibitor	8	NOS1	gastroenterology	internal deoderant
hsa-miR-22-3p	MIMAT0000077	72326	0.117031	NSC-4644	8	Phase 2	ACAT inhibitor|sterol regulatory element binding protein (SREBP) inhibitor	8	PYGM
hsa-miR-22-3p	MIMAT0000077	154272	0.0717963	10-deacetylbaccatin	8	Preclinical	antitumor agent	8
hsa-miR-22-3p	MIMAT0000077	5284500	0.0686427	camphor-(1R)	8	Phase 1	TRPV activator	8	TRPV1
hsa-miR-22-3p	MIMAT0000077	5288845	0.0928902	hexylene-glycol	8	Preclinical		0	AKR1C3|CTPS1|DLG4|HSP90AA1|NOS3|PGF|PLA2G1B|PTPN1|SELP
hsa-miR-22-3p	MIMAT0000077	1174	0.136756	uracil	8	Launched		0	DPYD|UCKL1
hsa-miR-22-3p	MIMAT0000077	5282181	0.24208	alfacalcidol	7	Launched	vitamin D receptor agonist	77	CYP27B1|VDR	endocrinology	vitamin D deficiency
hsa-miR-22-3p	MIMAT0000077	46931009	0.189977	doxercalciferol	7	Launched	vitamin D receptor agonist	77	VDR	nephrology|endocrinology	chronic kidney disease (CKD)|hyperparathyroidism
hsa-miR-22-3p	MIMAT0000077	5288783	0.103762	calcipotriol	7	Launched	vitamin D receptor agonist	77	VDR	dermatology	psoriasis
hsa-miR-22-3p	MIMAT0000077	667476	0.180129	dienestrol	7	Launched	estrogen receptor agonist	33	ESR1	endocrinology	menopause
hsa-miR-22-3p	MIMAT0000077	3994	0.0951662	M-344	7	Preclinical	HDAC inhibitor	22	HDAC8
hsa-miR-22-3p	MIMAT0000077	6918391	0.143456	beta-elemene	7	Launched	apoptosis stimulant	21	MMP2|MMP9
hsa-miR-22-3p	MIMAT0000077	5881	0.091572	dehydroepiandrosterone	7	Launched	protein synthesis stimulant	10	ESR1|ESR2|G6PD|GABRA1|GABRA2|GABRA3|GABRA4|GABRA5|GABRA6|GABRB1|GABRB2|GABRB3|GABRD|GABRE|GABRG1|GABRG2|GABRG3|GABRP|GABRQ|GRIN1|GRIN2A|GRIN2B|GRIN2C|GRIN2D|GRIN3A|GRIN3B|HSD17B1|NR1I2|NR1I3|PPARA|SIGMAR1|SULT2A1|SULT2B1	endocrinology	menopause
hsa-miR-22-3p	MIMAT0000077	27125	0.0646941	estetrol	7	Phase 3	selective estrogen receptor modulator (SERM)	10	ESR1
hsa-miR-22-3p	MIMAT0000077	5870	0.0755363	estrone	7	Launched	estrogen receptor agonist|estrogenic hormone	9	ESR1|ESR2	endocrinology	menopause
hsa-miR-22-3p	MIMAT0000077	192197	0.100203	hexestrol	7	Launched	synthetic estrogen	8	AKR1C1|ESR1|ESR2	endocrinology	hypoestrogenism
hsa-miR-22-3p	MIMAT0000077	10044	0.0666688	triptan	7	Phase 1	serotonin receptor agonist	8	HTR1B|HTR1D
hsa-miR-22-3p	MIMAT0000077	5280793	0.160033	ergocalciferol	7	Launched	vitamin analog	7	VDR	endocrinology|orthopedics	hypoparathyroidism|rickets|hypophosphatemia
hsa-miR-22-3p	MIMAT0000077	88113319	0.120022	citric-acid	7	Preclinical	coagulation factor inhibitor	7	AKR1B1|ANG|APRT|BHMT|C8G|CA4|CPB1|CS|CTDSP1|GNMT|HGS|HS3ST3A1|IL4I1|ITPA|LSM6|MDH2|MIF|PDE5A|PKD2L1|PLEKHA1|RNASE1|RNASE3|SRC|TNFSF13B|UCK2
hsa-miR-22-3p	MIMAT0000077	86820626	0.0991807	cisplatin	7	Launched	DNA alkylating agent|DNA synthesis inhibitor	7	XIAP	oncology	testicular carcinoma|ovarian cancer|bladder cancer
hsa-miR-22-3p	MIMAT0000077	6256	0.0756028	trifluridine	7	Launched	DNA directed DNA polymerase inhibitor|thymidylate synthase inhibitor	7	TYMS	infectious disease	virus herpes simplex (HSV)
hsa-miR-22-3p	MIMAT0000077	5280489	0.145082	beta-carotene	7	Launched		0
hsa-miR-22-3p	MIMAT0000077	5283748	0.0877857	secalciferol	6	Launched	vitamin D receptor agonist	77	VDR	critical care	bone fracture
hsa-miR-22-3p	MIMAT0000077	1794427	0.0825065	chlorogenic-acid	6	Launched	antioxidant	27	SLC37A4	neurology/psychiatry|pulmonary|allergy	headache|chest congestion|allergic rhinitis
hsa-miR-22-3p	MIMAT0000077	94141	0.0716092	NPC-01	6	Phase 3	steroid	11
hsa-miR-22-3p	MIMAT0000077	5790	0.0774025	floxuridine	6	Launched	DNA synthesis inhibitor	10	TYMS	oncology	colorectal cancer
hsa-miR-22-3p	MIMAT0000077	5281515	0.0990062	g-caryophyllene	6	Preclinical	acetylcholinesterase inhibitor	8	ACHE
hsa-miR-22-3p	MIMAT0000077	6971205	0.10121	curcumin	6	Launched	cyclooxygenase inhibitor|histone acetyltransferase inhibitor|lipoxygenase inhibitor|NFkB pathway inhibitor	6	APP|CA1|CA12|CA14|CA2|CA4|CA6|CA9|CHRM3|CYP3A4|DNMT3B|EP300|MMP13|MMP9|NOS2|PTGS1|PTGS2|XDH
hsa-miR-22-3p	MIMAT0000077	9062	0.0753274	2-deoxyglucose	6	Phase 2	glycolysis inhibitor	6	SLC2A1|SLC2A2|SLC2A3|SLC2A4
hsa-miR-22-3p	MIMAT0000077	4091	0.0722629	metformin	6	Launched	insulin sensitizer	6	ACACB|PRKAB1	endocrinology	diabetes mellitus
hsa-miR-22-3p	MIMAT0000077	4055	0.0618679	menadione	6	Launched	mitochondrial DNA polymerase inhibitor|phosphatase inhibitor	6	AOX1|BGLAP|F10|F2|F7|F9|GGCX|NQO1|NQO2|PROC|PROS1|PROZ|VKORC1|VKORC1L1	gastroenterology|neurology/psychiatry|dermatology|rheumatology	ulcerative colitis|diarrhea|headache|varicose veins|rheumatoid arthritis
hsa-miR-22-3p	MIMAT0000077	43157	0.0860974	eniluracil	6	Phase 3	dihydropyrimidine dehydrogenase inhibitor	6	AOX1|DPYD|XDH
hsa-miR-22-3p	MIMAT0000077	440917	0.143629	D-limonene	6	Phase 1		0
hsa-miR-22-3p	MIMAT0000077	7057924	0.0736779	2-ethyl-1,3-hexanediol	6	Preclinical		0
hsa-miR-22-3p	MIMAT0000077	11332752	0.0705394	shikimic-acid	6	Preclinical		0
hsa-miR-22-3p	MIMAT0000077	159055	0.0996474	camphor-(+)	6	Phase 2		0
hsa-miR-22-3p	MIMAT0000077	6398761	0.0801845	maxacalcitol	5	Launched	vitamin D receptor agonist	77	VDR	endocrinology	hyperparathyroidism
hsa-miR-22-3p	MIMAT0000077	41097932	0.0634755	equilin	5	Preclinical	estrogen receptor agonist	33	HSD17B1
hsa-miR-22-3p	MIMAT0000077	3686	0.0901346	idebenone	5	Launched	calcium channel modulator	7		neurology/psychiatry|ophthalmology	Alzheimer's disease|Friedreich's ataxia|Leber hereditary optic neuropathy (LHON)
hsa-miR-22-3p	MIMAT0000077	124605168	0.0647161	bruceantin	5	Phase 2	protein synthesis inhibitor	7
hsa-miR-22-3p	MIMAT0000077	61041	0.14106	safranal	5	Phase 2	benzodiazepine receptor agonist	7	GABBR1
hsa-miR-22-3p	MIMAT0000077	6431152	0.148241	elemene	5	Phase 3	VEGFR inhibitor	5
hsa-miR-22-3p	MIMAT0000077	11213350	0.129606	S-111	5	Phase 2	PARP inhibitor	5	PARP1
hsa-miR-22-3p	MIMAT0000077	73554252	0.0677171	carboplatin	5	Launched	DNA alkylating agent|DNA inhibitor	5		oncology	ovarian cancer
hsa-miR-22-3p	MIMAT0000077	86582336	0.0925853	BMS-986142	5	Phase 2	Bruton's tyrosine kinase (BTK) inhibitor	5
hsa-miR-22-3p	MIMAT0000077	64971	0.0844023	betulinic-acid	5	Phase 1/Phase 2	apoptosis stimulant|NFkB pathway inhibitor	5	GPBAR1
hsa-miR-22-3p	MIMAT0000077	5997	0.0647939	cholesterol	5	Preclinical		0	RORA
hsa-miR-22-3p	MIMAT0000077	12518181	0.0643506	2,3-cis/exo-pinanediol	5	Phase 1		0
hsa-miR-22-3p	MIMAT0000077	11468733	0.0959206	hemomex-s	5	Launched		0	PPARG
hsa-miR-22-3p	MIMAT0000077	56842011	0.0807763	sclareol	5	Preclinical		0
hsa-miR-22-3p	MIMAT0000077	6185	0.0620855	K-strophanthidin	4	Phase 2	ATPase inhibitor	14	ATP1A1
hsa-miR-22-3p	MIMAT0000077	6918305	0.129284	ganaxolone	4	Phase 3	GABA receptor modulator	11	GABRA1|GABRA2|GABRA3|GABRA4|GABRA5|GABRA6
hsa-miR-22-3p	MIMAT0000077	15478	0.0695795	digoxigenin	4	Preclinical	steroid	11
hsa-miR-22-3p	MIMAT0000077	10205	0.0655656	plumbagin	4	Preclinical	anticancer agent	11
hsa-miR-22-3p	MIMAT0000077	14240392	0.0630508	curcumol	4	Phase 1	JAK inhibitor	7	JAK1|JAK2|JAK3
hsa-miR-22-3p	MIMAT0000077	31402	0.0925791	eltanolone	4	Phase 3	GABA receptor positive allosteric modulator	4	GABRA1|GABRA2|GABRA3|GABRA4|GABRA5|GABRA6|GABRB2|GABRG2
hsa-miR-22-3p	MIMAT0000077	5311035	0.0711831	butaprost	4	Preclinical	prostaglandin receptor agonist	4
hsa-miR-22-3p	MIMAT0000077	8955	0.0691803	pregnenolone	4	Launched	glutamate receptor modulator	4	SULT2B1	rheumatology	rheumatoid arthritis
hsa-miR-22-3p	MIMAT0000077	637511	0.0638387	cinnamaldehyde	4	Preclinical	aldose reductase inhibitor|TRPV agonist	4	TRPA1
hsa-miR-22-3p	MIMAT0000077	444679	0.0999961	ergosterol	4	Preclinical	vitamin D precursor	4
hsa-miR-22-3p	MIMAT0000077	21584481	0.0612421	DMSO	4	Preclinical	control vehicle	4
hsa-miR-22-3p	MIMAT0000077	5280794	0.0685353	stigmasterol	4	Preclinical		0
hsa-miR-22-3p	MIMAT0000077	5284587	0.0628665	meprednisone	4	Launched		0	NR3C1
hsa-miR-22-3p	MIMAT0000077	638015	0.120307	retinaldehyde	4	Launched		0		dermatology	cosmetic
hsa-miR-22-3p	MIMAT0000077	5280453	0.129341	calcitriol	3	Launched	vitamin D receptor agonist	77	VDR	endocrinology|orthopedics	hypocalcemia|hypoparathyroidism|osteoporosis
hsa-miR-22-3p	MIMAT0000077	5283066	0.0638717	16,16-dimethylprostaglandin-e2	3	Phase 2	prostanoid receptor agonist	15	HPGD
hsa-miR-22-3p	MIMAT0000077	5311221	0.0779456	latanoprost	3	Launched	prostanoid receptor agonist	15	PTGFR	ophthalmology	ocular hypertension|glaucoma
hsa-miR-22-3p	MIMAT0000077	153976	0.0688592	rostafuroxine	3	Phase 2	ATPase inhibitor	14	ATP1A1
hsa-miR-22-3p	MIMAT0000077	10631	0.0651476	medroxyprogesterone	3	Launched	progesterone receptor agonist	11	PGR	endocrinology	contraceptive
hsa-miR-22-3p	MIMAT0000077	71621167	0.063222	SNG-1153	3	Preclinical	selective estrogen receptor modulator (SERM)	10	ESR1
hsa-miR-22-3p	MIMAT0000077	11179	0.07166	zinc-undecylenate	3	Launched	other antifungal	7		infectious disease	tinea pedis
hsa-miR-22-3p	MIMAT0000077	129396801	0.0765145	minocycline	3	Launched	bacterial 30S ribosomal subunit inhibitor	7		endocrinology|infectious disease|ophthalmology|urology	fever|respiratory tract infections|psittacosis|trachoma|conjunctivitis|urethritis|chancroid|tularemia|cholera|brucellosis
hsa-miR-22-3p	MIMAT0000077	3000226	0.0885627	fusidic-acid	3	Launched	bacterial 30S ribosomal subunit inhibitor	7		dermatology	acne vulgaris (AV)
hsa-miR-22-3p	MIMAT0000077	10639	0.0657451	rheochrysidin	3	Preclinical	protein tyrosine kinase inhibitor	7	PTPN1
hsa-miR-22-3p	MIMAT0000077	6437836	0.0881411	peretinoin	3	Phase 3	retinoid receptor agonist	5	RXRA
hsa-miR-22-3p	MIMAT0000077	2481	0.0701521	butalbital	3	Launched	GABA receptor antagonist	5	CHRNA4|CHRNA7|GABRA1|GABRA2|GABRA3|GABRA4|GABRA5|GABRA6|GABRB1|GABRB2|GABRB3|GABRD|GABRE|GABRG1|GABRG2|GABRG3|GABRP|GABRQ|GRIA2|GRIK2	neurology/psychiatry	headache|muscle relaxant
hsa-miR-22-3p	MIMAT0000077	5282199	0.116225	teprenone	3	Launched	mucus protecting agent	3		dermatology	cosmetic
hsa-miR-22-3p	MIMAT0000077	369312	0.108582	perillyl-alcohol	3	Phase 2	apoptosis stimulant|farnesyltransferase inhibitor	3	FNTA
hsa-miR-22-3p	MIMAT0000077	235905	0.0700418	allylestrenol	3	Launched	steroidal progestin	3	ESR1|PGR|SLC6A9	obstetrics/gynecology	premature labor
hsa-miR-22-3p	MIMAT0000077	10041070	0.0623715	altrenogest	3	Launched	progestogen hormone	3	PGR	endocrinology	estrus
hsa-miR-22-3p	MIMAT0000077	1550234	0.0867314	cyclovalone	3	Launched	breast cancer resistance protein inhibitor	3	ABCG2	gastroenterology	bile stimulation
hsa-miR-22-3p	MIMAT0000077	53629521	0.0678613	bismuth-subsalicylate	3	Launched	antacid	3		gastroenterology	diarrhea
hsa-miR-22-3p	MIMAT0000077	442343	0.108111	levomenol	3	Launched		0		neurology/psychiatry|infectious disease	spasms|skin infections
hsa-miR-22-3p	MIMAT0000077	643757	0.105697	cis-aconitic-acid	3	Preclinical		0	ACO2
hsa-miR-22-3p	MIMAT0000077	57346963	0.067036	indium-tri(2-propanolate)	3	Preclinical		0
hsa-miR-22-3p	MIMAT0000077	9976842	0.119332	SR-11302	3	Preclinical		0
hsa-miR-22-3p	MIMAT0000077	5284607	0.0662117	phytonadione	3	Launched		0	BGLAP|GGCX	hematology	vitamin K deficiency|anticoagulation reversal
hsa-miR-22-3p	MIMAT0000077	5757	0.102232	estradiol	2	Launched	estrogen receptor agonist	33	ESR1|ESR2|GPER1|KCNMA1|NR1I2	endocrinology	contraceptive
hsa-miR-22-3p	MIMAT0000077	5282367	0.0718944	menatetrenone	2	Launched	bone resorption inhibitor	6		orthopedics	osteoporosis
hsa-miR-22-3p	MIMAT0000077	443158	0.124318	linalool	2	Phase 1	anticonvulsant	3
hsa-miR-22-3p	MIMAT0000077	54676101	0.0859041	oxaloacetate	2	Phase 2/Phase 3	glutamate release inhibitor	2
hsa-miR-22-3p	MIMAT0000077	403128	0.0772214	caricotamide	2	Phase 2	NADPH quinone oxidoreductase inhibitor	2	NQO2
hsa-miR-22-3p	MIMAT0000077	5318980	0.0682164	icaritin	2	Phase 3	PPAR receptor antagonist	2	PDE5A
hsa-miR-22-3p	MIMAT0000077	457831	0.0664645	plicamycin	2	Launched	alcohol dehydrogenase inhibitor	2		oncology|endocrinology	testicular carcinoma|Paget's disease|hypercalcemia
hsa-miR-22-3p	MIMAT0000077	38988322	0.0640384	3-(4-methylbenzylidene)camphor	2	Launched	endocrine disruptor	2		dermatology	sunscreen lotion
hsa-miR-22-3p	MIMAT0000077	445354	0.100936	retinol	2	Launched	retinoid receptor ligand	2	ALDH1A1|ALDH1A2|ALDH1A3|DHRS3|DHRS4|LRAT|NR2C2|RBP1|RBP3|RDH11|RDH12|RDH13|RDH14|RDH5|RDH8|RETSAT|RHO|RLBP1|RXRA|RXRB|RXRG	dermatology	cosmetic|acne vulgaris (AV)|keratosis
hsa-miR-22-3p	MIMAT0000077	446541	0.0615349	mycophenolic-acid	2	Launched	dehydrogenase inhibitor|inositol monophosphatase inhibitor	2	IMPDH1|IMPDH2	transplant	organ rejection
hsa-miR-22-3p	MIMAT0000077	2734086	0.0945491	A0001	2	Phase 2		0
hsa-miR-22-3p	MIMAT0000077	7048656	0.061213	dehydrocholate	2	Preclinical		0
hsa-miR-22-3p	MIMAT0000077	854026	0.0868243	huperzine-A	1	Phase 2	acetylcholinesterase inhibitor	8	ACHE
hsa-miR-22-3p	MIMAT0000077	73346713	0.0747078	seratrodast	1	Launched	prostanoid receptor antagonist	3	TBXA2R	pulmonary	asthma
hsa-miR-22-3p	MIMAT0000077	5282350	0.106253	delta-tocotrienol	1	Phase 1	HMGCR inhibitor	3	HMGCR
hsa-miR-22-3p	MIMAT0000077	446925	0.090704	lycopene	1	Launched	free radical scavenger	1
hsa-miR-22-3p	MIMAT0000077	44338126	0.0635125	kainic-acid	1	Preclinical	kainate receptor agonist	1	GRIA1|GRIK1|GRIK2|GRIK3|GRIK4|GRIK5
hsa-miR-22-3p	MIMAT0000077	5281915	0.0747127	coenzyme-Q10	1	Launched		0
hsa-miR-22-3p	MIMAT0000077	6604597	0.0691173	isometheptene-mucate	1	Launched		0		neurology/psychiatry	headache
hsa-miR-22-3p	MIMAT0000077	6674	0.0622483	dehydrocholate-acid	1	Preclinical		0
hsa-miR-22-3p	MIMAT0000077	222656	0.0615723	malic-acid	1	Launched		0	PKD2L1
hsa-miR-23a-3p	MIMAT0000078	31307	0.0801855	triamcinolone	10	Launched	glucocorticoid receptor agonist	65	NR3C1	dermatology	corticosteroid-responsive dermatoses
hsa-miR-23a-3p	MIMAT0000078	9386	0.108469	perfluorodecalin	10	Launched		0		dermatology	cosmetic
hsa-miR-23a-3p	MIMAT0000078	5288149	0.08188	seocalcitol	9	Phase 3	vitamin D receptor agonist	77	VDR
hsa-miR-23a-3p	MIMAT0000078	16490	0.113534	flumethasone	9	Launched	glucocorticoid receptor agonist	65	NR3C1|PLA2G1B	otolaryngology|infectious disease|dermatology	otitis|ear infections|corticosteroid-responsive dermatoses
hsa-miR-23a-3p	MIMAT0000078	261004	0.125755	arsenic-trioxide	9	Launched	apoptosis stimulant	21	AKT1|CCND1|IKBKB|JUN|MAPK1|MAPK3|TXNRD1	gastroenterology	diarrhea
hsa-miR-23a-3p	MIMAT0000078	66414	0.170497	2-methoxyestradiol	9	Phase 2	hypoxia inducible factor inhibitor	9	COMT|CYP19A1|CYP1A1|CYP1B1|HIF1A|TUBB
hsa-miR-23a-3p	MIMAT0000078	60198	0.144308	exemestane	9	Launched	aromatase inhibitor	9	CYP19A1	oncology	breast cancer
hsa-miR-23a-3p	MIMAT0000078	68929	0.148673	epiestriol	9	Preclinical		0
hsa-miR-23a-3p	MIMAT0000078	9547243	0.0983287	ercalcitriol	9	Phase 1	vitamin D receptor agonist	77	VDR
hsa-miR-23a-3p	MIMAT0000078	5282190	0.0937638	falecalcitriol	8	Launched	vitamin D receptor agonist	77	VDR	endocrinology	hyperparathyroidism
hsa-miR-23a-3p	MIMAT0000078	5281243	0.117656	lutein	8	Launched	antioxidant	27		ophthalmology	macular degeneration|cataracts|retinitis pigmentosa (RP)
hsa-miR-23a-3p	MIMAT0000078	5281224	0.111834	astaxanthin	8	Launched	antioxidant	27
hsa-miR-23a-3p	MIMAT0000078	159269	0.096421	telbivudine	8	Launched	DNA polymerase inhibitor	17		infectious disease	hepatitis B
hsa-miR-23a-3p	MIMAT0000078	2577	0.112772	carmofur	8	Launched	thymidylate synthase inhibitor	15	TYMS	oncology	breast cancer|colorectal cancer
hsa-miR-23a-3p	MIMAT0000078	223997	0.140994	adrenosterone	8	Preclinical	11-beta hydroxysteroid dehydrogenase inhibitor	9	HSD11B1|HSD11B2
hsa-miR-23a-3p	MIMAT0000078	6439522	0.152076	tapinarof	8	Phase 3	aryl hydrocarbon receptor agonist	8
hsa-miR-23a-3p	MIMAT0000078	73415769	0.104942	bismuth-subgallate	8	Launched	nitric oxide synthase inhibitor	8	NOS1	gastroenterology	internal deoderant
hsa-miR-23a-3p	MIMAT0000078	5288845	0.0799514	hexylene-glycol	8	Preclinical		0	AKR1C3|CTPS1|DLG4|HSP90AA1|NOS3|PGF|PLA2G1B|PTPN1|SELP
hsa-miR-23a-3p	MIMAT0000078	1174	0.191431	uracil	8	Launched		0	DPYD|UCKL1
hsa-miR-23a-3p	MIMAT0000078	5288783	0.0875328	calcipotriol	7	Launched	vitamin D receptor agonist	77	VDR	dermatology	psoriasis
hsa-miR-23a-3p	MIMAT0000078	667476	0.192032	dienestrol	7	Launched	estrogen receptor agonist	33	ESR1	endocrinology	menopause
hsa-miR-23a-3p	MIMAT0000078	5756	0.147724	estriol	7	Launched	estrogen receptor agonist	33	ESR1|ESR2	endocrinology|obstetrics/gynecology|infectious disease	menopause|vaginal atrophy|urinary tract infections
hsa-miR-23a-3p	MIMAT0000078	6918391	0.0821358	beta-elemene	7	Launched	apoptosis stimulant	21	MMP2|MMP9
hsa-miR-23a-3p	MIMAT0000078	27125	0.0821325	estetrol	7	Phase 3	selective estrogen receptor modulator (SERM)	10	ESR1
hsa-miR-23a-3p	MIMAT0000078	5870	0.177398	estrone	7	Launched	estrogen receptor agonist|estrogenic hormone	9	ESR1|ESR2	endocrinology	menopause
hsa-miR-23a-3p	MIMAT0000078	192197	0.167826	hexestrol	7	Launched	synthetic estrogen	8	AKR1C1|ESR1|ESR2	endocrinology	hypoestrogenism
hsa-miR-23a-3p	MIMAT0000078	88113319	0.0974066	citric-acid	7	Preclinical	coagulation factor inhibitor	7	AKR1B1|ANG|APRT|BHMT|C8G|CA4|CPB1|CS|CTDSP1|GNMT|HGS|HS3ST3A1|IL4I1|ITPA|LSM6|MDH2|MIF|PDE5A|PKD2L1|PLEKHA1|RNASE1|RNASE3|SRC|TNFSF13B|UCK2
hsa-miR-23a-3p	MIMAT0000078	442514	0.0826051	hematoxylin	7	Preclinical		0
hsa-miR-23a-3p	MIMAT0000078	1794427	0.107865	chlorogenic-acid	6	Launched	antioxidant	27	SLC37A4	neurology/psychiatry|pulmonary|allergy	headache|chest congestion|allergic rhinitis
hsa-miR-23a-3p	MIMAT0000078	6166	0.0895813	desoxycortone	6	Preclinical	mineralocorticoid receptor agonist	9	NR3C1|NR3C2
hsa-miR-23a-3p	MIMAT0000078	5054	0.130253	resorcinol	6	Launched	phosphodiesterase inhibitor	8	CA12|CA14|CA2|PTGS1	dermatology	acne vulgaris (AV)|eczema|psoriasis|seborrheic dermatitis
hsa-miR-23a-3p	MIMAT0000078	6971205	0.159306	curcumin	6	Launched	cyclooxygenase inhibitor|histone acetyltransferase inhibitor|lipoxygenase inhibitor|NFkB pathway inhibitor	6	APP|CA1|CA12|CA14|CA2|CA4|CA6|CA9|CHRM3|CYP3A4|DNMT3B|EP300|MMP13|MMP9|NOS2|PTGS1|PTGS2|XDH
hsa-miR-23a-3p	MIMAT0000078	4055	0.11112	menadione	6	Launched	mitochondrial DNA polymerase inhibitor|phosphatase inhibitor	6	AOX1|BGLAP|F10|F2|F7|F9|GGCX|NQO1|NQO2|PROC|PROS1|PROZ|VKORC1|VKORC1L1	gastroenterology|neurology/psychiatry|dermatology|rheumatology	ulcerative colitis|diarrhea|headache|varicose veins|rheumatoid arthritis
hsa-miR-23a-3p	MIMAT0000078	440917	0.105845	D-limonene	6	Phase 1		0
hsa-miR-23a-3p	MIMAT0000078	11332752	0.0845871	shikimic-acid	6	Preclinical		0
hsa-miR-23a-3p	MIMAT0000078	446098	0.0804146	2-fluorofucose	6	Phase 1		0
hsa-miR-23a-3p	MIMAT0000078	443980	0.0828081	flumethasone-pivalate	5	Launched	glucocorticoid receptor agonist	65	NR3C1|SERPINA6	allergy	allergic rhinitis
hsa-miR-23a-3p	MIMAT0000078	9878	0.101072	fluorometholone	5	Launched	glucocorticoid receptor agonist	65	NR3C1	ophthalmology	eye inflammation
hsa-miR-23a-3p	MIMAT0000078	41097932	0.13924	equilin	5	Preclinical	estrogen receptor agonist	33	HSD17B1
hsa-miR-23a-3p	MIMAT0000078	56208	0.0835389	sarafloxacin	5	Launched	bacterial DNA gyrase inhibitor	10		infectious disease	gram-negative bacterial infections|gram-positive bacterial infections
hsa-miR-23a-3p	MIMAT0000078	6466	0.0998032	MD-920	5	Phase 1	NFkB pathway inhibitor	6	AADACL2
hsa-miR-23a-3p	MIMAT0000078	73554252	0.0990046	carboplatin	5	Launched	DNA alkylating agent|DNA inhibitor	5		oncology	ovarian cancer
hsa-miR-23a-3p	MIMAT0000078	5146	0.0935948	salicyl-alcohol	5	Preclinical		0
hsa-miR-23a-3p	MIMAT0000078	36689751	0.0910892	tetroquinone	5	Preclinical		0
hsa-miR-23a-3p	MIMAT0000078	5311067	0.0940912	desoximetasone	4	Launched	glucocorticoid receptor agonist	65	NR3C1|PLA2G1B	dermatology	corticosteroid-responsive dermatoses
hsa-miR-23a-3p	MIMAT0000078	10205	0.101325	plumbagin	4	Preclinical	anticancer agent	11
hsa-miR-23a-3p	MIMAT0000078	3610	0.0875209	hexylresorcinol	4	Launched	local anesthetic	7	TYR	infectious disease	skin infections|first-aid antiseptic
hsa-miR-23a-3p	MIMAT0000078	230748	0.108183	INCA-6	4	Preclinical	calcineurin inhibitor	5	NFATC1
hsa-miR-23a-3p	MIMAT0000078	637511	0.114404	cinnamaldehyde	4	Preclinical	aldose reductase inhibitor|TRPV agonist	4	TRPA1
hsa-miR-23a-3p	MIMAT0000078	439710	0.0856913	L-(+)-rhamnose-monohydrate	4	Preclinical		0
hsa-miR-23a-3p	MIMAT0000078	6474640	0.0799659	1,5-dicaffeoylquinic-acid	4	Phase 1		0
hsa-miR-23a-3p	MIMAT0000078	2729042	0.0950593	TCID	4	Preclinical		0
hsa-miR-23a-3p	MIMAT0000078	2374	0.0982336	BHQ	3	Preclinical	ATPase inhibitor	14	ATP2A1
hsa-miR-23a-3p	MIMAT0000078	10631	0.0891535	medroxyprogesterone	3	Launched	progesterone receptor agonist	11	PGR	endocrinology	contraceptive
hsa-miR-23a-3p	MIMAT0000078	11179	0.089003	zinc-undecylenate	3	Launched	other antifungal	7		infectious disease	tinea pedis
hsa-miR-23a-3p	MIMAT0000078	10639	0.106665	rheochrysidin	3	Preclinical	protein tyrosine kinase inhibitor	7	PTPN1
hsa-miR-23a-3p	MIMAT0000078	6437836	0.0883383	peretinoin	3	Phase 3	retinoid receptor agonist	5	RXRA
hsa-miR-23a-3p	MIMAT0000078	445154	0.102539	resveratrol	3	Launched	cytochrome P450 inhibitor|SIRT activator	3	CSNK2A1|NQO2|PTGS1|PTGS2
hsa-miR-23a-3p	MIMAT0000078	3362	0.0940752	flopropione	3	Launched	serotonin receptor antagonist	3	HTR1A	neurology/psychiatry	spasms
hsa-miR-23a-3p	MIMAT0000078	6444206	0.0810214	azalomycin-B	3	Preclinical	bacterial 50S ribosomal subunit inhibitor	3
hsa-miR-23a-3p	MIMAT0000078	1550234	0.126803	cyclovalone	3	Launched	breast cancer resistance protein inhibitor	3	ABCG2	gastroenterology	bile stimulation
hsa-miR-23a-3p	MIMAT0000078	643757	0.0959849	cis-aconitic-acid	3	Preclinical		0	ACO2
hsa-miR-23a-3p	MIMAT0000078	14709	0.103339	prasterone-acetate	3	Preclinical		0
hsa-miR-23a-3p	MIMAT0000078	9976842	0.0906341	SR-11302	3	Preclinical		0
hsa-miR-23a-3p	MIMAT0000078	16533	0.0822579	betamethasone-valerate	2	Launched	glucocorticoid receptor agonist	65	NR3C1	dermatology	corticosteroid-responsive dermatoses
hsa-miR-23a-3p	MIMAT0000078	5318998	0.0804829	licochalcone-A	2	Phase 3	topoisomerase inhibitor	13	PTPN1
hsa-miR-23a-3p	MIMAT0000078	6238	0.0812523	hydroxyprogesterone	2	Launched	progesterone receptor agonist	11	PGR	obstetrics/gynecology	spontaneous preterm birth
hsa-miR-23a-3p	MIMAT0000078	108059	0.105971	segesterone-acetate	2	Launched	progesterone receptor agonist	11	PGR
hsa-miR-23a-3p	MIMAT0000078	5994	0.0801776	progesterone	2	Launched	progesterone receptor agonist	11	CATSPER1|CATSPER2|CATSPER3|CATSPER4|CYP17A1|ESR1|NR3C2|OPRK1|PGR|TRPC5	obstetrics/gynecology|endocrinology	infertility|amenorrhea
hsa-miR-23a-3p	MIMAT0000078	10187	0.0892511	dithranol	2	Launched	DNA synthesis inhibitor	10		dermatology	psoriasis
hsa-miR-23a-3p	MIMAT0000078	5991	0.0953758	ethinyl-estradiol	2	Launched	estrogen receptor agonist|estrogenic hormone	9	ESR1|ESR2|NR1I2	endocrinology	contraceptive
hsa-miR-23a-3p	MIMAT0000078	5634	0.0819367	undecylenic-acid	2	Launched	other antifungal	7		infectious disease	tinea pedis|tinea corporis
hsa-miR-23a-3p	MIMAT0000078	3366	0.0792813	flucytosine	2	Launched	other antifungal	7	DNMT1	infectious disease	bacterial septicemia|endocarditis|urinary tract infections|meningitis
hsa-miR-23a-3p	MIMAT0000078	3799	0.0865904	JAK3-inhibitor-V	2	Preclinical	JAK inhibitor	7	JAK3
hsa-miR-23a-3p	MIMAT0000078	785	0.116206	hydroquinone	2	Launched	melanin inhibitor	3	TYR	dermatology	dyschromia
hsa-miR-23a-3p	MIMAT0000078	3059	0.0850846	diflunisal	2	Launched	prostanoid receptor antagonist	3	PTGS1|PTGS2	rheumatology	rheumatoid arthritis|osteoarthritis
hsa-miR-23a-3p	MIMAT0000078	1662	0.085511	meglutol	2	Launched	HMGCR inhibitor	3	HMGCR
hsa-miR-23a-3p	MIMAT0000078	656615	0.0894606	potassium-canrenoate	2	Launched	mineralocorticoid receptor antagonist	3	NR3C2	cardiology	edema
hsa-miR-23a-3p	MIMAT0000078	2052	0.0843704	tyrphostin-AG-18	2	Preclinical	EGFR inhibitor|tyrosine kinase inhibitor	3	EGFR
hsa-miR-23a-3p	MIMAT0000078	54676101	0.134101	oxaloacetate	2	Phase 2/Phase 3	glutamate release inhibitor	2
hsa-miR-23a-3p	MIMAT0000078	37873	0.0937062	2-oxopropanoate	2	Preclinical	pyruvate dehydrogenase kinase inhibitor	2	ABAT
hsa-miR-23a-3p	MIMAT0000078	10208	0.120493	chrysophanic-acid	2	Preclinical	EGFR inhibitor	2	EGFR|MTOR
hsa-miR-23a-3p	MIMAT0000078	3314	0.106316	eugenol	2	Launched	androgen receptor antagonist	2	AR	dental	toothache
hsa-miR-23a-3p	MIMAT0000078	72303	0.10048	honokiol	2	Phase 3	AKT inhibitor	2	ALOX5|PTGS1|PTGS2
hsa-miR-23a-3p	MIMAT0000078	5360807	0.0934566	lasalocid	2	Launched	bacterial permeability inducer	2		infectious disease	coccidiosis
hsa-miR-23a-3p	MIMAT0000078	637568	0.0875216	dimethyl-fumarate	2	Launched	nuclear factor erythroid derived|like (NRF2) activator	2	KEAP1	neurology/psychiatry	multiple sclerosis
hsa-miR-23a-3p	MIMAT0000078	5281222	0.0821982	butein	2	Preclinical	EGFR inhibitor|SRC inhibitor	2	ACE
hsa-miR-23a-3p	MIMAT0000078	6155526	0.0804578	trans-4-hydroxycrotonic-acid	2	Preclinical	gamma hydroxybutyric acid ligand	2
hsa-miR-23a-3p	MIMAT0000078	5944	0.0804305	cantharidin	2	Launched	protein phosphatase inhibitor	2		dermatology	blisters
hsa-miR-23a-3p	MIMAT0000078	5192	0.0815624	disodium-sebacate	2	Phase 1		0	HBB
hsa-miR-23a-3p	MIMAT0000078	643460	0.118379	sorbic-acid	2	Launched		0
hsa-miR-23a-3p	MIMAT0000078	92730	0.0990374	stetaderm	2	Launched		0
hsa-miR-23a-3p	MIMAT0000078	5743	0.0859121	dexamethasone	1	Launched	glucocorticoid receptor agonist	65	ANXA1|NOS2|NR0B1|NR3C1|NR3C2	endocrinology|rheumatology|allergy|gastroenterology|hematology|neurology/psychiatry|dermatology	hypercalcemia|rheumatoid arthritis|psoriatic arthritis|osteoarthritis|allergic rhinitis|ulcerative colitis|anemia|multiple sclerosis|enteritis|lupus|dermatitis herpetiformis (DH)|nephrotic syndrome|psoriasis
hsa-miR-23a-3p	MIMAT0000078	5311412	0.0818565	rimexolone	1	Launched	glucocorticoid receptor agonist	65	NR3C1|SERPINA6	ophthalmology	anterior uveitis
hsa-miR-23a-3p	MIMAT0000078	445858	0.0946273	ferulic-acid	1	Phase 2	antioxidant	27	CA1|CA12|CA14|CA2|CA4|CA6|CA9
hsa-miR-23a-3p	MIMAT0000078	3885	0.0792061	beta-lapachone	1	Phase 2	topoisomerase inhibitor	13	TOP1
hsa-miR-23a-3p	MIMAT0000078	169870	0.0796646	17-hydroxyprogesterone-caproate	1	Launched	progesterone receptor agonist	11	AR|ESR1|ESR2|NR1H4|NR1I2|NR3C1|PGR	obstetrics/gynecology	spontaneous preterm birth
hsa-miR-23a-3p	MIMAT0000078	9798229	0.112086	7-keto-DHEA	1	Launched	steroid	11
hsa-miR-23a-3p	MIMAT0000078	10207	0.0827468	aloe-emodin	1	Preclinical	anticancer agent	11	CASP8
hsa-miR-23a-3p	MIMAT0000078	3220	0.0894454	emodin	1	Preclinical	11-beta hydroxysteroid dehydrogenase inhibitor	9	CSNK2A1
hsa-miR-23a-3p	MIMAT0000078	460	0.0923187	guaiacol	1	Launched	local anesthetic	7	CA2	pulmonary	cough suppressant
hsa-miR-23a-3p	MIMAT0000078	5287620	0.0813325	brefeldin-A	1	Preclinical	protein synthesis inhibitor	7	ARF1|CYTH2
hsa-miR-23a-3p	MIMAT0000078	2244	0.0925466	aspirin	1	Launched	cyclooxygenase inhibitor	5	AKR1C1|ASIC3|EDNRA|HSPA5|IKBKB|NFKB1|NFKB2|NFKBIA|PRKAA1|PRKAA2|PRKAB1|PRKAB2|PRKAG1|PRKAG2|PRKAG3|PTGS1|PTGS2|RPS6KA3|TP53	neurology/psychiatry|endocrinology|dental	headache|fever|toothache|muscle pain
hsa-miR-23a-3p	MIMAT0000078	7098683	0.0814921	picrotoxinin	1	Preclinical	GABA receptor antagonist	5	GLRA1|GLRA2|GLRA3|GLRB|HTR3A|HTR3B
hsa-miR-23a-3p	MIMAT0000078	5353609	0.0960887	erbstatin-analog	1	Preclinical	EGFR inhibitor|tyrosine kinase inhibitor	3	EGFR
hsa-miR-23a-3p	MIMAT0000078	13789	0.0928616	canrenone	1	Withdrawn	mineralocorticoid receptor antagonist	3	NR3C2
hsa-miR-23a-3p	MIMAT0000078	338	0.0982735	salicylic-acid	1	Launched	cyclooxygenase inhibitor|prostanoid receptor antagonist	2	AKR1C1|ASIC3|PTGS1|PTGS2	dermatology|endocrinology|neurology/psychiatry	acne vulgaris (AV)|fever|pain relief
hsa-miR-23a-3p	MIMAT0000078	72300	0.0843735	magnolol	1	Preclinical	PPAR receptor agonist	2	GABRA1|PPARG
hsa-miR-23a-3p	MIMAT0000078	5281232	0.142073	transcrocetinate	1	Preclinical	glutamate receptor antagonist	1
hsa-miR-23a-3p	MIMAT0000078	11168203	0.101967	AKBA	1	Phase 3	lipoxygenase inhibitor	1	ALOX5
hsa-miR-23a-3p	MIMAT0000078	638278	0.101305	isoliquiritigenin	1	Preclinical	guanylate cyclase activator	1	GABBR1
hsa-miR-23a-3p	MIMAT0000078	9838158	0.0994256	5-octanoylsalicylic-acid	1	Preclinical	protein kinase activator	1
hsa-miR-23a-3p	MIMAT0000078	5281727	0.097495	pterostilbene	1	Phase 2/Phase 3	cyclooxygenase inhibitor|PPAR receptor agonist	1	PTGS2
hsa-miR-23a-3p	MIMAT0000078	6444688	0.0893047	LY223982	1	Phase 2	leukotriene receptor antagonist	1	LTB4R
hsa-miR-23a-3p	MIMAT0000078	636822	0.0881045	alpha-asarone	1	Preclinical	cytochrome P450 inhibitor|HMGCR inhibitor	1	HMGCR
hsa-miR-23a-3p	MIMAT0000078	205912	0.086333	rucinol	1	Phase 1	tyrosinase inhibitor	1	TYR
hsa-miR-23a-3p	MIMAT0000078	74891315	0.0856432	ASC-J9	1	Phase 2	androgen receptor enhancer	1	AR
hsa-miR-23a-3p	MIMAT0000078	68749	0.085447	guacetisal	1	Launched	immunosuppressant	1		pulmonary	cough suppressant
hsa-miR-23a-3p	MIMAT0000078	8569	0.0808528	dioxybenzone	1	Preclinical	topical sunscreen agent	1
hsa-miR-23a-3p	MIMAT0000078	6271	0.0805507	paroxypropione	1	Launched	gonadotropin inhibitor	1
hsa-miR-23a-3p	MIMAT0000078	359	0.127248	phloroglucin	1	Launched		0		neurology/psychiatry	spasms
hsa-miR-23a-3p	MIMAT0000078	5369209	0.0978067	monomethyl-fumarate	1	Launched		0		neurology/psychiatry	multiple sclerosis
hsa-miR-23a-3p	MIMAT0000078	10168	0.087591	rhein	1	Phase 1		0	HSP90AA1
hsa-miR-23a-3p	MIMAT0000078	71755	0.0870862	spizofurone	1	Withdrawn		0
hsa-miR-23a-3p	MIMAT0000078	637542	0.0849649	naringeninic-acid	1	Phase 1		0	HCAR2|PTGR1
hsa-miR-23a-3p	MIMAT0000078	33037	0.082527	glucaric-acid	1	Phase 1		0
hsa-miR-23a-3p	MIMAT0000078	5284538	0.0805672	algestone-acetophenide	1	Launched		0		endocrinology	contraceptive
hsa-miR-23a-3p	MIMAT0000078	342	0.0789728	metacresol	1	Launched		0	INS
hsa-miR-24-3p	MIMAT0000080	31307	0.103275	triamcinolone	10	Launched	glucocorticoid receptor agonist	65	NR3C1	dermatology	corticosteroid-responsive dermatoses
hsa-miR-24-3p	MIMAT0000080	9386	0.164133	perfluorodecalin	10	Launched		0		dermatology	cosmetic
hsa-miR-24-3p	MIMAT0000080	5288149	0.12804	seocalcitol	9	Phase 3	vitamin D receptor agonist	77	VDR
hsa-miR-24-3p	MIMAT0000080	16490	0.157147	flumethasone	9	Launched	glucocorticoid receptor agonist	65	NR3C1|PLA2G1B	otolaryngology|infectious disease|dermatology	otitis|ear infections|corticosteroid-responsive dermatoses
hsa-miR-24-3p	MIMAT0000080	261004	0.238529	arsenic-trioxide	9	Launched	apoptosis stimulant	21	AKT1|CCND1|IKBKB|JUN|MAPK1|MAPK3|TXNRD1	gastroenterology	diarrhea
hsa-miR-24-3p	MIMAT0000080	66414	0.20759	2-methoxyestradiol	9	Phase 2	hypoxia inducible factor inhibitor	9	COMT|CYP19A1|CYP1A1|CYP1B1|HIF1A|TUBB
hsa-miR-24-3p	MIMAT0000080	60198	0.128803	exemestane	9	Launched	aromatase inhibitor	9	CYP19A1	oncology	breast cancer
hsa-miR-24-3p	MIMAT0000080	168049	0.279851	C11-Acetate	9	Phase 3		0	ABAT|ACE|AKR1C3|CA2|CELA1|ESR2|FFAR2|FFAR3|HPRT1|LTA4H|MMP12|NOS1|NOS3|PLA2G1B|PTPN1|SOD1|TXN
hsa-miR-24-3p	MIMAT0000080	5282190	0.113513	falecalcitriol	8	Launched	vitamin D receptor agonist	77	VDR	endocrinology	hyperparathyroidism
hsa-miR-24-3p	MIMAT0000080	5283731	0.0919681	calcifediol	8	Launched	vitamin D receptor agonist	77	VDR	endocrinology	hyperparathyroidism
hsa-miR-24-3p	MIMAT0000080	5281224	0.172142	astaxanthin	8	Launched	antioxidant	27
hsa-miR-24-3p	MIMAT0000080	159269	0.254497	telbivudine	8	Launched	DNA polymerase inhibitor	17		infectious disease	hepatitis B
hsa-miR-24-3p	MIMAT0000080	2577	0.155364	carmofur	8	Launched	thymidylate synthase inhibitor	15	TYMS	oncology	breast cancer|colorectal cancer
hsa-miR-24-3p	MIMAT0000080	223997	0.105988	adrenosterone	8	Preclinical	11-beta hydroxysteroid dehydrogenase inhibitor	9	HSD11B1|HSD11B2
hsa-miR-24-3p	MIMAT0000080	854498	0.0982698	sobrepin	8	Launched	mucolytic agent	8		pulmonary	chest congestion
hsa-miR-24-3p	MIMAT0000080	72326	0.115933	NSC-4644	8	Phase 2	ACAT inhibitor|sterol regulatory element binding protein (SREBP) inhibitor	8	PYGM
hsa-miR-24-3p	MIMAT0000080	73415769	0.103214	bismuth-subgallate	8	Launched	nitric oxide synthase inhibitor	8	NOS1	gastroenterology	internal deoderant
hsa-miR-24-3p	MIMAT0000080	5288845	0.111493	hexylene-glycol	8	Preclinical		0	AKR1C3|CTPS1|DLG4|HSP90AA1|NOS3|PGF|PLA2G1B|PTPN1|SELP
hsa-miR-24-3p	MIMAT0000080	1174	0.301299	uracil	8	Launched		0	DPYD|UCKL1
hsa-miR-24-3p	MIMAT0000080	5282181	0.133696	alfacalcidol	7	Launched	vitamin D receptor agonist	77	CYP27B1|VDR	endocrinology	vitamin D deficiency
hsa-miR-24-3p	MIMAT0000080	5865	0.0860933	prednisone	7	Launched	glucocorticoid receptor agonist	65	HSD11B1|NR3C1	endocrinology|rheumatology|infectious disease|dermatology|ophthalmology|hematology|gastroenterology|neurology/psychiatry	congenital adrenal hyperplasia|hypercalcemia|rheumatoid arthritis|psoriatic arthritis|ankylosing spondylitis|bursitis|osteoarthritis|epicondylitis|dermatomyositis|psoriasis|mycosis|conjunctivitis|anemia|ulcerative colitis|enteritis|multiple sclerosis|meningitis
hsa-miR-24-3p	MIMAT0000080	3994	0.238752	M-344	7	Preclinical	HDAC inhibitor	22	HDAC8
hsa-miR-24-3p	MIMAT0000080	6918391	0.0859103	beta-elemene	7	Launched	apoptosis stimulant	21	MMP2|MMP9
hsa-miR-24-3p	MIMAT0000080	192197	0.113043	hexestrol	7	Launched	synthetic estrogen	8	AKR1C1|ESR1|ESR2	endocrinology	hypoestrogenism
hsa-miR-24-3p	MIMAT0000080	10044	0.126437	triptan	7	Phase 1	serotonin receptor agonist	8	HTR1B|HTR1D
hsa-miR-24-3p	MIMAT0000080	6256	0.274682	trifluridine	7	Launched	DNA directed DNA polymerase inhibitor|thymidylate synthase inhibitor	7	TYMS	infectious disease	virus herpes simplex (HSV)
hsa-miR-24-3p	MIMAT0000080	86820626	0.194735	cisplatin	7	Launched	DNA alkylating agent|DNA synthesis inhibitor	7	XIAP	oncology	testicular carcinoma|ovarian cancer|bladder cancer
hsa-miR-24-3p	MIMAT0000080	88113319	0.168003	citric-acid	7	Preclinical	coagulation factor inhibitor	7	AKR1B1|ANG|APRT|BHMT|C8G|CA4|CPB1|CS|CTDSP1|GNMT|HGS|HS3ST3A1|IL4I1|ITPA|LSM6|MDH2|MIF|PDE5A|PKD2L1|PLEKHA1|RNASE1|RNASE3|SRC|TNFSF13B|UCK2
hsa-miR-24-3p	MIMAT0000080	442514	0.108404	hematoxylin	7	Preclinical		0
hsa-miR-24-3p	MIMAT0000080	1794427	0.0852169	chlorogenic-acid	6	Launched	antioxidant	27	SLC37A4	neurology/psychiatry|pulmonary|allergy	headache|chest congestion|allergic rhinitis
hsa-miR-24-3p	MIMAT0000080	13711	0.204152	torcitabine	6	Phase 2	DNA polymerase inhibitor	17	DCK|TK2
hsa-miR-24-3p	MIMAT0000080	68684	0.115264	clanfenur	6	Preclinical	anticancer agent	11
hsa-miR-24-3p	MIMAT0000080	6166	0.112068	desoxycortone	6	Preclinical	mineralocorticoid receptor agonist	9	NR3C1|NR3C2
hsa-miR-24-3p	MIMAT0000080	515328	0.289271	fdcyd	6	Phase 2	DNA methyltransferase inhibitor	7
hsa-miR-24-3p	MIMAT0000080	6971205	0.0863395	curcumin	6	Launched	cyclooxygenase inhibitor|histone acetyltransferase inhibitor|lipoxygenase inhibitor|NFkB pathway inhibitor	6	APP|CA1|CA12|CA14|CA2|CA4|CA6|CA9|CHRM3|CYP3A4|DNMT3B|EP300|MMP13|MMP9|NOS2|PTGS1|PTGS2|XDH
hsa-miR-24-3p	MIMAT0000080	4091	0.162721	metformin	6	Launched	insulin sensitizer	6	ACACB|PRKAB1	endocrinology	diabetes mellitus
hsa-miR-24-3p	MIMAT0000080	43157	0.130942	eniluracil	6	Phase 3	dihydropyrimidine dehydrogenase inhibitor	6	AOX1|DPYD|XDH
hsa-miR-24-3p	MIMAT0000080	7057924	0.104399	2-ethyl-1,3-hexanediol	6	Preclinical		0
hsa-miR-24-3p	MIMAT0000080	9878	0.0857262	fluorometholone	5	Launched	glucocorticoid receptor agonist	65	NR3C1	ophthalmology	eye inflammation
hsa-miR-24-3p	MIMAT0000080	73581	0.0852285	bilobalide	5	Preclinical	GABA receptor modulator	11	GLRA1|GLRA2|GLRB|HTR3A|HTR3B
hsa-miR-24-3p	MIMAT0000080	6481236	0.258173	PSI-6130	5	Phase 1	RNA polymerase inhibitor	10
hsa-miR-24-3p	MIMAT0000080	3686	0.0938866	idebenone	5	Launched	calcium channel modulator	7		neurology/psychiatry|ophthalmology	Alzheimer's disease|Friedreich's ataxia|Leber hereditary optic neuropathy (LHON)
hsa-miR-24-3p	MIMAT0000080	66377	0.279647	edoxudine	5	Launched	DNA directed DNA polymerase inhibitor	6		infectious disease	virus herpes simplex (HSV)
hsa-miR-24-3p	MIMAT0000080	33039	0.2395	alovudine	5	Phase 2	DNA synthesis marker	5
hsa-miR-24-3p	MIMAT0000080	86582336	0.099815	BMS-986142	5	Phase 2	Bruton's tyrosine kinase (BTK) inhibitor	5
hsa-miR-24-3p	MIMAT0000080	36689751	0.136167	tetroquinone	5	Preclinical		0
hsa-miR-24-3p	MIMAT0000080	445913	0.091524	2-fluoro-2-deoxy-D-galactose	5	Phase 1		0	LCT
hsa-miR-24-3p	MIMAT0000080	5311067	0.0890189	desoximetasone	4	Launched	glucocorticoid receptor agonist	65	NR3C1|PLA2G1B	dermatology	corticosteroid-responsive dermatoses
hsa-miR-24-3p	MIMAT0000080	71311876	0.203872	MC1568	4	Preclinical	HDAC inhibitor	22	HDAC2
hsa-miR-24-3p	MIMAT0000080	5329106	0.0989592	toceranib	4	Launched	protein tyrosine kinase inhibitor	7	FLT1|FLT3|KDR|PDGFRA|PDGFRB	oncology	cutaneous mast cell tumors
hsa-miR-24-3p	MIMAT0000080	637511	0.0894274	cinnamaldehyde	4	Preclinical	aldose reductase inhibitor|TRPV agonist	4	TRPA1
hsa-miR-24-3p	MIMAT0000080	21584481	0.201838	DMSO	4	Preclinical	control vehicle	4
hsa-miR-24-3p	MIMAT0000080	53340666	0.104691	ACY-1215	3	Phase 1/Phase 2	HDAC inhibitor	22	HDAC1|HDAC2|HDAC3|HDAC6|HDAC8
hsa-miR-24-3p	MIMAT0000080	73115	0.243622	clevudine	3	Launched	DNA polymerase inhibitor	17		infectious disease	hepatitis B
hsa-miR-24-3p	MIMAT0000080	5282381	0.0862281	misoprostol	3	Launched	prostanoid receptor agonist	15	PTGER2|PTGER3|PTGER4|PTGIR	gastroenterology	duodenal ulcer disease
hsa-miR-24-3p	MIMAT0000080	101498	0.0905562	5-FP	3	Phase 1	thymidylate synthase inhibitor	15	TYMS
hsa-miR-24-3p	MIMAT0000080	492405	0.112707	favipiravir	3	Phase 3	RNA polymerase inhibitor	10
hsa-miR-24-3p	MIMAT0000080	129010087	0.113321	beta-hydroxy-beta-methylbutyrate	3	Launched	protein synthesis stimulant	10	MTOR
hsa-miR-24-3p	MIMAT0000080	129396801	0.1266	minocycline	3	Launched	bacterial 30S ribosomal subunit inhibitor	7		endocrinology|infectious disease|ophthalmology|urology	fever|respiratory tract infections|psittacosis|trachoma|conjunctivitis|urethritis|chancroid|tularemia|cholera|brucellosis
hsa-miR-24-3p	MIMAT0000080	16124	0.0967947	medronic-acid	3	Launched	bone resorption inhibitor	6		radiology	skeletal imaging agent
hsa-miR-24-3p	MIMAT0000080	2481	0.100579	butalbital	3	Launched	GABA receptor antagonist	5	CHRNA4|CHRNA7|GABRA1|GABRA2|GABRA3|GABRA4|GABRA5|GABRA6|GABRB1|GABRB2|GABRB3|GABRD|GABRE|GABRG1|GABRG2|GABRG3|GABRP|GABRQ|GRIA2|GRIK2	neurology/psychiatry	headache|muscle relaxant
hsa-miR-24-3p	MIMAT0000080	98054312	0.122373	ajmaline	3	Launched	sodium channel blocker	5		cardiology	Wolff-Parkinson-White Syndrome (WPW)
hsa-miR-24-3p	MIMAT0000080	984	0.117561	1-hexadecanal	3	Preclinical	sphingosine 1-phosphate receptor substrate	3	DBI|RHO
hsa-miR-24-3p	MIMAT0000080	3362	0.107776	flopropione	3	Launched	serotonin receptor antagonist	3	HTR1A	neurology/psychiatry	spasms
hsa-miR-24-3p	MIMAT0000080	25271978	0.106793	methsuximide	3	Launched	T-type calcium channel blocker	3	CACNA1G|CACNA1H|CACNA1I	neurology/psychiatry	seizures
hsa-miR-24-3p	MIMAT0000080	6604215	0.092973	phensuximide	3	Launched	succinimide antiepileptic	3		neurology/psychiatry	seizures
hsa-miR-24-3p	MIMAT0000080	3035454	0.0909393	bis(maltolato)oxovanadium(IV)	3	Phase 2	tyrosine phosphatase inhibitor	3	PTPN1
hsa-miR-24-3p	MIMAT0000080	5905	0.148739	idoxuridine	3	Launched	DNA directed DNA polymerase inhibitor|DNA synthesis inhibitor	3		infectious disease	virus herpes simplex (HSV)
hsa-miR-24-3p	MIMAT0000080	12018336	0.11733	desvenlafaxine	3	Launched	serotoninânorepinephrine reuptake inhibitor (SNRI)	3	SLC6A2|SLC6A3|SLC6A4	neurology/psychiatry	depression
hsa-miR-24-3p	MIMAT0000080	643757	0.13714	cis-aconitic-acid	3	Preclinical		0	ACO2
hsa-miR-24-3p	MIMAT0000080	5173	0.171027	SBHA	2	Preclinical	HDAC inhibitor	22	HDAC1|HDAC3
hsa-miR-24-3p	MIMAT0000080	288216	0.0988875	ftorafur	2	Launched	thymidylate synthase inhibitor	15	TYMS	oncology	colorectal cancer
hsa-miR-24-3p	MIMAT0000080	18343	0.0980691	doxifluridine	2	Launched	thymidylate synthase inhibitor	15	TYMS	oncology	colorectal cancer
hsa-miR-24-3p	MIMAT0000080	104842	0.198852	SN-38	2	Launched	topoisomerase inhibitor	13	TOP1	oncology	colorectal cancer
hsa-miR-24-3p	MIMAT0000080	50312	0.112303	fiacitabine	2	Phase 2	DNA synthesis inhibitor	10
hsa-miR-24-3p	MIMAT0000080	6405	0.102566	amylene-hydrate	2	Preclinical	local anesthetic	7
hsa-miR-24-3p	MIMAT0000080	4753	0.101627	phenacemide	2	Launched	sodium channel blocker	5	SCN10A|SCN11A|SCN1A|SCN2A|SCN3A|SCN4A|SCN5A|SCN7A|SCN8A|SCN9A	neurology/psychiatry	epilepsy|seizures
hsa-miR-24-3p	MIMAT0000080	75743	0.165518	ZAMI-633	2	Phase 3	urease inhibitor	3
hsa-miR-24-3p	MIMAT0000080	11646777	0.238855	LY2334737	2	Phase 1	antitumor agent|ribonucleotide reductase inhibitor	2
hsa-miR-24-3p	MIMAT0000080	76961142	0.184318	apronal	2	Preclinical	cytochrome P450 modulator	2
hsa-miR-24-3p	MIMAT0000080	9828310	0.143715	gemcitabine-elaidate	2	Phase 1	apoptosis inhibitor|DNA synthesis inhibitor	2	CMPK1|RRM1|TYMS
hsa-miR-24-3p	MIMAT0000080	403128	0.0890425	caricotamide	2	Phase 2	NADPH quinone oxidoreductase inhibitor	2	NQO2
hsa-miR-24-3p	MIMAT0000080	135398752	0.22374	oxypurinol	2	Phase 2/Phase 3	xanthine oxidase inhibitor	2	XDH
hsa-miR-24-3p	MIMAT0000080	3314	0.196183	eugenol	2	Launched	androgen receptor antagonist	2	AR	dental	toothache
hsa-miR-24-3p	MIMAT0000080	6035	0.15301	broxuridine	2	Phase 2	antimetabolite	2
hsa-miR-24-3p	MIMAT0000080	637568	0.0896542	dimethyl-fumarate	2	Launched	nuclear factor erythroid derived|like (NRF2) activator	2	KEAP1	neurology/psychiatry	multiple sclerosis
hsa-miR-24-3p	MIMAT0000080	5281222	0.0857511	butein	2	Preclinical	EGFR inhibitor|SRC inhibitor	2	ACE
hsa-miR-24-3p	MIMAT0000080	5730	0.0852907	ZM-336372	2	Preclinical	RAF inhibitor	2	BRAF|LCK|MAPK14|RAF1
hsa-miR-24-3p	MIMAT0000080	259994	0.109956	propylene-glycol	2	Launched		0
hsa-miR-24-3p	MIMAT0000080	23384	0.108004	bonaphthone	2	Phase 3		0
hsa-miR-24-3p	MIMAT0000080	11609955	0.151737	resminostat	1	Phase 2	HDAC inhibitor	22	HDAC1|HDAC3|HDAC6|HDAC8
hsa-miR-24-3p	MIMAT0000080	49850262	0.100643	tubastatin-A	1	Preclinical	HDAC inhibitor	22	HDAC6
hsa-miR-24-3p	MIMAT0000080	97226	0.171848	10-hydroxycamptothecin	1	Preclinical	topoisomerase inhibitor	13	TOP1
hsa-miR-24-3p	MIMAT0000080	72402	0.140422	9-aminocamptothecin	1	Phase 2	topoisomerase inhibitor	13	TOP1
hsa-miR-24-3p	MIMAT0000080	24360	0.097136	camptothecin	1	Phase 3	topoisomerase inhibitor	13	TOP1
hsa-miR-24-3p	MIMAT0000080	6456014	0.0829706	belotecan	1	Phase 3	topoisomerase inhibitor	13
hsa-miR-24-3p	MIMAT0000080	4099	0.123161	metharbital	1	Launched	GABA receptor modulator	11	CHRNA4|CHRNA7|GABRA1|GABRA2|GABRA3|GABRA4|GABRA5|GABRA6|GABRB1|GABRB2|GABRB3|GABRD|GABRE|GABRG1|GABRG2|GABRG3|GABRP|GABRQ|GRIA2|GRIK2	neurology/psychiatry	epilepsy
hsa-miR-24-3p	MIMAT0000080	9651	0.102444	galantamine	1	Launched	acetylcholinesterase inhibitor	8	ACHE|BCHE|CHRNA1|CHRNA10|CHRNA2|CHRNA3|CHRNA4|CHRNA5|CHRNA6|CHRNA7|CHRNA9|CHRNB1|CHRNB2|CHRNB3|CHRNB4|CHRND|CHRNE|CHRNG	neurology/psychiatry	senile dementia
hsa-miR-24-3p	MIMAT0000080	5429	0.100298	theobromine	1	Launched	phosphodiesterase inhibitor	8	ADORA1|ADORA2A|PDE4B
hsa-miR-24-3p	MIMAT0000080	129396784	0.0879924	tetracycline	1	Launched	bacterial 30S ribosomal subunit inhibitor	7		infectious disease|dermatology	respiratory tract infections|pneumonia|skin infections|urinary tract infections|acne vulgaris (AV)|plague|psittacosis
hsa-miR-24-3p	MIMAT0000080	134129704	0.0834549	tylosin	1	Launched	protein synthesis inhibitor	7		infectious disease|gastroenterology	gram-positive bacterial infections|colitis
hsa-miR-24-3p	MIMAT0000080	446727	0.188171	brivudine	1	Launched	DNA directed DNA polymerase inhibitor	6		infectious disease	shingles
hsa-miR-24-3p	MIMAT0000080	6918486	0.129948	voclosporin	1	Phase 3	calcineurin inhibitor	5
hsa-miR-24-3p	MIMAT0000080	35370	0.180759	zidovudine	1	Launched	nucleoside reverse transcriptase inhibitor	4	TERT	infectious disease	human immunodeficiency virus (HIV-1)|acquired immunodeficiency syndrome (AIDS)
hsa-miR-24-3p	MIMAT0000080	24066	0.134922	zalcitabine	1	Launched	nucleoside reverse transcriptase inhibitor	4		infectious disease	human immunodeficiency virus (HIV-1)
hsa-miR-24-3p	MIMAT0000080	60877	0.124773	emtricitabine	1	Launched	nucleoside reverse transcriptase inhibitor	4		infectious disease	human immunodeficiency virus (HIV-1)
hsa-miR-24-3p	MIMAT0000080	60825	0.0838889	lamivudine	1	Launched	nucleoside reverse transcriptase inhibitor	4		infectious disease	human immunodeficiency virus (HIV-1)|acquired immunodeficiency syndrome (AIDS)|hepatitis B
hsa-miR-24-3p	MIMAT0000080	51380897	0.141528	paramethadione	1	Launched	anticonvulsant	3	CACNA1G	neurology/psychiatry	seizures
hsa-miR-24-3p	MIMAT0000080	12597	0.0971849	isosorbide	1	Launched	nitric oxide stimulant	3		cardiology	angina pectoris|coronary artery disease (CAD)
hsa-miR-24-3p	MIMAT0000080	4670	0.08572	PACOCF3	1	Preclinical	phospholipase inhibitor	3	PLA2G4A
hsa-miR-24-3p	MIMAT0000080	1990	0.129654	acetohydroxamic-acid	1	Launched	urease inhibitor	3	MMP12	infectious disease	urinary tract infections
hsa-miR-24-3p	MIMAT0000080	68374	0.123152	7-methylxanthine	1	Phase 2	adenosine receptor antagonist	2
hsa-miR-24-3p	MIMAT0000080	54746	0.116458	cabergoline	1	Launched	dopamine receptor agonist	2	ADRA1A|ADRA1B|ADRA1D|ADRA2A|ADRA2B|ADRA2C|ADRB1|ADRB2|DRD1|DRD2|DRD3|DRD4|DRD5|HTR1A|HTR1B|HTR1D|HTR2A|HTR2B|HTR2C|HTR7	endocrinology	hyperprolactinemia
hsa-miR-24-3p	MIMAT0000080	2153	0.0848844	aminophylline	1	Launched	adenosine receptor antagonist	2	ADORA1|ADORA2A|ADORA2B|ADORA3|HDAC2|PDE3A|PDE3B|PDE4A|PDE4B|PDE4C|PDE4D|PDE5A	pulmonary	asthma|bronchitis|emphysema
hsa-miR-24-3p	MIMAT0000080	18283	0.2406	stavudine	1	Launched	DNA directed DNA polymerase inhibitor|nucleoside reverse transcriptase inhibitor	1		infectious disease	human immunodeficiency virus (HIV-1)
hsa-miR-24-3p	MIMAT0000080	122282	0.143596	mebicar	1	Launched	anxiolytic	1		neurology/psychiatry	anxiety
hsa-miR-24-3p	MIMAT0000080	5576	0.1233	trimethadione	1	Launched	oxazolidine antiepileptic	1	CACNA1G|CACNA1H|CACNA1I	neurology/psychiatry	seizures
hsa-miR-24-3p	MIMAT0000080	9824350	0.117417	cipemastat	1	Phase 3	metalloproteinase inhibitor	1	ADAM17|MMP1|MMP13|MMP2|MMP3|MMP8|MMP9
hsa-miR-24-3p	MIMAT0000080	56959087	0.106143	naloxegol	1	Launched	opioid receptor antagonist	1	OPRM1	gastroenterology	constipation
hsa-miR-24-3p	MIMAT0000080	129009887	0.102267	sodium-nitrite	1	Launched	nitric oxide donor	1		critical care	poison antidote|cyanide poisoning
hsa-miR-24-3p	MIMAT0000080	107921	0.100251	mephenytoin	1	Launched	hydantoin antiepileptic	1	SCN5A	neurology/psychiatry	seizures
hsa-miR-24-3p	MIMAT0000080	54671008	0.0984389	raltegravir	1	Launched	HIV integrase inhibitor	1		infectious disease	human immunodeficiency virus (HIV-1)
hsa-miR-24-3p	MIMAT0000080	3164070	0.0978669	walrycin-B	1	Preclinical	transcriptional regulatory protein WalR	1
hsa-miR-24-3p	MIMAT0000080	17756791	0.0963088	Ro-08-2750	1	Preclinical	NGF binding inhibitor	1	NGF|NGFR
hsa-miR-24-3p	MIMAT0000080	449156	0.092573	fidarestat	1	Phase 3	aldose reductase inhibitor	1	AKR1B1
hsa-miR-24-3p	MIMAT0000080	5281884	0.0832389	valspodar	1	Phase 3	P glycoprotein inhibitor	1	ABCB1
hsa-miR-24-3p	MIMAT0000080	92132144	0.11852	cytochlor	1	Phase 1		0
hsa-miR-24-3p	MIMAT0000080	6909	0.0843586	symclosene	1	Preclinical		0
hsa-miR-27b-3p	MIMAT0000419	31307	0.283463	triamcinolone	10	Launched	glucocorticoid receptor agonist	65	NR3C1	dermatology	corticosteroid-responsive dermatoses
hsa-miR-27b-3p	MIMAT0000419	9386	0.339283	perfluorodecalin	10	Launched		0		dermatology	cosmetic
hsa-miR-27b-3p	MIMAT0000419	5288149	0.205313	seocalcitol	9	Phase 3	vitamin D receptor agonist	77	VDR
hsa-miR-27b-3p	MIMAT0000419	16490	0.318412	flumethasone	9	Launched	glucocorticoid receptor agonist	65	NR3C1|PLA2G1B	otolaryngology|infectious disease|dermatology	otitis|ear infections|corticosteroid-responsive dermatoses
hsa-miR-27b-3p	MIMAT0000419	261004	0.255043	arsenic-trioxide	9	Launched	apoptosis stimulant	21	AKT1|CCND1|IKBKB|JUN|MAPK1|MAPK3|TXNRD1	gastroenterology	diarrhea
hsa-miR-27b-3p	MIMAT0000419	66414	0.358725	2-methoxyestradiol	9	Phase 2	hypoxia inducible factor inhibitor	9	COMT|CYP19A1|CYP1A1|CYP1B1|HIF1A|TUBB
hsa-miR-27b-3p	MIMAT0000419	60198	0.165088	exemestane	9	Launched	aromatase inhibitor	9	CYP19A1	oncology	breast cancer
hsa-miR-27b-3p	MIMAT0000419	168049	0.320124	C11-Acetate	9	Phase 3		0	ABAT|ACE|AKR1C3|CA2|CELA1|ESR2|FFAR2|FFAR3|HPRT1|LTA4H|MMP12|NOS1|NOS3|PLA2G1B|PTPN1|SOD1|TXN
hsa-miR-27b-3p	MIMAT0000419	68929	0.242882	epiestriol	9	Preclinical		0
hsa-miR-27b-3p	MIMAT0000419	9547243	0.340969	ercalcitriol	9	Phase 1	vitamin D receptor agonist	77	VDR
hsa-miR-27b-3p	MIMAT0000419	5282190	0.297361	falecalcitriol	8	Launched	vitamin D receptor agonist	77	VDR	endocrinology	hyperparathyroidism
hsa-miR-27b-3p	MIMAT0000419	5283731	0.151224	calcifediol	8	Launched	vitamin D receptor agonist	77	VDR	endocrinology	hyperparathyroidism
hsa-miR-27b-3p	MIMAT0000419	5281104	0.351546	paricalcitol	8	Launched	vitamin D receptor agonist	77	VDR	nephrology|endocrinology	chronic kidney disease (CKD)|hyperthyroidism
hsa-miR-27b-3p	MIMAT0000419	25068278	0.240472	17-PA	8	Preclinical	glucocorticoid receptor agonist	65
hsa-miR-27b-3p	MIMAT0000419	5281243	0.159323	lutein	8	Launched	antioxidant	27		ophthalmology	macular degeneration|cataracts|retinitis pigmentosa (RP)
hsa-miR-27b-3p	MIMAT0000419	159269	0.187997	telbivudine	8	Launched	DNA polymerase inhibitor	17		infectious disease	hepatitis B
hsa-miR-27b-3p	MIMAT0000419	2577	0.225333	carmofur	8	Launched	thymidylate synthase inhibitor	15	TYMS	oncology	breast cancer|colorectal cancer
hsa-miR-27b-3p	MIMAT0000419	854498	0.232244	sobrepin	8	Launched	mucolytic agent	8		pulmonary	chest congestion
hsa-miR-27b-3p	MIMAT0000419	6439522	0.263775	tapinarof	8	Phase 3	aryl hydrocarbon receptor agonist	8
hsa-miR-27b-3p	MIMAT0000419	72326	0.242397	NSC-4644	8	Phase 2	ACAT inhibitor|sterol regulatory element binding protein (SREBP) inhibitor	8	PYGM
hsa-miR-27b-3p	MIMAT0000419	73415769	0.164721	bismuth-subgallate	8	Launched	nitric oxide synthase inhibitor	8	NOS1	gastroenterology	internal deoderant
hsa-miR-27b-3p	MIMAT0000419	154272	0.415284	10-deacetylbaccatin	8	Preclinical	antitumor agent	8
hsa-miR-27b-3p	MIMAT0000419	5284500	0.174125	camphor-(1R)	8	Phase 1	TRPV activator	8	TRPV1
hsa-miR-27b-3p	MIMAT0000419	5288845	0.252654	hexylene-glycol	8	Preclinical		0	AKR1C3|CTPS1|DLG4|HSP90AA1|NOS3|PGF|PLA2G1B|PTPN1|SELP
hsa-miR-27b-3p	MIMAT0000419	1174	0.333348	uracil	8	Launched		0	DPYD|UCKL1
hsa-miR-27b-3p	MIMAT0000419	46931009	0.339875	doxercalciferol	7	Launched	vitamin D receptor agonist	77	VDR	nephrology|endocrinology	chronic kidney disease (CKD)|hyperparathyroidism
hsa-miR-27b-3p	MIMAT0000419	5282181	0.334056	alfacalcidol	7	Launched	vitamin D receptor agonist	77	CYP27B1|VDR	endocrinology	vitamin D deficiency
hsa-miR-27b-3p	MIMAT0000419	5288783	0.188506	calcipotriol	7	Launched	vitamin D receptor agonist	77	VDR	dermatology	psoriasis
hsa-miR-27b-3p	MIMAT0000419	5865	0.311121	prednisone	7	Launched	glucocorticoid receptor agonist	65	HSD11B1|NR3C1	endocrinology|rheumatology|infectious disease|dermatology|ophthalmology|hematology|gastroenterology|neurology/psychiatry	congenital adrenal hyperplasia|hypercalcemia|rheumatoid arthritis|psoriatic arthritis|ankylosing spondylitis|bursitis|osteoarthritis|epicondylitis|dermatomyositis|psoriasis|mycosis|conjunctivitis|anemia|ulcerative colitis|enteritis|multiple sclerosis|meningitis
hsa-miR-27b-3p	MIMAT0000419	667476	0.155135	dienestrol	7	Launched	estrogen receptor agonist	33	ESR1	endocrinology	menopause
hsa-miR-27b-3p	MIMAT0000419	5756	0.249975	estriol	7	Launched	estrogen receptor agonist	33	ESR1|ESR2	endocrinology|obstetrics/gynecology|infectious disease	menopause|vaginal atrophy|urinary tract infections
hsa-miR-27b-3p	MIMAT0000419	6918391	0.244806	beta-elemene	7	Launched	apoptosis stimulant	21	MMP2|MMP9
hsa-miR-27b-3p	MIMAT0000419	27125	0.288063	estetrol	7	Phase 3	selective estrogen receptor modulator (SERM)	10	ESR1
hsa-miR-27b-3p	MIMAT0000419	5870	0.16163	estrone	7	Launched	estrogen receptor agonist|estrogenic hormone	9	ESR1|ESR2	endocrinology	menopause
hsa-miR-27b-3p	MIMAT0000419	10044	0.21297	triptan	7	Phase 1	serotonin receptor agonist	8	HTR1B|HTR1D
hsa-miR-27b-3p	MIMAT0000419	5280793	0.206367	ergocalciferol	7	Launched	vitamin analog	7	VDR	endocrinology|orthopedics	hypoparathyroidism|rickets|hypophosphatemia
hsa-miR-27b-3p	MIMAT0000419	86820626	0.287189	cisplatin	7	Launched	DNA alkylating agent|DNA synthesis inhibitor	7	XIAP	oncology	testicular carcinoma|ovarian cancer|bladder cancer
hsa-miR-27b-3p	MIMAT0000419	6256	0.258248	trifluridine	7	Launched	DNA directed DNA polymerase inhibitor|thymidylate synthase inhibitor	7	TYMS	infectious disease	virus herpes simplex (HSV)
hsa-miR-27b-3p	MIMAT0000419	88113319	0.25287	citric-acid	7	Preclinical	coagulation factor inhibitor	7	AKR1B1|ANG|APRT|BHMT|C8G|CA4|CPB1|CS|CTDSP1|GNMT|HGS|HS3ST3A1|IL4I1|ITPA|LSM6|MDH2|MIF|PDE5A|PKD2L1|PLEKHA1|RNASE1|RNASE3|SRC|TNFSF13B|UCK2
hsa-miR-27b-3p	MIMAT0000419	442514	0.223996	hematoxylin	7	Preclinical		0
hsa-miR-27b-3p	MIMAT0000419	5280489	0.172702	beta-carotene	7	Launched		0
hsa-miR-27b-3p	MIMAT0000419	5283748	0.16785	secalciferol	6	Launched	vitamin D receptor agonist	77	VDR	critical care	bone fracture
hsa-miR-27b-3p	MIMAT0000419	1794427	0.17415	chlorogenic-acid	6	Launched	antioxidant	27	SLC37A4	neurology/psychiatry|pulmonary|allergy	headache|chest congestion|allergic rhinitis
hsa-miR-27b-3p	MIMAT0000419	13711	0.190019	torcitabine	6	Phase 2	DNA polymerase inhibitor	17	DCK|TK2
hsa-miR-27b-3p	MIMAT0000419	68684	0.206429	clanfenur	6	Preclinical	anticancer agent	11
hsa-miR-27b-3p	MIMAT0000419	5790	0.301749	floxuridine	6	Launched	DNA synthesis inhibitor	10	TYMS	oncology	colorectal cancer
hsa-miR-27b-3p	MIMAT0000419	5281515	0.251875	g-caryophyllene	6	Preclinical	acetylcholinesterase inhibitor	8	ACHE
hsa-miR-27b-3p	MIMAT0000419	5054	0.152669	resorcinol	6	Launched	phosphodiesterase inhibitor	8	CA12|CA14|CA2|PTGS1	dermatology	acne vulgaris (AV)|eczema|psoriasis|seborrheic dermatitis
hsa-miR-27b-3p	MIMAT0000419	515328	0.210852	fdcyd	6	Phase 2	DNA methyltransferase inhibitor	7
hsa-miR-27b-3p	MIMAT0000419	4091	0.19867	metformin	6	Launched	insulin sensitizer	6	ACACB|PRKAB1	endocrinology	diabetes mellitus
hsa-miR-27b-3p	MIMAT0000419	440917	0.229128	D-limonene	6	Phase 1		0
hsa-miR-27b-3p	MIMAT0000419	7057924	0.201226	2-ethyl-1,3-hexanediol	6	Preclinical		0
hsa-miR-27b-3p	MIMAT0000419	6398761	0.283799	maxacalcitol	5	Launched	vitamin D receptor agonist	77	VDR	endocrinology	hyperparathyroidism
hsa-miR-27b-3p	MIMAT0000419	443980	0.22468	flumethasone-pivalate	5	Launched	glucocorticoid receptor agonist	65	NR3C1|SERPINA6	allergy	allergic rhinitis
hsa-miR-27b-3p	MIMAT0000419	6741	0.260814	methylprednisolone	5	Launched	glucocorticoid receptor agonist	65	NR3C1	endocrinology|rheumatology|dermatology|infectious disease|allergy|hematology|neurology/psychiatry|gastroenterology	hypercalcemia|thyroiditis|ankylosing spondylitis|bursitis|osteoarthritis|psoriatic arthritis|seborrheic dermatitis|mycosis|allergic rhinitis|psoriasis|anemia|multiple sclerosis|ulcerative colitis|enteritis
hsa-miR-27b-3p	MIMAT0000419	3686	0.188408	idebenone	5	Launched	calcium channel modulator	7		neurology/psychiatry|ophthalmology	Alzheimer's disease|Friedreich's ataxia|Leber hereditary optic neuropathy (LHON)
hsa-miR-27b-3p	MIMAT0000419	66377	0.190077	edoxudine	5	Launched	DNA directed DNA polymerase inhibitor	6		infectious disease	virus herpes simplex (HSV)
hsa-miR-27b-3p	MIMAT0000419	6466	0.187779	MD-920	5	Phase 1	NFkB pathway inhibitor	6	AADACL2
hsa-miR-27b-3p	MIMAT0000419	6431152	0.192428	elemene	5	Phase 3	VEGFR inhibitor	5
hsa-miR-27b-3p	MIMAT0000419	73554252	0.269591	carboplatin	5	Launched	DNA alkylating agent|DNA inhibitor	5		oncology	ovarian cancer
hsa-miR-27b-3p	MIMAT0000419	86582336	0.256288	BMS-986142	5	Phase 2	Bruton's tyrosine kinase (BTK) inhibitor	5
hsa-miR-27b-3p	MIMAT0000419	64971	0.155824	betulinic-acid	5	Phase 1/Phase 2	apoptosis stimulant|NFkB pathway inhibitor	5	GPBAR1
hsa-miR-27b-3p	MIMAT0000419	12518181	0.276461	2,3-cis/exo-pinanediol	5	Phase 1		0
hsa-miR-27b-3p	MIMAT0000419	10219606	0.228981	pinanediol	5	Preclinical		0
hsa-miR-27b-3p	MIMAT0000419	56842011	0.164696	sclareol	5	Preclinical		0
hsa-miR-27b-3p	MIMAT0000419	11468733	0.1449	hemomex-s	5	Launched		0	PPARG
hsa-miR-27b-3p	MIMAT0000419	71245042	0.174174	AC-186	4	Preclinical	estrogen receptor agonist	33	ESR2
hsa-miR-27b-3p	MIMAT0000419	5742590	0.236976	daucosterol	4	Phase 2	apoptosis stimulant	21
hsa-miR-27b-3p	MIMAT0000419	6185	0.217484	K-strophanthidin	4	Phase 2	ATPase inhibitor	14	ATP1A1
hsa-miR-27b-3p	MIMAT0000419	15478	0.178476	digoxigenin	4	Preclinical	steroid	11
hsa-miR-27b-3p	MIMAT0000419	14240392	0.154633	curcumol	4	Phase 1	JAK inhibitor	7	JAK1|JAK2|JAK3
hsa-miR-27b-3p	MIMAT0000419	9854073	0.242101	cabazitaxel	4	Launched	microtubule inhibitor	6	TUBA1A|TUBA1B|TUBA1C|TUBA3C|TUBA3D|TUBA3E|TUBA4A|TUBB|TUBB1|TUBB2A|TUBB2B|TUBB3|TUBB4A|TUBB4B|TUBB6|TUBB8	oncology	prostate cancer
hsa-miR-27b-3p	MIMAT0000419	6918141	0.260327	eldecalcitol	4	Phase 3	bone formation stimulant	4	VDR
hsa-miR-27b-3p	MIMAT0000419	5311035	0.249009	butaprost	4	Preclinical	prostaglandin receptor agonist	4
hsa-miR-27b-3p	MIMAT0000419	5321010	0.265711	oridonin	4	Preclinical	BCL inhibitor	4	BCL2
hsa-miR-27b-3p	MIMAT0000419	6474640	0.160468	1,5-dicaffeoylquinic-acid	4	Phase 1		0
hsa-miR-27b-3p	MIMAT0000419	5284587	0.180123	meprednisone	4	Launched		0	NR3C1
hsa-miR-27b-3p	MIMAT0000419	5282381	0.149893	misoprostol	3	Launched	prostanoid receptor agonist	15	PTGER2|PTGER3|PTGER4|PTGIR	gastroenterology	duodenal ulcer disease
hsa-miR-27b-3p	MIMAT0000419	5311221	0.194836	latanoprost	3	Launched	prostanoid receptor agonist	15	PTGFR	ophthalmology	ocular hypertension|glaucoma
hsa-miR-27b-3p	MIMAT0000419	90656913	0.177604	bafilomycin-a1	3	Preclinical	ATPase inhibitor	14
hsa-miR-27b-3p	MIMAT0000419	153976	0.310403	rostafuroxine	3	Phase 2	ATPase inhibitor	14	ATP1A1
hsa-miR-27b-3p	MIMAT0000419	129010087	0.197731	beta-hydroxy-beta-methylbutyrate	3	Launched	protein synthesis stimulant	10	MTOR
hsa-miR-27b-3p	MIMAT0000419	71621167	0.172945	SNG-1153	3	Preclinical	selective estrogen receptor modulator (SERM)	10	ESR1
hsa-miR-27b-3p	MIMAT0000419	5753	0.144305	corticosterone	3	Preclinical	mineralocorticoid receptor agonist	9	HSD11B1|NCOA1|NR3C2
hsa-miR-27b-3p	MIMAT0000419	148124	0.256588	docetaxel	3	Launched	tubulin polymerization inhibitor	6	BCL2|MAP2|MAP4|MAPT|NR1I2|TUBA1A|TUBA1B|TUBA1C|TUBA3C|TUBA3D|TUBA3E|TUBA4A|TUBB|TUBB1|TUBB2A|TUBB2B|TUBB3|TUBB4A|TUBB4B|TUBB6|TUBB8	oncology	breast cancer|non-small cell lung cancer (NSCLC)|prostate cancer|gastric adenocarcinoma|head and neck squamous cell carcinoma (HNSCC)
hsa-miR-27b-3p	MIMAT0000419	3001662	0.168138	schisandrol-B	3	Phase 3	lipid peroxidase inhibitor	3
hsa-miR-27b-3p	MIMAT0000419	25271978	0.171518	methsuximide	3	Launched	T-type calcium channel blocker	3	CACNA1G|CACNA1H|CACNA1I	neurology/psychiatry	seizures
hsa-miR-27b-3p	MIMAT0000419	6436	0.168185	triamcinolone-acetonide	3	Launched	glucocorticoid receptor agonist|immunosuppressant	3	NR3C1|SERPINA6	dermatology	corticosteroid-responsive dermatoses
hsa-miR-27b-3p	MIMAT0000419	6604215	0.166769	phensuximide	3	Launched	succinimide antiepileptic	3		neurology/psychiatry	seizures
hsa-miR-27b-3p	MIMAT0000419	12018336	0.181387	desvenlafaxine	3	Launched	serotoninânorepinephrine reuptake inhibitor (SNRI)	3	SLC6A2|SLC6A3|SLC6A4	neurology/psychiatry	depression
hsa-miR-27b-3p	MIMAT0000419	53629521	0.171344	bismuth-subsalicylate	3	Launched	antacid	3		gastroenterology	diarrhea
hsa-miR-27b-3p	MIMAT0000419	442343	0.149314	levomenol	3	Launched		0		neurology/psychiatry|infectious disease	spasms|skin infections
hsa-miR-27b-3p	MIMAT0000419	10477896	0.174199	perfluorohexyloctane	3	Launched		0
hsa-miR-27b-3p	MIMAT0000419	9818306	0.165851	estradiol-acetate	2	Launched	estrogen receptor agonist	33	ESR1	endocrinology|obstetrics/gynecology	menopause|vaginal atrophy
hsa-miR-27b-3p	MIMAT0000419	5318998	0.192434	licochalcone-A	2	Phase 3	topoisomerase inhibitor	13	PTPN1
hsa-miR-27b-3p	MIMAT0000419	10034073	0.163895	fidaxomicin	2	Launched	RNA polymerase inhibitor	10		gastroenterology	diarrhea
hsa-miR-27b-3p	MIMAT0000419	6858005	0.183721	abamectin	2	Launched	benzodiazepine receptor agonist	7	GABBR1|GABBR2	infectious disease	gastrointestinal parasites
hsa-miR-27b-3p	MIMAT0000419	11967282	0.175708	vinflunine	2	Launched	microtubule inhibitor	6		oncology	bladder cancer
hsa-miR-27b-3p	MIMAT0000419	82153	0.165741	flunisolide	2	Launched	cytochrome P450 inhibitor	4	NR3C1	allergy	allergic rhinitis
hsa-miR-27b-3p	MIMAT0000419	47936	0.182559	colforsin	2	Phase 2	adenylyl cyclase activator	3	ADCY2|ADCY5
hsa-miR-27b-3p	MIMAT0000419	222757	0.21858	estradiol-benzoate	2	Preclinical	contraceptive agent	2	ESR1
hsa-miR-27b-3p	MIMAT0000419	457831	0.186902	plicamycin	2	Launched	alcohol dehydrogenase inhibitor	2		oncology|endocrinology	testicular carcinoma|Paget's disease|hypercalcemia
hsa-miR-27b-3p	MIMAT0000419	92043331	0.178815	ferroquine	2	Phase 2	antimalarial agent	2
hsa-miR-27b-3p	MIMAT0000419	441852	0.175712	convallatoxin	2	Preclinical	cardiac glycoside	2
hsa-miR-27b-3p	MIMAT0000419	164676	0.156427	tanshinone-IIA	2	Phase 2/Phase 3	anti-inflammatory agent|interleukin inhibitor	2	IL1B|NR1I2|TNF
hsa-miR-27b-3p	MIMAT0000419	457964	0.186096	aphidicolin	2	Phase 1	RNA synthesis inhibitor	2
hsa-miR-27b-3p	MIMAT0000419	5360807	0.180486	lasalocid	2	Launched	bacterial permeability inducer	2		infectious disease	coccidiosis
hsa-miR-27b-3p	MIMAT0000419	5282226	0.254516	travoprost	1	Launched	prostanoid receptor agonist	15	PTGFR	ophthalmology	ocular hypertension|glaucoma
hsa-miR-27b-3p	MIMAT0000419	42890	0.248102	idarubicin	1	Launched	topoisomerase inhibitor	13	TOP2A	hematologic malignancy	acute myeloid leukemia (AML)
hsa-miR-27b-3p	MIMAT0000419	3035016	0.217424	amrubicin	1	Launched	topoisomerase inhibitor	13	TOP2A|TOP2B	oncology	small cell lung cancer
hsa-miR-27b-3p	MIMAT0000419	86289437	0.175708	aclarubicin	1	Launched	topoisomerase inhibitor	13	TOP1|TOP2A	hematologic malignancy	acute myeloid leukemia (AML)
hsa-miR-27b-3p	MIMAT0000419	5311097	0.157846	LY344864	1	Preclinical	serotonin receptor agonist	8	HTR1A|HTR1B|HTR1D|HTR1E|HTR1F|HTR2A|HTR2B|HTR2C|HTR7
hsa-miR-27b-3p	MIMAT0000419	5311497	0.177766	vinorelbine	1	Launched	tubulin polymerization inhibitor	6	TUBA1A|TUBA1B|TUBA1C|TUBA3C|TUBA3D|TUBA3E|TUBA4A|TUBB|TUBB1|TUBB2A|TUBB2B|TUBB3|TUBB4A|TUBB4B|TUBB6|TUBB8	oncology	non-small cell lung cancer (NSCLC)
hsa-miR-27b-3p	MIMAT0000419	65655	0.196565	amtolmetin-guacil	1	Launched	cyclooxygenase inhibitor	5	PTGS1|PTGS2	rheumatology	rheumatoid arthritis|osteoarthritis
hsa-miR-27b-3p	MIMAT0000419	444029	0.234214	colforsin-daproate	1	Launched	adenylyl cyclase activator	3
hsa-miR-27b-3p	MIMAT0000419	58144	0.198137	CY208-243	1	Phase 2	dopamine receptor agonist	2	CALY
hsa-miR-27b-3p	MIMAT0000419	71353	0.194113	dapoxetine	1	Launched	selective serotonin reuptake inhibitor (SSRI)	2	HTR1A|HTR1B|HTR2C|SLC6A4	urology	premature ejaculation (PE)
hsa-miR-27b-3p	MIMAT0000419	657320	0.15625	fluoxetine	1	Launched	selective serotonin reuptake inhibitor (SSRI)	2	ANO1|HTR2B|SLC6A4	neurology/psychiatry	depression|obsessive compulsive disorder (OCD)|bulimia nervosa|panic disorders|bipolar disorder
hsa-miR-27b-3p	MIMAT0000419	6890	0.194088	gramine	1	Preclinical	norepinephrine reputake inhibitor	1
hsa-miR-27b-3p	MIMAT0000419	3712	0.173923	indole-3-carbinol	1	Phase 2/Phase 3	aryl hydrocarbon receptor agonist|indoleamine 2,3-dioxygenase inhibitor	1	AHR
hsa-miR-27b-3p	MIMAT0000419	5318517	0.16869	andrographolide	1	Phase 2	tumor necrosis factor production inhibitor	1	IL1B|IL6|NFKB1|NFKB2|TNF
hsa-miR-27b-3p	MIMAT0000419	9868491	0.168567	tafluprost	1	Launched	prostaglandin inhibitor	1	PTGFR	ophthalmology	glaucoma|ocular hypertension
hsa-miR-27b-3p	MIMAT0000419	30323	0.163617	daunorubicin	1	Launched	RNA synthesis inhibitor|topoisomerase inhibitor	1	TOP2A|TOP2B	hematologic malignancy	acute myeloid leukemia (AML)|acute lymphoblastic leukemia (ALL)
hsa-miR-27b-3p	MIMAT0000419	3036	0.210252	4,4'-DDT	1	Preclinical		0
hsa-miR-27b-3p	MIMAT0000419	76961845	0.160956	flumecinol	1	Launched		0
hsa-miR-27b-3p	MIMAT0000419	5280795	0.148843	cholecalciferol	1	Launched		0	VDR	endocrinology	vitamin D deficiency
hsa-miR-27b-3p	MIMAT0000419	11957647	0.148725	C106	1	Phase 3		0
hsa-miR-27b-3p	MIMAT0000419	5284613	0.146265	proscillaridin-A	1	Launched		0		cardiology	congestive heart failure|cardiac arrythmia
hsa-miR-29b-3p	MIMAT0000100	31307	0.118723	triamcinolone	10	Launched	glucocorticoid receptor agonist	65	NR3C1	dermatology	corticosteroid-responsive dermatoses
hsa-miR-29b-3p	MIMAT0000100	9386	0.134905	perfluorodecalin	10	Launched		0		dermatology	cosmetic
hsa-miR-29b-3p	MIMAT0000100	16490	0.116692	flumethasone	9	Launched	glucocorticoid receptor agonist	65	NR3C1|PLA2G1B	otolaryngology|infectious disease|dermatology	otitis|ear infections|corticosteroid-responsive dermatoses
hsa-miR-29b-3p	MIMAT0000100	261004	0.109797	arsenic-trioxide	9	Launched	apoptosis stimulant	21	AKT1|CCND1|IKBKB|JUN|MAPK1|MAPK3|TXNRD1	gastroenterology	diarrhea
hsa-miR-29b-3p	MIMAT0000100	60198	0.155445	exemestane	9	Launched	aromatase inhibitor	9	CYP19A1	oncology	breast cancer
hsa-miR-29b-3p	MIMAT0000100	168049	0.101768	C11-Acetate	9	Phase 3		0	ABAT|ACE|AKR1C3|CA2|CELA1|ESR2|FFAR2|FFAR3|HPRT1|LTA4H|MMP12|NOS1|NOS3|PLA2G1B|PTPN1|SOD1|TXN
hsa-miR-29b-3p	MIMAT0000100	68929	0.0946159	epiestriol	9	Preclinical		0
hsa-miR-29b-3p	MIMAT0000100	9547243	0.119908	ercalcitriol	9	Phase 1	vitamin D receptor agonist	77	VDR
hsa-miR-29b-3p	MIMAT0000100	5282190	0.0910567	falecalcitriol	8	Launched	vitamin D receptor agonist	77	VDR	endocrinology	hyperparathyroidism
hsa-miR-29b-3p	MIMAT0000100	5281104	0.156946	paricalcitol	8	Launched	vitamin D receptor agonist	77	VDR	nephrology|endocrinology	chronic kidney disease (CKD)|hyperthyroidism
hsa-miR-29b-3p	MIMAT0000100	25068278	0.101279	17-PA	8	Preclinical	glucocorticoid receptor agonist	65
hsa-miR-29b-3p	MIMAT0000100	5281243	0.137965	lutein	8	Launched	antioxidant	27		ophthalmology	macular degeneration|cataracts|retinitis pigmentosa (RP)
hsa-miR-29b-3p	MIMAT0000100	5281224	0.100334	astaxanthin	8	Launched	antioxidant	27
hsa-miR-29b-3p	MIMAT0000100	159269	0.127667	telbivudine	8	Launched	DNA polymerase inhibitor	17		infectious disease	hepatitis B
hsa-miR-29b-3p	MIMAT0000100	2577	0.0889583	carmofur	8	Launched	thymidylate synthase inhibitor	15	TYMS	oncology	breast cancer|colorectal cancer
hsa-miR-29b-3p	MIMAT0000100	223997	0.122321	adrenosterone	8	Preclinical	11-beta hydroxysteroid dehydrogenase inhibitor	9	HSD11B1|HSD11B2
hsa-miR-29b-3p	MIMAT0000100	854498	0.150735	sobrepin	8	Launched	mucolytic agent	8		pulmonary	chest congestion
hsa-miR-29b-3p	MIMAT0000100	72326	0.142784	NSC-4644	8	Phase 2	ACAT inhibitor|sterol regulatory element binding protein (SREBP) inhibitor	8	PYGM
hsa-miR-29b-3p	MIMAT0000100	6439522	0.0899627	tapinarof	8	Phase 3	aryl hydrocarbon receptor agonist	8
hsa-miR-29b-3p	MIMAT0000100	5284500	0.119716	camphor-(1R)	8	Phase 1	TRPV activator	8	TRPV1
hsa-miR-29b-3p	MIMAT0000100	154272	0.0876016	10-deacetylbaccatin	8	Preclinical	antitumor agent	8
hsa-miR-29b-3p	MIMAT0000100	5288845	0.102097	hexylene-glycol	8	Preclinical		0	AKR1C3|CTPS1|DLG4|HSP90AA1|NOS3|PGF|PLA2G1B|PTPN1|SELP
hsa-miR-29b-3p	MIMAT0000100	46931009	0.139164	doxercalciferol	7	Launched	vitamin D receptor agonist	77	VDR	nephrology|endocrinology	chronic kidney disease (CKD)|hyperparathyroidism
hsa-miR-29b-3p	MIMAT0000100	5282181	0.101857	alfacalcidol	7	Launched	vitamin D receptor agonist	77	CYP27B1|VDR	endocrinology	vitamin D deficiency
hsa-miR-29b-3p	MIMAT0000100	5288783	0.10017	calcipotriol	7	Launched	vitamin D receptor agonist	77	VDR	dermatology	psoriasis
hsa-miR-29b-3p	MIMAT0000100	5865	0.103016	prednisone	7	Launched	glucocorticoid receptor agonist	65	HSD11B1|NR3C1	endocrinology|rheumatology|infectious disease|dermatology|ophthalmology|hematology|gastroenterology|neurology/psychiatry	congenital adrenal hyperplasia|hypercalcemia|rheumatoid arthritis|psoriatic arthritis|ankylosing spondylitis|bursitis|osteoarthritis|epicondylitis|dermatomyositis|psoriasis|mycosis|conjunctivitis|anemia|ulcerative colitis|enteritis|multiple sclerosis|meningitis
hsa-miR-29b-3p	MIMAT0000100	667476	0.0968301	dienestrol	7	Launched	estrogen receptor agonist	33	ESR1	endocrinology	menopause
hsa-miR-29b-3p	MIMAT0000100	5756	0.110935	estriol	7	Launched	estrogen receptor agonist	33	ESR1|ESR2	endocrinology|obstetrics/gynecology|infectious disease	menopause|vaginal atrophy|urinary tract infections
hsa-miR-29b-3p	MIMAT0000100	3994	0.185218	M-344	7	Preclinical	HDAC inhibitor	22	HDAC8
hsa-miR-29b-3p	MIMAT0000100	6918391	0.104335	beta-elemene	7	Launched	apoptosis stimulant	21	MMP2|MMP9
hsa-miR-29b-3p	MIMAT0000100	5881	0.117917	dehydroepiandrosterone	7	Launched	protein synthesis stimulant	10	ESR1|ESR2|G6PD|GABRA1|GABRA2|GABRA3|GABRA4|GABRA5|GABRA6|GABRB1|GABRB2|GABRB3|GABRD|GABRE|GABRG1|GABRG2|GABRG3|GABRP|GABRQ|GRIN1|GRIN2A|GRIN2B|GRIN2C|GRIN2D|GRIN3A|GRIN3B|HSD17B1|NR1I2|NR1I3|PPARA|SIGMAR1|SULT2A1|SULT2B1	endocrinology	menopause
hsa-miR-29b-3p	MIMAT0000100	192197	0.108342	hexestrol	7	Launched	synthetic estrogen	8	AKR1C1|ESR1|ESR2	endocrinology	hypoestrogenism
hsa-miR-29b-3p	MIMAT0000100	10044	0.16429	triptan	7	Phase 1	serotonin receptor agonist	8	HTR1B|HTR1D
hsa-miR-29b-3p	MIMAT0000100	5280793	0.130711	ergocalciferol	7	Launched	vitamin analog	7	VDR	endocrinology|orthopedics	hypoparathyroidism|rickets|hypophosphatemia
hsa-miR-29b-3p	MIMAT0000100	5280489	0.10154	beta-carotene	7	Launched		0
hsa-miR-29b-3p	MIMAT0000100	442514	0.0988379	hematoxylin	7	Preclinical		0
hsa-miR-29b-3p	MIMAT0000100	5283748	0.115559	secalciferol	6	Launched	vitamin D receptor agonist	77	VDR	critical care	bone fracture
hsa-miR-29b-3p	MIMAT0000100	94141	0.0841697	NPC-01	6	Phase 3	steroid	11
hsa-miR-29b-3p	MIMAT0000100	5790	0.110496	floxuridine	6	Launched	DNA synthesis inhibitor	10	TYMS	oncology	colorectal cancer
hsa-miR-29b-3p	MIMAT0000100	6166	0.122637	desoxycortone	6	Preclinical	mineralocorticoid receptor agonist	9	NR3C1|NR3C2
hsa-miR-29b-3p	MIMAT0000100	5281515	0.0933826	g-caryophyllene	6	Preclinical	acetylcholinesterase inhibitor	8	ACHE
hsa-miR-29b-3p	MIMAT0000100	5054	0.0883866	resorcinol	6	Launched	phosphodiesterase inhibitor	8	CA12|CA14|CA2|PTGS1	dermatology	acne vulgaris (AV)|eczema|psoriasis|seborrheic dermatitis
hsa-miR-29b-3p	MIMAT0000100	515328	0.13214	fdcyd	6	Phase 2	DNA methyltransferase inhibitor	7
hsa-miR-29b-3p	MIMAT0000100	6971205	0.104747	curcumin	6	Launched	cyclooxygenase inhibitor|histone acetyltransferase inhibitor|lipoxygenase inhibitor|NFkB pathway inhibitor	6	APP|CA1|CA12|CA14|CA2|CA4|CA6|CA9|CHRM3|CYP3A4|DNMT3B|EP300|MMP13|MMP9|NOS2|PTGS1|PTGS2|XDH
hsa-miR-29b-3p	MIMAT0000100	9062	0.239419	2-deoxyglucose	6	Phase 2	glycolysis inhibitor	6	SLC2A1|SLC2A2|SLC2A3|SLC2A4
hsa-miR-29b-3p	MIMAT0000100	4055	0.0864396	menadione	6	Launched	mitochondrial DNA polymerase inhibitor|phosphatase inhibitor	6	AOX1|BGLAP|F10|F2|F7|F9|GGCX|NQO1|NQO2|PROC|PROS1|PROZ|VKORC1|VKORC1L1	gastroenterology|neurology/psychiatry|dermatology|rheumatology	ulcerative colitis|diarrhea|headache|varicose veins|rheumatoid arthritis
hsa-miR-29b-3p	MIMAT0000100	4091	0.0863115	metformin	6	Launched	insulin sensitizer	6	ACACB|PRKAB1	endocrinology	diabetes mellitus
hsa-miR-29b-3p	MIMAT0000100	440917	0.0936194	D-limonene	6	Phase 1		0
hsa-miR-29b-3p	MIMAT0000100	446098	0.12884	2-fluorofucose	6	Phase 1		0
hsa-miR-29b-3p	MIMAT0000100	7057924	0.112214	2-ethyl-1,3-hexanediol	6	Preclinical		0
hsa-miR-29b-3p	MIMAT0000100	11332752	0.0868588	shikimic-acid	6	Preclinical		0
hsa-miR-29b-3p	MIMAT0000100	159055	0.123341	camphor-(+)	6	Phase 2		0
hsa-miR-29b-3p	MIMAT0000100	6398761	0.107304	maxacalcitol	5	Launched	vitamin D receptor agonist	77	VDR	endocrinology	hyperparathyroidism
hsa-miR-29b-3p	MIMAT0000100	6741	0.0963122	methylprednisolone	5	Launched	glucocorticoid receptor agonist	65	NR3C1	endocrinology|rheumatology|dermatology|infectious disease|allergy|hematology|neurology/psychiatry|gastroenterology	hypercalcemia|thyroiditis|ankylosing spondylitis|bursitis|osteoarthritis|psoriatic arthritis|seborrheic dermatitis|mycosis|allergic rhinitis|psoriasis|anemia|multiple sclerosis|ulcerative colitis|enteritis
hsa-miR-29b-3p	MIMAT0000100	73581	0.0925196	bilobalide	5	Preclinical	GABA receptor modulator	11	GLRA1|GLRA2|GLRB|HTR3A|HTR3B
hsa-miR-29b-3p	MIMAT0000100	56208	0.0935167	sarafloxacin	5	Launched	bacterial DNA gyrase inhibitor	10		infectious disease	gram-negative bacterial infections|gram-positive bacterial infections
hsa-miR-29b-3p	MIMAT0000100	3686	0.1033	idebenone	5	Launched	calcium channel modulator	7		neurology/psychiatry|ophthalmology	Alzheimer's disease|Friedreich's ataxia|Leber hereditary optic neuropathy (LHON)
hsa-miR-29b-3p	MIMAT0000100	61041	0.132593	safranal	5	Phase 2	benzodiazepine receptor agonist	7	GABBR1
hsa-miR-29b-3p	MIMAT0000100	66377	0.153546	edoxudine	5	Launched	DNA directed DNA polymerase inhibitor	6		infectious disease	virus herpes simplex (HSV)
hsa-miR-29b-3p	MIMAT0000100	6466	0.0889335	MD-920	5	Phase 1	NFkB pathway inhibitor	6	AADACL2
hsa-miR-29b-3p	MIMAT0000100	6431152	0.0859327	elemene	5	Phase 3	VEGFR inhibitor	5
hsa-miR-29b-3p	MIMAT0000100	33039	0.132144	alovudine	5	Phase 2	DNA synthesis marker	5
hsa-miR-29b-3p	MIMAT0000100	11213350	0.126718	S-111	5	Phase 2	PARP inhibitor	5	PARP1
hsa-miR-29b-3p	MIMAT0000100	64971	0.112092	betulinic-acid	5	Phase 1/Phase 2	apoptosis stimulant|NFkB pathway inhibitor	5	GPBAR1
hsa-miR-29b-3p	MIMAT0000100	445913	0.199432	2-fluoro-2-deoxy-D-galactose	5	Phase 1		0	LCT
hsa-miR-29b-3p	MIMAT0000100	12518181	0.119037	2,3-cis/exo-pinanediol	5	Phase 1		0
hsa-miR-29b-3p	MIMAT0000100	36689751	0.112626	tetroquinone	5	Preclinical		0
hsa-miR-29b-3p	MIMAT0000100	5146	0.0954155	salicyl-alcohol	5	Preclinical		0
hsa-miR-29b-3p	MIMAT0000100	5997	0.0926357	cholesterol	5	Preclinical		0	RORA
hsa-miR-29b-3p	MIMAT0000100	10219606	0.0838837	pinanediol	5	Preclinical		0
hsa-miR-29b-3p	MIMAT0000100	56842011	0.105411	sclareol	5	Preclinical		0
hsa-miR-29b-3p	MIMAT0000100	11468733	0.103157	hemomex-s	5	Launched		0	PPARG
hsa-miR-29b-3p	MIMAT0000100	5311067	0.0857012	desoximetasone	4	Launched	glucocorticoid receptor agonist	65	NR3C1|PLA2G1B	dermatology	corticosteroid-responsive dermatoses
hsa-miR-29b-3p	MIMAT0000100	71245042	0.0854886	AC-186	4	Preclinical	estrogen receptor agonist	33	ESR2
hsa-miR-29b-3p	MIMAT0000100	71311876	0.123097	MC1568	4	Preclinical	HDAC inhibitor	22	HDAC2
hsa-miR-29b-3p	MIMAT0000100	5742590	0.0959822	daucosterol	4	Phase 2	apoptosis stimulant	21
hsa-miR-29b-3p	MIMAT0000100	6918305	0.130638	ganaxolone	4	Phase 3	GABA receptor modulator	11	GABRA1|GABRA2|GABRA3|GABRA4|GABRA5|GABRA6
hsa-miR-29b-3p	MIMAT0000100	15478	0.0881765	digoxigenin	4	Preclinical	steroid	11
hsa-miR-29b-3p	MIMAT0000100	14240392	0.0949403	curcumol	4	Phase 1	JAK inhibitor	7	JAK1|JAK2|JAK3
hsa-miR-29b-3p	MIMAT0000100	4760	0.092682	phenindione	4	Launched	vitamin K antagonist	5	VKORC1	hematology	deep vein thrombosis (DVT)
hsa-miR-29b-3p	MIMAT0000100	31402	0.105488	eltanolone	4	Phase 3	GABA receptor positive allosteric modulator	4	GABRA1|GABRA2|GABRA3|GABRA4|GABRA5|GABRA6|GABRB2|GABRG2
hsa-miR-29b-3p	MIMAT0000100	8955	0.0987305	pregnenolone	4	Launched	glutamate receptor modulator	4	SULT2B1	rheumatology	rheumatoid arthritis
hsa-miR-29b-3p	MIMAT0000100	6918141	0.0950321	eldecalcitol	4	Phase 3	bone formation stimulant	4	VDR
hsa-miR-29b-3p	MIMAT0000100	21584481	0.123329	DMSO	4	Preclinical	control vehicle	4
hsa-miR-29b-3p	MIMAT0000100	5321010	0.120947	oridonin	4	Preclinical	BCL inhibitor	4	BCL2
hsa-miR-29b-3p	MIMAT0000100	439710	0.123014	L-(+)-rhamnose-monohydrate	4	Preclinical		0
hsa-miR-29b-3p	MIMAT0000100	5280794	0.0865709	stigmasterol	4	Preclinical		0
hsa-miR-29b-3p	MIMAT0000100	638015	0.103195	retinaldehyde	4	Launched		0		dermatology	cosmetic
hsa-miR-29b-3p	MIMAT0000100	53340666	0.154814	ACY-1215	3	Phase 1/Phase 2	HDAC inhibitor	22	HDAC1|HDAC2|HDAC3|HDAC6|HDAC8
hsa-miR-29b-3p	MIMAT0000100	5283066	0.129672	16,16-dimethylprostaglandin-e2	3	Phase 2	prostanoid receptor agonist	15	HPGD
hsa-miR-29b-3p	MIMAT0000100	90656913	0.107403	bafilomycin-a1	3	Preclinical	ATPase inhibitor	14
hsa-miR-29b-3p	MIMAT0000100	2374	0.0833749	BHQ	3	Preclinical	ATPase inhibitor	14	ATP2A1
hsa-miR-29b-3p	MIMAT0000100	10631	0.0846273	medroxyprogesterone	3	Launched	progesterone receptor agonist	11	PGR	endocrinology	contraceptive
hsa-miR-29b-3p	MIMAT0000100	442424	0.14131	genipin	3	Preclinical	choleretic agent	3
hsa-miR-29b-3p	MIMAT0000100	5280934	0.122294	alpha-linolenic-acid	3	Phase 3	omega 3 fatty acid stimulant	3	ELOVL4|FADS1|FADS2|FFAR1|FFAR4|PTGS2|SLC8A1|TRPV1
hsa-miR-29b-3p	MIMAT0000100	369312	0.106532	perillyl-alcohol	3	Phase 2	apoptosis stimulant|farnesyltransferase inhibitor	3	FNTA
hsa-miR-29b-3p	MIMAT0000100	10041070	0.102499	altrenogest	3	Launched	progestogen hormone	3	PGR	endocrinology	estrus
hsa-miR-29b-3p	MIMAT0000100	984	0.0926325	1-hexadecanal	3	Preclinical	sphingosine 1-phosphate receptor substrate	3	DBI|RHO
hsa-miR-29b-3p	MIMAT0000100	6444206	0.0967342	azalomycin-B	3	Preclinical	bacterial 50S ribosomal subunit inhibitor	3
hsa-miR-29b-3p	MIMAT0000100	441921	0.101104	ginsenoside-RE	3	Phase 1	anti-inflammatory agent	3
hsa-miR-29b-3p	MIMAT0000100	6857365	0.120482	sodium-ascorbate	3	Launched		0
hsa-miR-29b-3p	MIMAT0000100	14709	0.0839279	prasterone-acetate	3	Preclinical		0
hsa-miR-29b-3p	MIMAT0000100	26133	0.083813	hydrocortisone-butyrate	2	Launched	glucocorticoid receptor agonist	65	NR3C1	dermatology	corticosteroid-responsive dermatoses|eczema
hsa-miR-29b-3p	MIMAT0000100	53340426	0.0933639	citarinostat	2	Phase 1	HDAC inhibitor	22
hsa-miR-29b-3p	MIMAT0000100	6438378	0.105414	limaprost-alfadex	2	Launched	prostanoid receptor agonist	15	PTGER1	cardiology	claudication
hsa-miR-29b-3p	MIMAT0000100	5280723	0.0896283	alprostadil	2	Launched	prostanoid receptor agonist	15	CATSPER1|CATSPER2|CATSPER3|CATSPER4|PTGDR|PTGER1|PTGER2|PTGER4|PTGIR	cardiology	congenital heart defects
hsa-miR-29b-3p	MIMAT0000100	5280363	0.0906503	dinoprost	2	Launched	prostacyclin analog	2	PTGDR|PTGDR2|PTGER1|PTGER2|PTGER3|PTGER4|PTGFR|TBXA2R	obstetrics/gynecology	labor induction
hsa-miR-29b-3p	MIMAT0000100	38988322	0.0886414	3-(4-methylbenzylidene)camphor	2	Launched	endocrine disruptor	2		dermatology	sunscreen lotion
hsa-miR-29b-3p	MIMAT0000100	6155526	0.0978416	trans-4-hydroxycrotonic-acid	2	Preclinical	gamma hydroxybutyric acid ligand	2
hsa-miR-29b-3p	MIMAT0000100	259994	0.0954269	propylene-glycol	2	Launched		0
hsa-miR-29b-3p	MIMAT0000100	1549082	0.0919454	gluconolactone	2	Launched		0	LCT
hsa-miR-29b-3p	MIMAT0000100	5447	0.0910876	thiodiglycol	2	Preclinical		0
hsa-miR-29b-3p	MIMAT0000100	5192	0.08449	disodium-sebacate	2	Phase 1		0	HBB
hsa-miR-29b-3p	MIMAT0000100	68406	0.111963	1-octacosanol	2	Phase 2		0
hsa-miR-29b-3p	MIMAT0000100	2734086	0.0937339	A0001	2	Phase 2		0
hsa-miR-29b-3p	MIMAT0000100	448537	0.10939	diethylstilbestrol	1	Withdrawn	estrogen receptor agonist	33	ESR1|ESR2|ESRRB|ESRRG
hsa-miR-29b-3p	MIMAT0000100	91469	0.0862699	equol	1	Launched	estrogen receptor agonist	33	ESR1|ESR2
hsa-miR-29b-3p	MIMAT0000100	444305	0.0827389	tartaric-acid	1	Launched	antioxidant	27
hsa-miR-29b-3p	MIMAT0000100	4369270	0.0947339	digitoxigenin	1	Preclinical	ATPase inhibitor	14	ATP1A1
hsa-miR-29b-3p	MIMAT0000100	13049027	0.0904887	loxoprofen	1	Launched	cyclooxygenase inhibitor|prostanoid receptor antagonist	2	PTGS2	neurology/psychiatry	pain relief
hsa-miR-29b-3p	MIMAT0000100	9831415	0.0850308	omega-3-acid-esters	1	Launched	cholesterol inhibitor	2
hsa-miR-29b-3p	MIMAT0000100	446284	0.155258	icosapent	1	Launched	platelet aggregation inhibitor	1	ACSL3|ACSL4|FADS1|FFAR1|PPARD|PPARG|PTGS1|PTGS2|SLC8A1|TRPV1	endocrinology	hypertriglyceridemia
hsa-miR-29b-3p	MIMAT0000100	5283157	0.107627	20-HETE	1	Preclinical	ion channel antagonist	1
hsa-miR-29b-3p	MIMAT0000100	16760536	0.103768	elactocin	1	Phase 1	exportin antagonist	1	XPO1
hsa-miR-29b-3p	MIMAT0000100	123964	0.082952	ASA-404	1	Phase 3	angiogenesis inhibitor	1
hsa-miR-29b-3p	MIMAT0000100	2682	0.0972658	1-hexadecanol	1	Launched		0		dermatology	cosmetic
hsa-miR-29b-3p	MIMAT0000100	957	0.0888486	1-octanol	1	Phase 2		0	GJA1|GJA10|GJA3|GJA4|GJA5|GJA8|GJA9|GJB1|GJB2|GJB3|GJB4|GJB5|GJB6|GJB7|GJC1|GJC2|GJC3|GJD2|GJD3|GJD4|GJE1
hsa-miR-29b-3p	MIMAT0000100	73415990	0.087695	2-octyldodecan-1-ol	1	Preclinical		0
hsa-miR-29c-3p	MIMAT0000681	31307	0.0386133	triamcinolone	10	Launched	glucocorticoid receptor agonist	65	NR3C1	dermatology	corticosteroid-responsive dermatoses
hsa-miR-29c-3p	MIMAT0000681	9386	0.047412	perfluorodecalin	10	Launched		0		dermatology	cosmetic
hsa-miR-29c-3p	MIMAT0000681	5288149	0.0165641	seocalcitol	9	Phase 3	vitamin D receptor agonist	77	VDR
hsa-miR-29c-3p	MIMAT0000681	16490	0.037852	flumethasone	9	Launched	glucocorticoid receptor agonist	65	NR3C1|PLA2G1B	otolaryngology|infectious disease|dermatology	otitis|ear infections|corticosteroid-responsive dermatoses
hsa-miR-29c-3p	MIMAT0000681	66414	0.0415369	2-methoxyestradiol	9	Phase 2	hypoxia inducible factor inhibitor	9	COMT|CYP19A1|CYP1A1|CYP1B1|HIF1A|TUBB
hsa-miR-29c-3p	MIMAT0000681	60198	0.0405815	exemestane	9	Launched	aromatase inhibitor	9	CYP19A1	oncology	breast cancer
hsa-miR-29c-3p	MIMAT0000681	168049	0.0215007	C11-Acetate	9	Phase 3		0	ABAT|ACE|AKR1C3|CA2|CELA1|ESR2|FFAR2|FFAR3|HPRT1|LTA4H|MMP12|NOS1|NOS3|PLA2G1B|PTPN1|SOD1|TXN
hsa-miR-29c-3p	MIMAT0000681	68929	0.0493588	epiestriol	9	Preclinical		0
hsa-miR-29c-3p	MIMAT0000681	9547243	0.0192732	ercalcitriol	9	Phase 1	vitamin D receptor agonist	77	VDR
hsa-miR-29c-3p	MIMAT0000681	5283731	0.0185156	calcifediol	8	Launched	vitamin D receptor agonist	77	VDR	endocrinology	hyperparathyroidism
hsa-miR-29c-3p	MIMAT0000681	5281104	0.0320835	paricalcitol	8	Launched	vitamin D receptor agonist	77	VDR	nephrology|endocrinology	chronic kidney disease (CKD)|hyperthyroidism
hsa-miR-29c-3p	MIMAT0000681	25068278	0.02473	17-PA	8	Preclinical	glucocorticoid receptor agonist	65
hsa-miR-29c-3p	MIMAT0000681	5281243	0.0215576	lutein	8	Launched	antioxidant	27		ophthalmology	macular degeneration|cataracts|retinitis pigmentosa (RP)
hsa-miR-29c-3p	MIMAT0000681	5281224	0.020246	astaxanthin	8	Launched	antioxidant	27
hsa-miR-29c-3p	MIMAT0000681	159269	0.026847	telbivudine	8	Launched	DNA polymerase inhibitor	17		infectious disease	hepatitis B
hsa-miR-29c-3p	MIMAT0000681	2577	0.0411786	carmofur	8	Launched	thymidylate synthase inhibitor	15	TYMS	oncology	breast cancer|colorectal cancer
hsa-miR-29c-3p	MIMAT0000681	223997	0.0450646	adrenosterone	8	Preclinical	11-beta hydroxysteroid dehydrogenase inhibitor	9	HSD11B1|HSD11B2
hsa-miR-29c-3p	MIMAT0000681	854498	0.0336851	sobrepin	8	Launched	mucolytic agent	8		pulmonary	chest congestion
hsa-miR-29c-3p	MIMAT0000681	6439522	0.0405207	tapinarof	8	Phase 3	aryl hydrocarbon receptor agonist	8
hsa-miR-29c-3p	MIMAT0000681	73415769	0.0253349	bismuth-subgallate	8	Launched	nitric oxide synthase inhibitor	8	NOS1	gastroenterology	internal deoderant
hsa-miR-29c-3p	MIMAT0000681	72326	0.0244669	NSC-4644	8	Phase 2	ACAT inhibitor|sterol regulatory element binding protein (SREBP) inhibitor	8	PYGM
hsa-miR-29c-3p	MIMAT0000681	154272	0.0455792	10-deacetylbaccatin	8	Preclinical	antitumor agent	8
hsa-miR-29c-3p	MIMAT0000681	5284500	0.0219334	camphor-(1R)	8	Phase 1	TRPV activator	8	TRPV1
hsa-miR-29c-3p	MIMAT0000681	1174	0.0519978	uracil	8	Launched		0	DPYD|UCKL1
hsa-miR-29c-3p	MIMAT0000681	46931009	0.0172302	doxercalciferol	7	Launched	vitamin D receptor agonist	77	VDR	nephrology|endocrinology	chronic kidney disease (CKD)|hyperparathyroidism
hsa-miR-29c-3p	MIMAT0000681	5288783	0.0164243	calcipotriol	7	Launched	vitamin D receptor agonist	77	VDR	dermatology	psoriasis
hsa-miR-29c-3p	MIMAT0000681	5865	0.0224372	prednisone	7	Launched	glucocorticoid receptor agonist	65	HSD11B1|NR3C1	endocrinology|rheumatology|infectious disease|dermatology|ophthalmology|hematology|gastroenterology|neurology/psychiatry	congenital adrenal hyperplasia|hypercalcemia|rheumatoid arthritis|psoriatic arthritis|ankylosing spondylitis|bursitis|osteoarthritis|epicondylitis|dermatomyositis|psoriasis|mycosis|conjunctivitis|anemia|ulcerative colitis|enteritis|multiple sclerosis|meningitis
hsa-miR-29c-3p	MIMAT0000681	667476	0.0490507	dienestrol	7	Launched	estrogen receptor agonist	33	ESR1	endocrinology	menopause
hsa-miR-29c-3p	MIMAT0000681	5756	0.0458665	estriol	7	Launched	estrogen receptor agonist	33	ESR1|ESR2	endocrinology|obstetrics/gynecology|infectious disease	menopause|vaginal atrophy|urinary tract infections
hsa-miR-29c-3p	MIMAT0000681	3994	0.062368	M-344	7	Preclinical	HDAC inhibitor	22	HDAC8
hsa-miR-29c-3p	MIMAT0000681	27125	0.0292993	estetrol	7	Phase 3	selective estrogen receptor modulator (SERM)	10	ESR1
hsa-miR-29c-3p	MIMAT0000681	5881	0.0187084	dehydroepiandrosterone	7	Launched	protein synthesis stimulant	10	ESR1|ESR2|G6PD|GABRA1|GABRA2|GABRA3|GABRA4|GABRA5|GABRA6|GABRB1|GABRB2|GABRB3|GABRD|GABRE|GABRG1|GABRG2|GABRG3|GABRP|GABRQ|GRIN1|GRIN2A|GRIN2B|GRIN2C|GRIN2D|GRIN3A|GRIN3B|HSD17B1|NR1I2|NR1I3|PPARA|SIGMAR1|SULT2A1|SULT2B1	endocrinology	menopause
hsa-miR-29c-3p	MIMAT0000681	5870	0.0384187	estrone	7	Launched	estrogen receptor agonist|estrogenic hormone	9	ESR1|ESR2	endocrinology	menopause
hsa-miR-29c-3p	MIMAT0000681	192197	0.0727566	hexestrol	7	Launched	synthetic estrogen	8	AKR1C1|ESR1|ESR2	endocrinology	hypoestrogenism
hsa-miR-29c-3p	MIMAT0000681	10044	0.0151123	triptan	7	Phase 1	serotonin receptor agonist	8	HTR1B|HTR1D
hsa-miR-29c-3p	MIMAT0000681	5280793	0.0198713	ergocalciferol	7	Launched	vitamin analog	7	VDR	endocrinology|orthopedics	hypoparathyroidism|rickets|hypophosphatemia
hsa-miR-29c-3p	MIMAT0000681	6256	0.0285219	trifluridine	7	Launched	DNA directed DNA polymerase inhibitor|thymidylate synthase inhibitor	7	TYMS	infectious disease	virus herpes simplex (HSV)
hsa-miR-29c-3p	MIMAT0000681	5280489	0.0314162	beta-carotene	7	Launched		0
hsa-miR-29c-3p	MIMAT0000681	442514	0.0263089	hematoxylin	7	Preclinical		0
hsa-miR-29c-3p	MIMAT0000681	1794427	0.0266576	chlorogenic-acid	6	Launched	antioxidant	27	SLC37A4	neurology/psychiatry|pulmonary|allergy	headache|chest congestion|allergic rhinitis
hsa-miR-29c-3p	MIMAT0000681	13711	0.0141461	torcitabine	6	Phase 2	DNA polymerase inhibitor	17	DCK|TK2
hsa-miR-29c-3p	MIMAT0000681	68684	0.029874	clanfenur	6	Preclinical	anticancer agent	11
hsa-miR-29c-3p	MIMAT0000681	94141	0.0168259	NPC-01	6	Phase 3	steroid	11
hsa-miR-29c-3p	MIMAT0000681	6166	0.0297619	desoxycortone	6	Preclinical	mineralocorticoid receptor agonist	9	NR3C1|NR3C2
hsa-miR-29c-3p	MIMAT0000681	5281515	0.0210567	g-caryophyllene	6	Preclinical	acetylcholinesterase inhibitor	8	ACHE
hsa-miR-29c-3p	MIMAT0000681	5054	0.0148652	resorcinol	6	Launched	phosphodiesterase inhibitor	8	CA12|CA14|CA2|PTGS1	dermatology	acne vulgaris (AV)|eczema|psoriasis|seborrheic dermatitis
hsa-miR-29c-3p	MIMAT0000681	9062	0.0788652	2-deoxyglucose	6	Phase 2	glycolysis inhibitor	6	SLC2A1|SLC2A2|SLC2A3|SLC2A4
hsa-miR-29c-3p	MIMAT0000681	4055	0.0212092	menadione	6	Launched	mitochondrial DNA polymerase inhibitor|phosphatase inhibitor	6	AOX1|BGLAP|F10|F2|F7|F9|GGCX|NQO1|NQO2|PROC|PROS1|PROZ|VKORC1|VKORC1L1	gastroenterology|neurology/psychiatry|dermatology|rheumatology	ulcerative colitis|diarrhea|headache|varicose veins|rheumatoid arthritis
hsa-miR-29c-3p	MIMAT0000681	4091	0.0195044	metformin	6	Launched	insulin sensitizer	6	ACACB|PRKAB1	endocrinology	diabetes mellitus
hsa-miR-29c-3p	MIMAT0000681	43157	0.0197428	eniluracil	6	Phase 3	dihydropyrimidine dehydrogenase inhibitor	6	AOX1|DPYD|XDH
hsa-miR-29c-3p	MIMAT0000681	446098	0.0612883	2-fluorofucose	6	Phase 1		0
hsa-miR-29c-3p	MIMAT0000681	7057924	0.0213069	2-ethyl-1,3-hexanediol	6	Preclinical		0
hsa-miR-29c-3p	MIMAT0000681	11332752	0.0209533	shikimic-acid	6	Preclinical		0
hsa-miR-29c-3p	MIMAT0000681	159055	0.0201736	camphor-(+)	6	Phase 2		0
hsa-miR-29c-3p	MIMAT0000681	443980	0.0220758	flumethasone-pivalate	5	Launched	glucocorticoid receptor agonist	65	NR3C1|SERPINA6	allergy	allergic rhinitis
hsa-miR-29c-3p	MIMAT0000681	41097932	0.0283477	equilin	5	Preclinical	estrogen receptor agonist	33	HSD17B1
hsa-miR-29c-3p	MIMAT0000681	73581	0.016033	bilobalide	5	Preclinical	GABA receptor modulator	11	GLRA1|GLRA2|GLRB|HTR3A|HTR3B
hsa-miR-29c-3p	MIMAT0000681	56208	0.0316277	sarafloxacin	5	Launched	bacterial DNA gyrase inhibitor	10		infectious disease	gram-negative bacterial infections|gram-positive bacterial infections
hsa-miR-29c-3p	MIMAT0000681	6481236	0.0172588	PSI-6130	5	Phase 1	RNA polymerase inhibitor	10
hsa-miR-29c-3p	MIMAT0000681	124605168	0.0170158	bruceantin	5	Phase 2	protein synthesis inhibitor	7
hsa-miR-29c-3p	MIMAT0000681	11213350	0.0275969	S-111	5	Phase 2	PARP inhibitor	5	PARP1
hsa-miR-29c-3p	MIMAT0000681	445913	0.0937133	2-fluoro-2-deoxy-D-galactose	5	Phase 1		0	LCT
hsa-miR-29c-3p	MIMAT0000681	12518181	0.0573054	2,3-cis/exo-pinanediol	5	Phase 1		0
hsa-miR-29c-3p	MIMAT0000681	10219606	0.0468584	pinanediol	5	Preclinical		0
hsa-miR-29c-3p	MIMAT0000681	5146	0.0255349	salicyl-alcohol	5	Preclinical		0
hsa-miR-29c-3p	MIMAT0000681	5997	0.015874	cholesterol	5	Preclinical		0	RORA
hsa-miR-29c-3p	MIMAT0000681	5311067	0.0170104	desoximetasone	4	Launched	glucocorticoid receptor agonist	65	NR3C1|PLA2G1B	dermatology	corticosteroid-responsive dermatoses
hsa-miR-29c-3p	MIMAT0000681	5742590	0.0184624	daucosterol	4	Phase 2	apoptosis stimulant	21
hsa-miR-29c-3p	MIMAT0000681	3610	0.0240544	hexylresorcinol	4	Launched	local anesthetic	7	TYR	infectious disease	skin infections|first-aid antiseptic
hsa-miR-29c-3p	MIMAT0000681	5329106	0.0288984	toceranib	4	Launched	protein tyrosine kinase inhibitor	7	FLT1|FLT3|KDR|PDGFRA|PDGFRB	oncology	cutaneous mast cell tumors
hsa-miR-29c-3p	MIMAT0000681	9854073	0.0259454	cabazitaxel	4	Launched	microtubule inhibitor	6	TUBA1A|TUBA1B|TUBA1C|TUBA3C|TUBA3D|TUBA3E|TUBA4A|TUBB|TUBB1|TUBB2A|TUBB2B|TUBB3|TUBB4A|TUBB4B|TUBB6|TUBB8	oncology	prostate cancer
hsa-miR-29c-3p	MIMAT0000681	230748	0.0410557	INCA-6	4	Preclinical	calcineurin inhibitor	5	NFATC1
hsa-miR-29c-3p	MIMAT0000681	4760	0.017665	phenindione	4	Launched	vitamin K antagonist	5	VKORC1	hematology	deep vein thrombosis (DVT)
hsa-miR-29c-3p	MIMAT0000681	5311035	0.0153033	butaprost	4	Preclinical	prostaglandin receptor agonist	4
hsa-miR-29c-3p	MIMAT0000681	31402	0.0145659	eltanolone	4	Phase 3	GABA receptor positive allosteric modulator	4	GABRA1|GABRA2|GABRA3|GABRA4|GABRA5|GABRA6|GABRB2|GABRG2
hsa-miR-29c-3p	MIMAT0000681	444679	0.015904	ergosterol	4	Preclinical	vitamin D precursor	4
hsa-miR-29c-3p	MIMAT0000681	439710	0.0346426	L-(+)-rhamnose-monohydrate	4	Preclinical		0
hsa-miR-29c-3p	MIMAT0000681	6474640	0.0268349	1,5-dicaffeoylquinic-acid	4	Phase 1		0
hsa-miR-29c-3p	MIMAT0000681	5284587	0.0292488	meprednisone	4	Launched		0	NR3C1
hsa-miR-29c-3p	MIMAT0000681	5280794	0.014883	stigmasterol	4	Preclinical		0
hsa-miR-29c-3p	MIMAT0000681	2374	0.0163552	BHQ	3	Preclinical	ATPase inhibitor	14	ATP2A1
hsa-miR-29c-3p	MIMAT0000681	492405	0.0143073	favipiravir	3	Phase 3	RNA polymerase inhibitor	10
hsa-miR-29c-3p	MIMAT0000681	5753	0.019655	corticosterone	3	Preclinical	mineralocorticoid receptor agonist	9	HSD11B1|NCOA1|NR3C2
hsa-miR-29c-3p	MIMAT0000681	148124	0.021544	docetaxel	3	Launched	tubulin polymerization inhibitor	6	BCL2|MAP2|MAP4|MAPT|NR1I2|TUBA1A|TUBA1B|TUBA1C|TUBA3C|TUBA3D|TUBA3E|TUBA4A|TUBB|TUBB1|TUBB2A|TUBB2B|TUBB3|TUBB4A|TUBB4B|TUBB6|TUBB8	oncology	breast cancer|non-small cell lung cancer (NSCLC)|prostate cancer|gastric adenocarcinoma|head and neck squamous cell carcinoma (HNSCC)
hsa-miR-29c-3p	MIMAT0000681	98054312	0.0143925	ajmaline	3	Launched	sodium channel blocker	5		cardiology	Wolff-Parkinson-White Syndrome (WPW)
hsa-miR-29c-3p	MIMAT0000681	69605	0.015622	5-fluoropyrimidine	3	Phase 3	kinase inhibitor	3
hsa-miR-29c-3p	MIMAT0000681	445154	0.0284963	resveratrol	3	Launched	cytochrome P450 inhibitor|SIRT activator	3	CSNK2A1|NQO2|PTGS1|PTGS2
hsa-miR-29c-3p	MIMAT0000681	6436	0.0159994	triamcinolone-acetonide	3	Launched	glucocorticoid receptor agonist|immunosuppressant	3	NR3C1|SERPINA6	dermatology	corticosteroid-responsive dermatoses
hsa-miR-29c-3p	MIMAT0000681	6916934	0.0142642	aurothioglucose	3	Launched	PKC inhibitor	3	PRKCI	rheumatology	rheumatoid arthritis
hsa-miR-29c-3p	MIMAT0000681	25271978	0.0141124	methsuximide	3	Launched	T-type calcium channel blocker	3	CACNA1G|CACNA1H|CACNA1I	neurology/psychiatry	seizures
hsa-miR-29c-3p	MIMAT0000681	5905	0.0174575	idoxuridine	3	Launched	DNA directed DNA polymerase inhibitor|DNA synthesis inhibitor	3		infectious disease	virus herpes simplex (HSV)
hsa-miR-29c-3p	MIMAT0000681	6857365	0.017377	sodium-ascorbate	3	Launched		0
hsa-miR-29c-3p	MIMAT0000681	10477896	0.0215379	perfluorohexyloctane	3	Launched		0
hsa-miR-29c-3p	MIMAT0000681	6215	0.0196793	fluocinolone-acetonide	2	Launched	glucocorticoid receptor agonist	65	NR3C1|SERPINA6	dermatology	seborrheic dermatitis
hsa-miR-29c-3p	MIMAT0000681	10187	0.0270393	dithranol	2	Launched	DNA synthesis inhibitor	10		dermatology	psoriasis
hsa-miR-29c-3p	MIMAT0000681	5991	0.0171116	ethinyl-estradiol	2	Launched	estrogen receptor agonist|estrogenic hormone	9	ESR1|ESR2|NR1I2	endocrinology	contraceptive
hsa-miR-29c-3p	MIMAT0000681	21626088	0.0161463	cis-exo-camphanediol-2,3	2	Phase 1	nitric oxide stimulant	3	NOS3
hsa-miR-29c-3p	MIMAT0000681	2052	0.0179685	tyrphostin-AG-18	2	Preclinical	EGFR inhibitor|tyrosine kinase inhibitor	3	EGFR
hsa-miR-29c-3p	MIMAT0000681	656615	0.0154563	potassium-canrenoate	2	Launched	mineralocorticoid receptor antagonist	3	NR3C2	cardiology	edema
hsa-miR-29c-3p	MIMAT0000681	10341154	0.0148549	VX-702	2	Phase 2	p38 MAPK inhibitor	2	IL1B|IL6|MAPK11|MAPK12|MAPK14|TNF
hsa-miR-29c-3p	MIMAT0000681	5281718	0.0435023	polydatin	2	Phase 2	ICAM1 expression inhibitor	2	ICAM1
hsa-miR-29c-3p	MIMAT0000681	14187	0.0197478	ST-1859	2	Phase 1	antiamyloidogenic agent	2
hsa-miR-29c-3p	MIMAT0000681	6035	0.0162391	broxuridine	2	Phase 2	antimetabolite	2
hsa-miR-29c-3p	MIMAT0000681	457964	0.0152688	aphidicolin	2	Phase 1	RNA synthesis inhibitor	2
hsa-miR-29c-3p	MIMAT0000681	1549082	0.0427362	gluconolactone	2	Launched		0	LCT
hsa-miR-29c-3p	MIMAT0000681	222284	0.0220929	sitosterol	2	Preclinical		0
hsa-miR-29c-3p	MIMAT0000681	15209	0.0197458	fludroxycortide	1	Launched	glucocorticoid receptor agonist	65	NR3C1|SERPINA6	infectious disease|dermatology	skin infections|psoriasis
hsa-miR-29c-3p	MIMAT0000681	51895260	0.0158623	diflorasone-diacetate	1	Launched	glucocorticoid receptor agonist	65	NR3C1	dermatology	corticosteroid-responsive dermatoses
hsa-miR-29c-3p	MIMAT0000681	9917980	0.0145347	secoisolariciresinol-diglucoside	1	Phase 2	antioxidant	27
hsa-miR-29c-3p	MIMAT0000681	4996	0.0204041	pyroxamide	1	Phase 1	HDAC inhibitor	22	HDAC1
hsa-miR-29c-3p	MIMAT0000681	6919051	0.0173759	norfloxacin	1	Launched	bacterial DNA gyrase inhibitor	10	TOP2A	infectious disease|urology	urinary tract infections|gonorrhea|prostatitis
hsa-miR-29c-3p	MIMAT0000681	135564655	0.0224751	guadecitabine	1	Phase 3	DNA methyltransferase inhibitor	7
hsa-miR-29c-3p	MIMAT0000681	3305	0.0260906	etidronic-acid	1	Launched	bone resorption inhibitor	6	ATP6V1A|PTPRS	endocrinology|orthopedics	Paget's disease|heterotopic ossification
hsa-miR-29c-3p	MIMAT0000681	4909	0.0166597	primidone	1	Launched	GABA receptor antagonist	5	CHRNA4|CHRNA7|GABRA1|GABRA2|GABRA3|GABRA4|GABRA5|GABRA6|GABRB1|GABRB2|GABRB3|GABRD|GABRE|GABRG1|GABRG2|GABRG3|GABRP|GABRQ|GRIA2|GRIK2|SCN10A|SCN11A|SCN1A|SCN2A|SCN3A|SCN4A|SCN5A|SCN7A|SCN8A|SCN9A	neurology/psychiatry	seizures
hsa-miR-29c-3p	MIMAT0000681	440936	0.042144	arbutin	1	Phase 2/Phase 3	melanin inhibitor	3	TYR
hsa-miR-29c-3p	MIMAT0000681	6780	0.0222079	anthraquinone	1	Preclinical	CDC inhibitor	1	CDC25B
hsa-miR-29c-3p	MIMAT0000681	5281792	0.0193929	rosmarinic-acid	1	Launched	GABA transaminase inhibitor	1	MCL1|TYR
hsa-miR-29c-3p	MIMAT0000681	72894	0.0189892	2-aminobenzenesulfonamide	1	Preclinical	carbonic anhydrase inhibitor	1	CA12|CA14|CA2|CA6|CA9
hsa-miR-29c-3p	MIMAT0000681	5281793	0.0164875	salvianolic-acid-A	1	Phase 1	matrix metalloprotease inhibitor	1
hsa-miR-29c-3p	MIMAT0000681	4283	0.016447	1,12-Besm	1	Phase 2	polyamine biosynthesis inhibitor	1
hsa-miR-29c-3p	MIMAT0000681	521106	0.0162305	IPA-3	1	Preclinical	p21 activated kinase inhibitor	1	PAK1
hsa-miR-29c-3p	MIMAT0000681	9913339	0.0160313	BMS-566419	1	Preclinical	inosine monophosphate dehydrogenase inhibitor	1	IMPDH1|IMPDH2
hsa-miR-29c-3p	MIMAT0000681	4912	0.01581	probucol	1	Launched	atherogenesis inhibitor	1	ABCA1|ABCB11|CES1	cardiology	coronary artery disease (CAD)
hsa-miR-29c-3p	MIMAT0000681	52913524	0.0141468	licogliflozin	1	Preclinical	sodium/glucose cotransporter inhibitor	1
hsa-miR-29c-3p	MIMAT0000681	8663	0.0221115	beta-naphthol	1	Preclinical		0
hsa-miR-29c-3p	MIMAT0000681	2365	0.020533	propiolactone	1	Launched		0		infectious disease	antiseptic
hsa-miR-29c-3p	MIMAT0000681	132469060	0.0154448	casanthranol-variant	1	Launched		0		gastroenterology	constipation
hsa-miR-29c-3p	MIMAT0000681	115067	0.0145733	gastrodin	1	Phase 2		0
