# Supplementary material for: To boldly go where no microRNAs have gone before: Spaceflight impact on risk for small-for-gestational-age infants
Source: Research Square preprint supplement (doi:10.21203/rs.3.rs-4003363/v1), 2024-04-22
Supplement: Supplementary file 2 [file 53ea590862dbbaa9f06ca971.xlsx]

## Sheet: All 3 common targets 
	Total number gene targets for top 10 common genes	41	40	38	22	37	27	42	38	35	42	40	41	32
	Total number gene targets	1888	1967	1346	707	1172	798	1211	1663	1697	1815	1270	1343	962
Genes	Common	hsa-let-7b-5p	hsa-miR-106b-5p	hsa-miR-130a-3p	hsa-miR-146b-5p	hsa-miR-148a-3p	hsa-miR-192-5p	hsa-miR-22-3p	hsa-miR-23a-3p	hsa-miR-24-3p	hsa-miR-27b-3p	hsa-miR-29b-3p	hsa-miR-29c-3p	hsa-miR-378a-3p
NSD1	13	1	1	1	1	1	1	1	1	1	1	1	1	1
NTRK2	12	1	0	1	1	1	1	1	1	1	1	1	1	1
POU2F1	12	1	1	1	1	1	1	1	1	1	1	1	1	0
SMAD2	12	1	1	1	1	1	1	0	1	1	1	1	1	1
ANKRD52	11	1	1	1	0	1	0	1	1	1	1	1	1	1
C16orf72	11	1	1	1	1	1	0	1	1	0	1	1	1	1
CAND1	11	1	1	1	0	1	1	1	0	1	1	1	1	1
CBX5	11	1	1	1	0	1	0	1	1	1	1	1	1	1
DICER1	11	1	1	1	0	1	1	1	1	0	1	1	1	1
ERC1	11	1	1	1	1	1	0	1	0	1	1	1	1	1
HIPK1	11	1	1	0	1	1	0	1	1	1	1	1	1	1
NFAT5	11	1	1	0	1	1	1	1	0	1	1	1	1	1
NUCKS1	11	1	1	1	1	1	1	1	1	0	1	1	1	0
NUFIP2	11	1	1	1	0	1	0	1	1	1	1	1	1	1
QKI	11	1	1	1	1	1	0	1	1	1	1	1	1	0
SH3PXD2A	11	1	1	1	0	1	0	1	1	1	1	1	1	1
UHMK1	11	1	1	1	0	1	0	1	1	1	1	1	1	1
ZKSCAN1	11	1	1	1	0	1	1	1	1	1	1	1	1	0
ZNF652	11	1	1	1	1	0	1	0	1	1	1	1	1	1
ZNF704	11	1	1	0	1	1	1	1	1	1	0	1	1	1
AGO1	10	1	1	1	1	1	0	1	0	1	0	1	1	1
AKAP11	10	0	1	1	0	1	1	1	1	0	1	1	1	1
ARPP19	10	1	1	0	1	1	0	1	1	1	1	1	1	0
ASPH	10	1	0	1	1	1	1	0	0	1	1	1	1	1
ATXN1	10	1	1	1	0	1	0	1	1	1	1	1	1	0
BMPR2	10	1	1	1	1	1	1	1	1	1	1	0	0	0
DCP2	10	0	1	1	0	1	0	1	1	1	1	1	1	1
DDX6	10	1	0	1	0	1	1	1	0	1	1	1	1	1
DNM3	10	1	1	1	0	1	0	1	1	1	1	1	1	0
IL6ST	10	1	1	1	1	1	1	1	1	0	1	0	0	1
INSIG1	10	0	1	1	0	1	1	1	1	1	1	1	1	0
LRRC58	10	1	1	0	0	0	1	1	1	1	1	1	1	1
MDM2	10	1	1	0	1	0	1	1	1	0	1	1	1	1
MKLN1	10	1	1	0	1	0	0	1	1	1	1	1	1	1
PURB	10	1	1	1	0	1	1	1	1	1	1	0	0	1
SOGA1	10	1	1	1	1	0	0	1	1	1	1	1	1	0
SSR1	10	1	1	1	0	1	0	1	1	1	1	0	1	1
TNPO1	10	1	1	1	1	1	1	1	1	1	1	0	0	0
TNRC6B	10	1	1	1	0	1	1	1	1	0	1	1	1	0
TUB	10	1	0	1	0	0	1	1	1	1	1	1	1	1
UBE2K	10	1	0	1	0	1	1	1	1	1	1	1	1	0
VANGL1	10	0	1	1	1	1	1	1	0	0	1	1	1	1
WDR33	10	1	1	1	0	0	0	1	1	1	1	1	1	1
WNK1	10	1	1	1	0	0	1	1	1	0	1	1	1	1
YY1	10	1	1	1	0	1	1	1	1	0	0	1	1	1
ABHD2	9	1	1	1	1	0	0	1	1	1	1	0	0	1
AK4	9	1	1	0	1	1	0	0	1	1	1	1	1	0
ATP13A3	9	1	1	1	1	0	0	0	1	1	1	1	1	0
CACUL1	9	1	1	0	0	1	0	1	1	1	1	1	1	0
CCNT2	9	1	1	0	1	0	1	1	1	0	1	1	1	0
CDK6	9	1	0	1	0	1	0	1	1	0	1	1	1	1
CDKN1A	9	1	1	1	1	1	0	1	0	1	0	1	1	0
CLOCK	9	1	1	1	0	1	0	0	1	0	1	1	1	1
CREB3L2	9	1	1	1	1	0	1	1	0	1	1	0	0	1
DCBLD2	9	1	1	1	0	1	1	1	1	1	0	0	0	1
ENAH	9	1	1	1	0	1	0	1	0	0	1	1	1	1
ERLIN2	9	1	1	0	0	0	1	1	1	1	1	1	1	0
ESR1	9	0	1	1	1	1	1	1	1	0	0	1	0	1
FMNL3	9	1	1	1	1	0	0	1	1	0	0	1	1	1
GFOD1	9	1	0	0	0	0	1	1	1	1	1	1	1	1
GTF3C4	9	1	1	0	0	1	1	1	1	0	1	1	1	0
HELZ	9	1	1	0	0	1	1	0	1	1	1	1	1	0
HIPK2	9	1	1	1	0	1	1	1	1	0	1	0	0	1
IKZF2	9	1	1	1	1	0	1	1	1	1	1	0	0	0
INO80D	9	1	0	1	1	1	1	0	1	0	1	1	1	0
ITSN1	9	1	1	0	1	0	1	1	1	1	1	0	0	1
KLF12	9	1	1	1	1	1	0	0	1	0	1	1	1	0
LARP4B	9	0	1	1	1	1	0	1	1	0	1	1	1	0
LPGAT1	9	1	1	1	0	0	0	1	1	0	1	1	1	1
LPP	9	1	1	1	1	1	0	1	1	0	1	0	0	1
LUC7L3	9	1	0	0	1	0	1	1	1	0	1	1	1	1
MACC1	9	1	1	1	1	0	1	0	0	1	1	1	1	0
MAP1B	9	1	1	1	1	1	0	1	1	1	1	0	0	0
MAPK1	9	1	1	1	0	1	0	1	1	1	1	0	0	1
MTMR9	9	1	1	1	0	1	1	0	1	1	0	1	1	0
NOTCH2	9	1	1	0	0	0	1	1	1	1	1	1	1	0
PLAG1	9	1	1	0	0	0	1	0	1	1	1	1	1	1
PPARA	9	1	1	1	0	1	0	1	1	1	1	0	0	1
PURA	9	1	1	0	0	0	1	1	1	1	1	1	1	0
PXDN	9	1	1	1	0	0	1	1	1	0	1	1	1	0
RLIM	9	1	1	1	0	0	1	0	1	1	1	1	1	0
SESTD1	9	1	0	1	1	1	1	0	0	0	1	1	1	1
SLC7A11	9	1	1	1	0	1	1	0	1	1	1	0	0	1
SMC1A	9	1	1	1	1	0	0	0	1	1	1	1	1	0
SNX27	9	1	1	1	0	1	1	1	1	1	1	0	0	0
SPTY2D1	9	1	1	1	0	1	0	1	1	0	1	1	1	0
STX16	9	1	0	1	0	1	1	0	1	1	1	1	1	0
TAOK1	9	1	1	1	0	0	0	0	1	1	1	1	1	1
TET2	9	1	1	1	1	1	0	1	1	0	0	1	1	0
TP53INP1	9	1	1	1	0	1	0	1	0	1	1	1	1	0
TSPAN3	9	1	1	1	1	0	0	1	0	1	0	1	1	1
ZMAT3	9	1	1	1	0	1	1	0	1	1	1	0	0	1
ZNF24	9	1	1	1	1	1	0	1	1	0	0	1	0	1
ABL2	8	1	1	0	1	0	0	1	1	1	1	0	0	1
ACACA	8	1	0	1	0	1	0	0	0	1	1	1	1	1
ADAM12	8	0	0	1	0	0	0	1	1	1	1	1	1	1
ADARB1	8	1	1	1	1	1	0	1	0	1	0	0	0	1
AFF1	8	0	1	1	1	1	0	0	1	1	1	0	0	1
AFF4	8	1	1	0	0	0	0	1	0	1	1	1	1	1
AGO3	8	1	1	1	0	1	0	0	1	1	0	1	1	0
AMMECR1L	8	1	1	0	0	0	0	1	1	0	1	1	1	1
ANGEL2	8	0	1	1	0	1	0	1	1	0	1	1	1	0
ANKRD13C	8	1	1	1	0	0	0	1	1	0	1	1	1	0
BCL2L11	8	0	1	1	0	1	1	0	0	1	1	1	0	1
BCL2L2	8	1	1	1	0	1	0	1	0	1	0	1	1	0
BNIP2	8	0	1	0	0	1	1	0	1	0	1	1	1	1
BRWD1	8	1	1	1	1	1	1	0	1	0	1	0	0	0
BRWD3	8	1	1	1	0	0	0	1	0	0	1	1	1	1
BTBD7	8	1	1	1	0	0	0	0	1	0	1	1	1	1
BTG2	8	1	1	0	1	1	0	0	0	1	1	1	1	0
C1orf21	8	1	1	0	0	0	0	0	1	1	1	1	1	1
CALU	8	1	1	0	0	0	0	0	1	1	1	1	1	1
CAMSAP2	8	0	1	1	1	1	1	0	1	0	0	1	1	0
CBX6	8	0	0	1	1	1	1	1	0	1	0	1	1	0
CELF2	8	1	1	0	0	0	0	0	1	1	1	1	1	1
CFL2	8	1	1	1	0	1	0	0	1	0	0	1	1	1
CLCN5	8	1	1	1	0	0	0	1	0	1	1	1	1	0
CLTC	8	0	1	1	0	1	1	0	1	1	1	1	0	0
CNOT6	8	1	1	1	1	1	0	0	1	1	0	0	1	0
CUL3	8	1	1	1	0	1	1	1	1	0	0	0	0	1
DDI2	8	1	1	1	0	0	0	0	1	0	1	1	1	1
DDX3X	8	0	0	0	0	1	1	1	1	0	1	1	1	1
DSC2	8	1	0	1	0	1	0	0	1	1	1	1	1	0
DTNA	8	1	1	0	1	1	0	1	1	1	1	0	0	0
DYNLL2	8	0	0	1	1	1	1	1	1	0	1	0	0	1
DYRK2	8	1	1	0	0	1	0	1	1	1	0	0	1	1
E2F7	8	1	0	1	0	1	0	0	1	0	1	1	1	1
ELK4	8	1	1	1	1	0	1	0	0	1	0	1	1	0
EMP1	8	0	0	1	0	1	1	1	0	1	1	1	1	0
ENTPD1	8	1	0	0	1	1	0	1	0	1	0	1	1	1
FBN1	8	0	1	1	0	1	1	0	0	1	1	1	1	0
FEM1B	8	0	1	1	0	0	0	1	1	0	1	1	1	1
FGF2	8	0	1	1	0	1	1	1	1	1	0	0	0	1
FRS2	8	1	1	0	0	1	0	1	0	0	1	1	1	1
FZD4	8	1	0	0	0	0	1	1	1	1	1	0	1	1
G3BP1	8	1	1	1	1	0	0	0	0	1	0	1	1	1
GMFB	8	0	1	1	1	1	0	0	0	1	1	1	1	0
GNG12	8	1	1	0	0	1	0	0	0	1	1	1	1	1
HDAC4	8	1	1	0	0	0	0	1	1	0	1	1	1	1
HIF1AN	8	1	1	1	0	1	1	0	1	1	1	0	0	0
HMGA2	8	1	1	1	0	1	0	1	1	0	0	1	1	0
HMGCS1	8	1	0	0	0	0	1	0	1	1	1	1	1	1
IGF1R	8	1	1	0	1	1	1	1	0	0	1	0	0	1
IGFBP5	8	0	1	1	1	1	0	1	0	1	1	0	0	1
IKZF4	8	0	1	1	1	1	0	1	1	1	0	0	1	0
IL17RD	8	1	1	0	1	0	0	1	0	1	0	1	1	1
IPO9	8	1	1	0	0	0	0	1	1	1	0	1	1	1
JMY	8	1	1	1	0	1	0	1	0	0	1	1	1	0
KBTBD8	8	1	1	1	0	0	0	0	1	1	1	1	1	0
KLF7	8	1	0	1	1	0	0	1	1	0	0	1	1	1
KLHL15	8	1	1	1	1	0	1	0	1	1	0	0	0	1
KPNA1	8	1	1	1	0	1	0	1	1	0	0	1	1	0
KPNA4	8	1	1	0	0	1	1	0	1	1	0	1	1	0
MAPK8	8	1	1	1	0	0	0	1	0	1	1	1	1	0
MAVS	8	1	1	1	0	0	0	1	0	1	0	1	1	1
MEF2A	8	0	1	1	0	1	0	0	1	1	0	1	1	1
MMP16	8	1	0	1	1	0	0	1	0	1	1	1	1	0
MOB1B	8	1	1	0	1	1	0	1	1	1	0	0	0	1
MTMR4	8	0	0	1	0	1	1	1	1	0	1	1	1	0
MTPN	8	1	1	1	1	0	0	1	0	0	1	1	1	0
NAP1L1	8	1	1	1	0	1	0	1	1	1	1	0	0	0
NAV2	8	0	1	1	0	0	0	1	0	1	1	1	1	1
NFIB	8	0	1	1	0	0	1	0	1	1	1	1	1	0
NIPA1	8	1	1	1	0	1	1	1	1	1	0	0	0	0
NRAS	8	1	1	1	0	1	0	1	0	0	1	1	1	0
ONECUT2	8	1	1	0	1	0	1	0	1	1	1	0	1	0
PAFAH1B1	8	1	1	1	0	1	1	1	1	0	0	0	0	1
PDGFRA	8	0	1	1	1	0	0	0	0	1	1	1	1	1
PHLPP2	8	1	1	1	0	0	0	1	0	1	1	1	1	0
PIK3R3	8	0	0	1	0	1	0	0	1	1	1	1	1	1
PIKFYVE	8	0	0	1	0	0	1	0	1	1	1	1	1	1
PLAGL2	8	1	1	1	0	0	1	1	0	1	1	0	0	1
PPARGC1B	8	1	0	1	0	1	0	1	1	1	1	0	0	1
PPP1R10	8	0	1	1	0	1	0	1	0	1	1	1	1	0
PPP1R12B	8	1	1	1	1	1	0	1	0	1	0	0	0	1
PPP1R15B	8	1	1	1	0	1	0	1	0	0	0	1	1	1
PRKAR2A	8	1	1	1	1	1	0	1	0	0	1	0	0	1
PRLR	8	1	0	0	1	1	1	1	1	0	1	0	0	1
PRR14L	8	0	1	1	0	0	0	0	1	1	1	1	1	1
PTEN	8	0	1	1	0	1	0	1	1	0	0	1	1	1
RAB30	8	1	1	1	0	0	1	0	1	0	1	1	1	0
RAB3B	8	1	1	0	1	0	1	0	1	1	1	0	0	1
RAB3C	8	0	0	0	0	1	0	1	1	1	1	1	1	1
RASSF8	8	0	0	0	0	1	1	1	1	0	1	1	1	1
RC3H1	8	0	1	1	0	1	1	0	1	1	1	1	0	0
REPS2	8	1	1	1	0	0	0	0	1	1	1	1	1	0
RIT1	8	0	1	0	0	1	0	0	1	1	1	1	1	1
RNF38	8	1	1	1	0	1	0	1	1	0	1	0	0	1
SBNO1	8	1	1	1	0	1	0	0	1	1	0	1	1	0
SERBP1	8	0	1	1	1	0	0	1	0	0	1	1	1	1
SGMS2	8	1	0	1	0	1	1	0	0	1	1	1	1	0
SKI	8	1	1	0	0	1	0	1	0	1	0	1	1	1
SLC1A2	8	1	1	0	1	0	0	0	1	1	1	1	1	0
SLC30A4	8	1	1	1	0	1	0	1	1	1	0	0	0	1
SLC31A1	8	1	1	1	0	0	0	1	1	1	0	1	1	0
SLC39A10	8	0	1	1	0	1	0	1	1	0	1	1	1	0
SLC7A1	8	0	1	1	0	0	1	1	1	1	1	0	0	1
SLC7A2	8	0	0	0	0	1	1	1	0	1	1	1	1	1
SPIN4	8	0	1	1	0	0	1	0	1	1	1	1	1	0
SSH2	8	1	1	0	0	1	0	0	1	1	1	0	1	1
STK4	8	1	0	1	1	1	1	0	1	1	1	0	0	0
STOX2	8	1	1	1	0	1	1	1	0	0	1	0	0	1
STRN	8	1	1	0	0	0	0	1	1	1	1	1	1	0
STX3	8	1	0	1	0	1	0	1	1	1	0	1	1	0
TANC2	8	0	1	1	1	1	0	1	1	1	0	0	0	1
THRB	8	1	0	1	1	0	0	1	1	1	1	0	0	1
TIMP2	8	0	1	1	0	0	0	1	1	1	0	1	1	1
TMEM178B	8	1	0	0	0	1	0	1	1	1	0	1	1	1
TNRC6A	8	1	1	1	1	1	0	1	1	0	1	0	0	0
TRIM2	8	1	1	1	1	1	1	0	1	0	1	0	0	0
TRPS1	8	0	1	1	1	1	0	0	1	1	0	1	1	0
UBN2	8	0	1	1	1	1	0	0	1	1	1	0	0	1
USP37	8	1	1	0	1	0	0	1	1	1	0	1	1	0
VGLL3	8	1	1	1	1	0	1	0	1	1	1	0	0	0
VPS13C	8	1	1	0	0	0	1	0	1	1	0	1	1	1
VPS53	8	1	1	0	0	0	1	1	1	1	1	0	0	1
WDFY3	8	1	1	1	0	0	0	1	0	1	0	1	1	1
YPEL2	8	1	1	0	1	0	1	0	0	0	1	1	1	1
ZBTB10	8	1	1	0	0	0	1	0	1	0	1	1	1	1
ZBTB34	8	0	0	0	1	0	1	1	1	0	1	1	1	1
ZFHX3	8	0	1	1	0	0	1	0	1	0	1	1	1	1
ACVR2A	7	1	0	1	0	0	1	0	1	0	1	1	1	0
ADAMTS6	7	1	0	0	0	0	0	1	1	1	1	1	1	0
AEN	7	1	1	0	1	0	0	1	1	1	0	0	0	1
AKT3	7	1	1	0	0	0	0	1	0	1	1	1	1	0
AP1G1	7	0	1	1	0	1	0	1	0	0	1	1	1	0
APPBP2	7	1	1	0	0	1	0	0	1	1	1	0	0	1
AR	7	1	0	1	1	1	0	0	0	0	1	1	1	0
ARHGAP19	7	1	0	0	0	1	1	1	0	1	1	0	0	1
ARHGEF12	7	1	0	1	0	1	1	1	0	1	0	0	0	1
ARID5B	7	1	0	1	0	1	0	1	0	1	1	0	0	1
ARIH1	7	1	1	0	0	0	1	1	1	1	0	0	0	1
ASAP2	7	1	1	1	1	0	0	1	0	0	0	1	1	0
ASXL2	7	1	1	1	0	0	1	0	1	0	0	1	1	0
ATG16L1	7	1	1	1	0	1	0	0	1	0	0	1	1	0
ATXN1L	7	1	1	1	1	1	1	0	0	0	0	0	0	1
ATXN7L3B	7	1	1	0	0	0	0	0	1	1	0	1	1	1
B3GNT5	7	1	0	0	1	0	1	0	1	1	0	1	1	0
B4GALT5	7	0	1	1	0	1	0	1	1	0	1	1	0	0
BICD2	7	0	1	1	1	0	0	1	1	1	1	0	0	0
BMF	7	1	0	0	1	0	0	1	0	1	1	1	1	0
C5orf24	7	1	1	0	0	1	0	1	0	0	0	1	1	1
CASP7	7	0	1	1	1	0	1	0	1	0	0	1	1	0
CCND1	7	1	1	0	0	0	0	0	1	1	1	1	0	1
CCSAP	7	0	1	0	0	0	1	1	1	0	1	1	1	0
CD274	7	1	1	1	0	1	0	0	1	0	0	0	1	1
CDC42BPA	7	1	0	0	0	0	0	1	1	1	0	1	1	1
CDS2	7	1	0	0	1	0	0	0	1	1	1	1	0	1
CDV3	7	1	0	1	0	0	0	0	1	1	1	1	1	0
CIT	7	0	1	1	0	1	1	1	0	1	0	1	0	0
CNOT6L	7	1	1	1	0	0	0	1	1	1	1	0	0	0
COL4A1	7	1	1	0	0	1	0	1	1	0	0	1	1	0
CPD	7	1	0	0	1	1	0	0	1	1	1	0	0	1
CPEB3	7	1	1	1	0	0	0	0	0	0	1	1	1	1
CREB1	7	0	1	1	0	0	0	1	1	1	1	1	0	0
CREBRF	7	1	1	1	0	0	1	1	0	0	1	0	0	1
CSNK1G1	7	1	0	1	0	1	0	0	0	1	1	1	1	0
CYCS	7	0	1	0	0	1	1	1	0	1	0	1	1	0
DCX	7	1	0	0	0	0	0	1	0	1	1	1	1	1
DEDD	7	0	1	1	1	1	0	0	0	1	1	0	0	1
EFNB2	7	1	1	1	0	1	1	1	0	0	1	0	0	0
EGFR	7	1	0	1	1	0	0	1	1	0	1	0	0	1
EPS15	7	0	0	1	1	1	0	0	1	0	1	1	1	0
FAM126B	7	1	1	0	0	0	1	0	1	0	1	1	1	0
FAM168B	7	1	0	0	0	1	0	1	1	1	0	1	1	0
FKBP5	7	1	1	1	0	0	0	1	1	1	0	0	0	1
FOSL2	7	1	0	1	1	1	0	0	1	1	0	0	0	1
FSTL1	7	1	1	0	0	0	0	1	0	0	1	1	1	1
FZD5	7	0	1	1	0	1	0	0	1	1	0	1	1	0
GATAD2B	7	0	0	1	1	0	0	1	0	1	0	1	1	1
GNB4	7	1	1	0	0	0	0	1	1	0	1	1	1	0
GNS	7	1	1	1	0	1	0	0	0	0	1	1	0	1
GOSR1	7	1	1	1	1	0	0	0	1	0	1	0	1	0
GPCPD1	7	1	0	1	0	1	0	0	1	0	0	1	1	1
GPR161	7	1	0	1	0	1	1	0	0	1	0	1	1	0
GPR180	7	1	0	1	0	1	1	0	1	0	1	0	0	1
GRAMD1B	7	1	0	1	0	0	1	0	0	1	1	1	1	0
GRIN2A	7	0	1	1	0	1	0	1	1	0	1	0	0	1
GRSF1	7	0	1	1	1	0	0	0	1	1	1	0	0	1
HEG1	7	1	1	1	1	0	0	0	1	1	1	0	0	0
HS2ST1	7	1	1	1	0	0	0	0	1	1	1	0	0	1
IGF2BP1	7	1	1	1	1	0	0	0	0	1	1	0	0	1
JARID2	7	0	0	1	0	1	0	1	1	1	0	1	1	0
KATNAL1	7	1	1	1	0	0	1	0	0	0	1	1	1	0
KDM5A	7	0	0	0	0	1	0	0	1	1	1	1	1	1
KDM6B	7	0	1	0	1	1	0	1	0	0	1	1	1	0
KIAA1958	7	1	1	1	0	0	1	0	1	1	0	0	0	1
KIF1B	7	1	1	1	0	0	0	0	1	1	1	0	0	1
KLHDC10	7	0	1	0	1	0	0	1	0	0	1	1	1	1
KPNB1	7	0	0	1	0	1	0	0	1	1	1	1	1	0
LARP4	7	0	0	1	0	0	1	0	1	0	1	1	1	1
LASP1	7	1	1	0	0	0	0	0	1	1	1	1	1	0
LBR	7	1	0	1	1	1	0	0	1	1	1	0	0	0
LCOR	7	1	1	1	1	1	0	0	1	0	1	0	0	0
LMTK2	7	0	1	1	1	1	1	0	0	1	0	0	0	1
LONP2	7	1	1	1	0	0	0	1	0	1	1	0	0	1
LSM11	7	1	1	0	0	1	0	0	0	1	1	1	1	0
LZIC	7	1	1	1	0	0	0	1	0	0	0	1	1	1
MAFG	7	0	1	1	0	1	0	1	0	1	0	1	1	0
MAP3K9	7	1	1	1	0	1	0	0	1	1	1	0	0	0
MAPRE1	7	1	1	1	0	1	0	0	1	0	0	1	1	0
MDM4	7	1	1	1	0	1	1	0	0	1	1	0	0	0
MED12L	7	0	1	1	0	1	0	0	1	0	1	1	1	0
MED28	7	1	1	0	0	0	0	1	0	1	1	1	1	0
MGAT4A	7	1	0	1	0	1	0	0	0	1	1	1	1	0
MIDN	7	1	1	1	1	0	0	0	1	1	1	0	0	0
MIER3	7	1	1	1	0	1	0	0	0	0	1	1	1	0
MPP2	7	1	0	0	1	0	1	0	1	1	1	0	0	1
MTAP	7	1	0	1	1	0	1	0	1	1	0	0	1	0
MTF1	7	0	1	0	0	1	0	1	1	1	1	0	0	1
MTMR12	7	1	0	1	0	1	1	1	1	1	0	0	0	0
MTR	7	1	1	1	1	0	0	1	0	0	0	1	1	0
MXD1	7	1	1	1	0	1	0	1	0	0	0	1	1	0
NCOA1	7	1	1	1	0	1	0	1	1	0	1	0	0	0
NEGR1	7	1	0	0	0	0	0	1	1	1	1	1	1	0
NFATC3	7	1	0	0	0	0	1	1	1	1	0	1	1	0
NFIA	7	0	1	1	0	0	0	0	1	0	1	1	1	1
NID1	7	0	1	1	0	1	1	0	0	1	0	1	1	0
OTUD4	7	0	1	1	0	1	0	0	1	0	1	1	1	0
PAPOLA	7	1	1	0	1	0	0	1	1	1	0	0	0	1
PDIK1L	7	0	0	1	0	1	0	1	1	0	0	1	1	1
PHACTR2	7	0	1	1	0	1	0	1	0	0	0	1	1	1
PPARGC1A	7	1	0	1	1	1	0	1	1	0	1	0	0	0
PPP1CB	7	1	0	0	0	1	1	0	1	0	1	1	1	0
PPP1R12A	7	1	1	0	0	1	1	1	1	0	1	0	0	0
PSD3	7	1	1	0	0	1	0	0	1	1	1	0	0	1
PTBP3	7	1	1	0	0	0	0	0	1	1	1	1	1	0
PTGFRN	7	1	1	1	1	0	0	0	1	1	1	0	0	0
PTPN4	7	1	1	1	0	1	0	0	1	0	0	1	1	0
RAB11FIP1	7	0	1	1	0	1	0	0	0	1	1	1	1	0
RAB18	7	1	1	0	1	0	0	1	0	1	1	0	0	1
RAB31	7	1	1	0	1	1	0	0	1	1	0	0	0	1
RAB8B	7	1	1	0	1	0	1	0	1	1	1	0	0	0
RAPH1	7	0	1	0	0	0	0	1	1	0	1	1	1	1
RBM12	7	1	1	0	0	0	0	0	1	0	1	1	1	1
RC3H2	7	0	1	1	0	1	0	1	1	1	1	0	0	0
RCC2	7	0	0	0	0	1	1	1	0	1	0	1	1	1
RCOR1	7	0	1	0	0	1	0	1	1	0	0	1	1	1
RFX7	7	1	0	1	1	1	0	0	0	0	0	1	1	1
RGMB	7	0	1	0	0	0	1	1	0	1	1	1	1	0
RHOBTB3	7	1	1	0	1	1	1	1	0	1	0	0	0	0
RMND5A	7	0	1	0	0	1	0	1	1	0	1	1	1	0
RNF24	7	1	1	1	0	0	0	0	1	1	1	0	0	1
SCML2	7	1	1	1	0	1	0	0	0	1	0	1	1	0
SERTAD2	7	1	1	1	1	0	0	1	0	0	1	0	0	1
SESN2	7	1	1	1	0	1	0	1	1	0	1	0	0	0
SESN3	7	1	1	0	1	1	0	1	1	0	1	0	0	0
SF3B3	7	0	1	0	1	1	0	0	1	1	1	0	0	1
SGCB	7	0	0	1	0	1	1	0	0	1	0	1	1	1
SLC16A14	7	1	1	0	1	0	1	1	0	0	0	1	1	0
SLC2A3	7	0	1	0	1	1	0	0	0	1	0	1	1	1
SLC38A1	7	1	1	0	1	1	0	1	1	0	0	0	0	1
SLC4A7	7	1	1	0	1	1	0	0	1	0	0	1	1	0
SLK	7	1	1	0	1	0	0	0	0	0	1	1	1	1
SMAD4	7	1	1	1	0	0	0	1	1	0	1	0	0	1
SMAD5	7	1	1	1	0	1	0	0	1	1	1	0	0	0
SNN	7	1	0	1	0	1	0	0	0	1	1	1	1	0
SOWAHC	7	0	1	0	0	0	1	0	1	1	1	1	1	0
SP1	7	1	0	1	0	0	0	1	0	1	1	1	1	0
SPRY3	7	1	0	0	1	1	0	1	0	0	1	1	1	0
SPTLC2	7	1	1	0	0	0	0	0	0	1	1	1	1	1
SRGAP1	7	1	1	0	1	0	0	1	1	1	0	0	0	1
SRSF10	7	1	1	0	0	0	0	1	0	1	0	1	1	1
SSH1	7	1	1	1	0	0	0	0	1	1	1	0	0	1
STAT3	7	0	1	1	1	0	0	1	0	1	0	1	1	0
STRBP	7	1	1	0	1	0	1	1	0	1	1	0	0	0
STX6	7	0	1	1	0	1	0	1	1	1	1	0	0	0
STYX	7	1	1	0	0	0	0	1	0	0	1	1	1	1
SYNPO2	7	1	0	0	1	0	0	1	1	0	1	1	1	0
TANC1	7	0	1	1	0	1	0	0	1	0	1	1	1	0
TBL1XR1	7	1	1	1	0	1	0	0	0	1	1	0	0	1
TGFB2	7	0	0	1	0	1	0	0	1	1	0	1	1	1
TGFBR1	7	1	1	1	0	1	0	1	0	1	1	0	0	0
TMED10	7	1	0	1	0	1	1	0	1	1	1	0	0	0
TMED5	7	1	1	1	0	1	0	1	1	0	1	0	0	0
TMEM127	7	0	1	0	1	1	0	1	0	0	1	1	1	0
TMEM154	7	1	1	0	1	0	0	1	0	1	0	0	1	1
TMEM164	7	1	1	0	0	1	1	0	1	0	1	0	0	1
TMEM167A	7	1	1	0	1	0	1	1	0	0	1	0	0	1
TMEM237	7	1	0	0	1	0	0	1	0	1	1	1	1	0
TMEM33	7	1	1	0	0	0	0	0	1	1	1	1	1	0
TNFRSF10B	7	1	1	1	0	0	0	0	1	1	0	1	1	0
TNRC6C	7	0	1	1	0	1	0	0	1	1	1	0	0	1
TOR1AIP2	7	1	0	1	0	1	0	1	1	1	1	0	0	0
TRAF3	7	0	1	0	0	0	0	1	0	1	1	1	1	1
TRAM2	7	1	0	1	1	0	0	0	1	0	0	1	1	1
TRIB2	7	1	1	0	0	1	0	1	0	0	0	1	1	1
TSC1	7	1	1	1	0	1	0	0	1	1	1	0	0	0
TULP4	7	0	1	1	1	0	0	1	0	1	1	0	0	1
TXLNG	7	1	0	0	1	0	0	0	1	0	1	1	1	1
TXNIP	7	0	1	1	1	1	0	0	1	0	1	0	0	1
UBE2W	7	1	1	1	0	1	1	0	0	1	1	0	0	0
UGCG	7	1	1	1	0	1	0	1	0	1	1	0	0	0
VASH2	7	1	1	1	0	1	1	0	0	0	0	1	1	0
WIPF2	7	1	1	1	0	0	0	1	1	1	1	0	0	0
YWHAG	7	0	0	0	0	1	0	1	1	1	1	0	1	1
ZC3H12C	7	0	1	1	1	1	1	0	1	0	0	0	0	1
ZFYVE26	7	1	1	1	0	1	1	0	0	0	0	1	1	0
ZNF217	7	0	1	1	0	1	0	1	1	1	1	0	0	0
ZNF264	7	1	1	1	1	1	0	0	0	1	0	0	0	1
ZNF445	7	1	1	0	0	1	1	0	0	1	0	1	1	0
ZNF451	7	1	0	1	0	0	1	1	1	1	1	0	0	0
ZNF507	7	1	0	0	0	0	0	0	1	1	1	1	1	1
ZNF512B	7	1	1	0	1	1	0	0	0	0	0	1	1	1
ZNF609	7	1	0	1	0	0	1	1	0	1	1	0	0	1
ZNF614	7	0	1	1	0	1	0	0	0	1	1	1	1	0
ABI2	6	0	1	0	0	0	0	0	1	0	1	1	1	1
ABLIM1	6	0	0	1	0	1	1	1	1	1	0	0	0	0
ACVR2B	6	1	0	0	0	0	1	1	0	0	0	1	1	1
ADAM19	6	0	0	0	1	0	0	0	1	1	1	1	1	0
ADAMTS5	6	1	1	0	0	1	0	0	1	1	1	0	0	0
ADAR	6	1	1	1	0	0	0	0	0	1	1	0	0	1
ADNP	6	1	0	0	0	1	0	1	1	0	1	0	0	1
AGPAT3	6	1	1	0	1	0	0	1	0	1	1	0	0	0
AKT2	6	1	0	0	1	1	0	1	0	0	0	1	1	0
ANKFY1	6	1	1	0	0	0	0	1	1	0	1	0	0	1
AP3M1	6	1	0	0	0	1	0	1	0	0	0	1	1	1
AP3S2	6	1	0	0	1	0	0	1	1	1	1	0	0	0
APPL1	6	1	1	1	1	0	1	0	0	1	0	0	0	0
AQP4	6	0	1	0	0	0	0	0	1	1	1	1	1	0
ARFGEF2	6	0	0	0	0	0	0	1	1	1	1	1	1	0
ARHGAP1	6	1	1	1	0	0	1	1	0	1	0	0	0	0
ARHGAP35	6	0	1	0	0	1	0	1	1	0	0	1	1	0
ARL5B	6	1	1	0	0	0	1	0	0	0	1	1	1	0
ARL8B	6	1	1	1	0	1	0	0	1	0	0	0	0	1
ARRDC3	6	1	1	1	0	1	0	0	0	0	0	1	1	0
ASAP1	6	1	0	1	0	1	0	1	1	0	1	0	0	0
ATAD2B	6	1	0	1	0	0	0	0	0	1	1	1	1	0
ATL3	6	0	1	0	0	1	0	1	1	1	1	0	0	0
ATP11B	6	1	0	1	1	0	0	0	1	0	0	1	1	0
ATP6V1C1	6	1	0	1	0	0	0	0	1	1	1	0	0	1
BACE1	6	1	0	1	0	1	0	0	0	0	0	1	1	1
BACH2	6	0	0	1	0	1	0	1	1	0	0	1	1	0
BCL11A	6	0	0	0	1	1	0	0	1	1	0	1	1	0
BCL2	6	1	0	0	0	1	1	0	1	0	0	1	1	0
BCL7B	6	1	0	0	1	1	0	1	0	1	1	0	0	0
BLOC1S6	6	1	1	0	0	0	1	0	1	1	1	0	0	0
BTRC	6	1	0	0	0	1	1	1	0	1	0	0	0	1
C11orf87	6	1	1	0	0	1	0	0	0	0	1	1	1	0
C2orf68	6	1	0	1	1	0	0	0	0	1	0	1	1	0
C5orf51	6	1	0	0	0	1	1	1	0	1	1	0	0	0
CA12	6	1	0	1	0	1	0	0	0	0	0	1	1	1
CAPRIN1	6	0	0	1	0	0	0	1	1	1	0	1	1	0
CASP2	6	0	1	0	0	0	0	0	0	1	1	1	1	1
CAV2	6	0	1	1	0	0	0	0	1	1	0	1	1	0
CBL	6	1	0	0	1	1	0	1	0	1	0	0	0	1
CCNA2	6	0	0	1	0	1	0	1	0	0	1	1	1	0
CCND2	6	1	1	1	0	0	0	0	0	0	0	1	1	1
CCNT1	6	1	1	0	0	0	1	0	1	0	1	0	0	1
CDC25B	6	1	0	0	0	1	0	1	0	1	1	0	1	0
CDK14	6	0	1	0	0	1	1	1	0	1	1	0	0	0
CDS1	6	0	0	1	1	1	0	0	1	0	1	0	0	1
CELF1	6	1	1	0	0	1	0	0	1	0	1	0	0	1
CGGBP1	6	0	0	1	0	1	0	0	1	0	1	1	1	0
CHD7	6	1	0	0	0	1	1	1	1	0	1	0	0	0
CHST15	6	0	0	1	1	1	0	1	1	0	1	0	0	0
CIITA	6	0	0	0	0	1	0	1	0	1	0	1	1	1
CNOT4	6	1	1	1	0	1	0	1	1	0	0	0	0	0
CNR1	6	0	1	0	0	1	0	0	1	0	1	1	1	0
CPEB4	6	1	0	1	0	1	0	1	1	0	1	0	0	0
CREB5	6	0	1	1	1	0	0	1	0	0	0	1	1	0
CREBL2	6	1	1	0	1	0	1	1	0	1	0	0	0	0
CRKL	6	1	0	1	0	1	0	0	0	1	0	0	1	1
CSNK1D	6	1	0	1	1	0	0	1	0	1	1	0	0	0
CSNK2A1	6	1	1	1	0	1	0	1	1	0	0	0	0	0
CSRNP3	6	1	1	1	1	0	0	0	1	0	1	0	0	0
CTDSPL2	6	1	1	0	1	0	0	1	0	0	0	1	1	0
CTNNBIP1	6	0	0	0	1	0	1	0	1	1	0	1	1	0
CTTNBP2NL	6	0	1	0	0	1	0	0	1	1	0	1	1	0
CUX1	6	1	0	0	0	1	1	1	0	1	0	0	0	1
CYBRD1	6	0	1	0	1	1	0	0	1	0	0	1	1	0
DCAF7	6	1	0	0	0	1	0	0	0	1	1	1	1	0
DCTN5	6	0	1	0	1	0	0	0	0	1	0	1	1	1
DCUN1D4	6	1	0	0	1	1	0	0	0	0	1	1	1	0
DDAH1	6	0	0	1	0	1	0	0	1	0	1	0	1	1
DDHD1	6	1	1	1	1	0	1	0	1	0	0	0	0	0
DGKE	6	1	1	1	0	0	0	1	0	1	1	0	0	0
DHCR24	6	0	1	0	0	1	1	0	1	1	0	0	1	0
DHX33	6	1	1	0	0	0	0	0	0	1	0	1	1	1
DLC1	6	1	1	1	0	0	1	0	0	1	0	0	0	1
DPYSL3	6	1	0	0	1	0	0	1	0	0	1	1	1	0
E2F2	6	1	1	1	0	0	0	1	0	1	0	0	0	1
EFNA5	6	0	0	1	1	0	0	0	1	0	1	1	1	0
EIF2AK2	6	1	0	1	1	1	1	0	1	0	0	0	0	0
EIF4H	6	0	1	1	0	1	0	0	0	0	0	1	1	1
ELAVL1	6	1	0	0	1	1	0	1	1	0	0	1	0	0
ELL2	6	1	0	1	0	0	1	0	1	0	1	0	1	0
ENTPD7	6	0	1	0	0	0	1	0	0	1	1	1	1	0
EPAS1	6	0	1	1	0	1	0	1	1	0	1	0	0	0
EPHA4	6	1	1	1	0	1	0	0	0	1	1	0	0	0
ERCC4	6	1	1	1	0	1	1	0	0	0	0	0	0	1
EREG	6	0	1	1	0	0	1	0	0	1	0	1	1	0
FAM104A	6	1	0	1	0	1	0	0	0	1	1	0	0	1
FAM126A	6	1	0	0	0	0	1	0	1	0	1	1	1	0
FAM13B	6	0	1	0	0	1	0	0	1	0	1	1	1	0
FAM199X	6	0	1	1	0	0	1	0	1	0	1	0	0	1
FAM210A	6	1	1	1	1	0	0	0	0	0	1	1	0	0
FAS	6	1	1	0	0	0	0	1	1	0	1	0	1	0
FAT3	6	1	0	1	0	0	0	0	1	1	0	1	1	0
FBXW2	6	1	1	0	1	0	1	0	0	0	0	1	0	1
FIGN	6	1	1	0	0	1	0	0	1	1	0	0	1	0
FITM2	6	0	1	1	0	1	0	0	0	1	0	1	1	0
FLRT2	6	1	1	0	1	0	0	1	1	0	1	0	0	0
FMN1	6	1	1	0	0	0	0	1	1	0	1	0	0	1
FXR1	6	0	1	1	0	1	1	0	1	0	1	0	0	0
FYN	6	0	1	1	0	0	0	0	1	0	0	1	1	1
GALNT10	6	1	1	0	1	0	0	0	0	1	1	0	0	1
GALNT2	6	1	0	1	0	0	0	0	0	1	1	1	1	0
GAN	6	1	1	0	1	0	0	1	1	1	0	0	0	0
GAS7	6	1	1	0	0	0	0	0	0	1	0	1	1	1
GFPT1	6	1	0	0	0	1	0	0	1	1	1	0	0	1
GNA13	6	0	1	0	0	0	0	0	1	0	1	1	1	1
GOLT1B	6	1	1	1	0	1	0	0	1	0	1	0	0	0
GPAM	6	1	1	0	0	1	0	0	0	0	1	1	1	0
GPATCH2	6	1	1	0	0	0	0	0	1	0	1	1	1	0
GRIA3	6	1	0	0	1	0	0	0	0	1	1	1	1	0
GXYLT1	6	1	1	1	0	0	0	0	1	1	1	0	0	0
HIC2	6	1	0	0	0	0	1	1	0	1	1	0	0	1
HIP1	6	1	1	0	0	0	0	0	0	0	1	1	1	1
HIPK3	6	0	1	1	1	1	0	0	0	0	1	0	0	1
HNF4A	6	0	0	0	1	1	0	0	0	1	1	1	1	0
HOOK3	6	0	1	0	1	0	1	0	0	1	0	1	1	0
HOXA10	6	1	0	1	0	0	1	0	0	0	1	1	1	0
ICMT	6	1	1	0	0	1	1	0	1	0	1	0	0	0
IKZF1	6	1	1	1	0	1	0	0	0	1	1	0	0	0
INSR	6	1	1	0	1	1	0	0	0	0	1	0	0	1
IPO8	6	0	1	1	0	1	0	1	0	0	1	1	0	0
ITGA5	6	0	0	1	0	1	0	1	0	0	1	1	1	0
ITGA6	6	1	1	1	0	0	0	0	1	0	0	1	1	0
ITGB8	6	1	1	1	0	1	0	0	1	0	1	0	0	0
JAZF1	6	0	1	0	1	0	0	0	1	0	1	1	1	0
KCTD12	6	1	0	0	0	0	1	1	1	1	1	0	0	0
KDM2A	6	0	1	1	0	1	0	0	0	1	0	1	1	0
KIAA0513	6	1	1	0	0	1	0	0	0	1	1	0	1	0
KIAA1549	6	1	0	0	0	1	0	0	0	1	1	1	1	0
KIF5B	6	0	1	0	0	1	1	0	1	0	0	1	1	0
KLF3	6	1	1	1	0	0	0	1	1	0	1	0	0	0
KLF6	6	0	1	1	0	1	0	1	0	1	1	0	0	0
LAMC1	6	1	1	0	0	0	0	1	0	1	0	1	1	0
LEPROT	6	1	1	1	1	0	0	0	1	0	1	0	0	0
LHFPL2	6	1	1	0	0	1	0	0	1	1	1	0	0	0
LIFR	6	1	0	0	0	0	0	0	1	0	1	1	1	1
LIMD1	6	1	0	0	0	1	1	0	1	1	1	0	0	0
LUZP1	6	0	1	0	0	0	0	1	1	0	1	1	1	0
MAP2K4	6	0	0	0	0	0	0	1	1	0	1	1	1	1
MAP3K2	6	1	1	0	0	0	0	0	1	0	1	1	1	0
MAPK10	6	0	0	1	0	1	0	0	1	0	1	1	1	0
MAPK9	6	1	1	0	0	0	1	0	1	0	1	0	0	1
MCFD2	6	0	1	0	0	1	1	1	1	1	0	0	0	0
MED13L	6	1	1	1	0	1	0	0	1	0	1	0	0	0
MGA	6	1	1	0	0	0	0	0	1	0	1	1	1	0
MKI67	6	1	1	0	1	0	1	0	1	1	0	0	0	0
MLEC	6	1	0	1	0	1	0	1	0	1	0	0	0	1
MLXIP	6	1	1	0	0	0	0	0	0	1	1	1	1	0
MOB1A	6	1	0	0	0	1	0	0	1	1	0	1	1	0
MSI2	6	1	1	0	0	1	0	0	1	0	1	0	0	1
MTDH	6	1	1	0	0	0	1	1	1	1	0	0	0	0
MTF2	6	1	0	1	0	0	0	1	1	1	1	0	0	0
MTX3	6	1	0	0	0	0	0	0	1	1	1	1	1	0
MXI1	6	0	1	0	0	0	1	0	0	1	1	1	1	0
MYO9A	6	1	0	0	1	1	0	0	1	1	1	0	0	0
NAA30	6	1	1	1	0	1	0	1	0	0	0	1	0	0
NAA50	6	1	1	1	0	0	1	0	1	0	1	0	0	0
NACC2	6	0	1	1	1	0	0	1	1	0	1	0	0	0
NAPB	6	0	1	0	0	0	0	0	0	1	1	1	1	1
NAT8L	6	1	0	0	0	1	0	1	1	0	1	0	1	0
NAV1	6	0	0	0	0	0	0	1	0	1	1	1	1	1
NCOA3	6	1	1	0	0	0	1	0	0	0	1	1	1	0
NDST1	6	0	0	0	0	0	0	1	1	1	0	1	1	1
NFASC	6	0	0	0	1	1	0	1	0	1	1	0	0	1
NFATC2	6	0	0	0	0	1	1	1	0	1	1	0	0	1
NFE2L1	6	0	1	1	1	0	0	1	0	1	1	0	0	0
NHLRC2	6	1	0	0	0	0	0	0	1	1	0	1	1	1
NLK	6	1	1	0	0	0	1	0	1	1	1	0	0	0
NPTN	6	0	1	1	1	1	0	1	0	0	1	0	0	0
NR6A1	6	1	0	1	1	0	0	0	1	1	1	0	0	0
NT5E	6	1	1	0	0	1	0	1	1	0	0	0	0	1
OTUD3	6	1	1	1	0	0	1	1	1	0	0	0	0	0
OXNAD1	6	1	0	0	0	0	0	1	0	1	0	1	1	1
PAG1	6	1	1	0	0	1	0	0	0	0	0	1	1	1
PARD6B	6	1	1	0	1	0	0	0	1	1	1	0	0	0
PBX1	6	1	0	0	1	1	0	1	1	1	0	0	0	0
PBXIP1	6	0	1	1	0	1	0	1	1	0	1	0	0	0
PCDHA4	6	0	1	0	0	0	0	1	0	1	1	1	1	0
PDE7A	6	1	1	0	0	1	0	1	1	1	0	0	0	0
PDE7B	6	0	0	1	0	1	0	0	1	0	1	1	1	0
PDGFRB	6	0	1	0	0	0	0	0	0	1	1	1	1	1
PDLIM5	6	1	1	0	0	0	1	0	1	1	1	0	0	0
PEAK1	6	0	1	1	1	1	0	0	0	0	1	0	0	1
PEG10	6	1	0	0	1	0	0	1	1	0	1	0	0	1
PEX5L	6	0	1	1	0	1	0	0	1	0	1	0	0	1
PGAP1	6	0	1	1	0	0	0	0	1	0	1	1	1	0
PGR	6	0	0	0	0	1	0	1	1	1	1	0	0	1
PHF3	6	0	1	1	1	1	0	1	0	0	1	0	0	0
PI15	6	1	1	0	1	0	0	0	0	0	0	1	1	1
PIGA	6	1	0	1	0	1	0	0	0	0	1	1	1	0
PIGN	6	1	1	0	0	0	0	1	0	1	0	1	1	0
PIK3R1	6	0	1	0	0	0	0	0	1	0	1	1	1	1
PITPNM2	6	0	0	1	0	1	0	0	0	0	1	1	1	1
PLXNA1	6	1	1	0	0	0	0	0	0	1	1	1	1	0
POGK	6	1	1	1	0	1	0	1	0	1	0	0	0	0
PPP2CA	6	1	1	1	0	0	0	0	1	0	0	1	1	0
PPP6C	6	0	1	0	0	0	0	0	1	1	1	1	1	0
PRICKLE2	6	1	0	1	0	1	0	0	0	0	1	1	1	0
PRKAA2	6	1	0	1	1	0	1	0	1	0	1	0	0	0
PRKCA	6	0	0	0	0	1	0	1	1	1	1	0	0	1
PRRC2C	6	1	0	0	0	1	0	1	0	0	1	1	1	0
PRRG4	6	0	1	1	0	1	1	0	1	1	0	0	0	0
PTK2	6	1	1	0	1	0	0	0	1	1	0	0	0	1
PTP4A1	6	0	1	1	0	1	0	0	0	1	0	1	1	0
PTPRD	6	1	1	1	0	0	0	0	0	1	0	1	1	0
PTPRJ	6	1	1	0	0	1	1	0	1	0	1	0	0	0
RAB10	6	1	1	0	0	1	0	0	1	0	1	0	0	1
RAB5B	6	1	1	1	0	0	1	1	0	1	0	0	0	0
RAP1B	6	0	1	0	0	0	0	1	1	1	1	0	0	1
RAP2B	6	1	1	0	1	0	0	1	1	0	1	0	0	0
RASSF2	6	0	1	1	1	1	0	0	1	1	0	0	0	0
REL	6	1	1	0	1	1	0	0	0	0	0	1	1	0
RICTOR	6	1	0	0	0	1	1	0	0	0	1	1	1	0
RNF165	6	1	1	0	1	0	0	0	0	1	0	1	1	0
RNF168	6	1	0	0	0	0	0	0	1	0	1	1	1	1
RNF217	6	1	1	0	0	1	0	0	0	0	1	1	1	0
ROBO1	6	0	0	0	1	1	0	0	1	0	1	1	1	0
RORA	6	1	1	0	1	0	0	0	0	0	1	1	1	0
RPS6KA3	6	1	1	0	0	1	0	0	0	1	0	1	1	0
RREB1	6	0	1	0	0	0	0	1	1	0	1	1	1	0
RTN3	6	0	0	1	0	1	0	1	1	1	0	0	0	1
SAMD4A	6	0	0	0	0	0	1	0	1	0	1	1	1	1
SAMD8	6	0	1	1	1	0	0	0	1	1	1	0	0	0
SCD	6	1	1	0	0	0	1	1	0	1	0	0	0	1
SEC23A	6	0	1	0	0	1	0	1	1	0	0	1	1	0
SESN1	6	0	1	0	0	0	0	1	0	1	1	1	1	0
SETD5	6	0	0	1	0	0	0	0	1	1	1	1	1	0
SETD7	6	0	0	1	0	0	0	0	0	1	1	1	1	1
SIK1	6	1	1	1	0	1	0	0	0	0	1	0	0	1
SIKE1	6	1	1	0	0	0	0	0	1	0	1	1	1	0
SLC25A44	6	1	1	1	0	1	0	0	0	1	1	0	0	0
SLC30A7	6	1	1	0	0	0	1	0	0	1	1	0	0	1
SLC35B4	6	1	0	0	0	0	1	0	1	1	0	1	1	0
SLC38A2	6	1	1	1	1	1	0	0	1	0	0	0	0	0
SLC5A3	6	1	1	0	0	0	1	0	1	1	1	0	0	0
SLC7A6	6	1	0	0	0	0	0	1	0	1	0	1	1	1
SLC9A6	6	0	1	1	1	1	0	1	1	0	0	0	0	0
SLFN5	6	1	1	0	0	0	0	1	1	0	1	0	0	1
SNRK	6	0	0	0	0	1	0	1	1	0	1	1	1	0
SNTB2	6	0	1	1	0	0	0	0	1	1	1	0	0	1
SOCS6	6	1	1	1	0	0	1	0	1	0	1	0	0	0
SOX11	6	0	1	0	0	1	0	0	1	0	1	1	1	0
SPATA2	6	1	0	1	0	1	0	0	0	1	1	0	0	1
SPIN1	6	1	0	0	0	1	1	0	1	1	0	0	0	1
SPRY4	6	1	1	0	0	0	1	0	0	0	1	1	1	0
STC1	6	0	1	1	1	0	0	0	0	0	0	1	1	1
STEAP2	6	1	0	0	0	0	0	1	1	1	1	0	0	1
STK38L	6	0	0	1	0	1	0	1	1	0	0	1	1	0
SYT14	6	1	1	0	1	0	0	1	0	0	0	1	1	0
SZRD1	6	1	0	1	0	1	0	1	0	1	1	0	0	0
TACC1	6	1	0	1	0	0	0	1	0	1	0	1	1	0
TET3	6	1	1	1	0	0	0	0	1	0	0	1	1	0
TFAM	6	1	1	1	1	0	0	0	1	0	1	0	0	0
TFCP2L1	6	0	0	1	1	0	1	0	0	1	0	0	1	1
TFDP2	6	1	0	1	0	1	0	0	1	1	0	1	0	0
TGIF2	6	0	0	1	0	1	0	0	0	1	0	1	1	1
TGOLN2	6	1	1	1	0	1	0	0	0	0	1	0	0	1
TMEM181	6	0	1	0	0	1	0	0	0	1	0	1	1	1
TMEM30A	6	1	1	1	0	0	1	1	0	0	1	0	0	0
TMEM50B	6	0	1	1	0	1	0	1	0	1	1	0	0	0
TMOD2	6	1	0	0	0	0	0	1	1	1	1	0	0	1
TMTC3	6	1	0	0	0	0	1	0	1	0	1	1	1	0
TNFAIP3	6	1	1	0	0	0	0	0	1	0	1	1	1	0
TNFRSF11A	6	1	0	0	0	1	0	0	1	0	1	1	1	0
TOB2	6	0	0	1	0	0	0	1	1	1	1	0	0	1
TP53	6	1	0	0	0	0	0	1	0	1	1	1	1	0
TP53INP2	6	1	1	0	0	0	0	1	0	0	1	1	1	0
TRAF5	6	1	0	0	0	0	1	0	1	0	0	1	1	1
TRAK2	6	0	0	0	1	1	1	0	1	0	0	1	1	0
TRIOBP	6	0	1	1	0	1	0	1	1	1	0	0	0	0
TSC22D2	6	1	1	1	0	0	0	0	0	1	1	0	0	1
TSC22D3	6	1	1	0	0	1	0	0	0	1	0	1	1	0
TSPYL1	6	0	1	1	1	1	0	0	0	1	1	0	0	0
UBFD1	6	0	1	0	0	1	0	0	0	1	1	1	1	0
UHRF1BP1	6	0	1	0	0	1	1	0	0	0	1	1	1	0
ULK1	6	0	1	0	1	0	0	1	0	0	0	1	1	1
USP31	6	0	1	1	0	1	0	0	0	0	1	1	1	0
USP47	6	1	0	1	1	1	0	1	0	0	1	0	0	0
VAPB	6	0	1	0	0	0	0	1	1	1	1	0	0	1
VASH1	6	0	0	0	0	0	0	1	1	1	0	1	1	1
VCPIP1	6	1	0	1	0	0	0	1	1	1	1	0	0	0
VHL	6	0	1	1	0	0	0	0	1	1	0	1	1	0
VKORC1L1	6	1	1	0	0	1	0	0	1	1	0	0	0	1
WASF2	6	0	0	0	0	1	0	1	1	1	0	1	1	0
WASL	6	1	1	1	0	1	0	0	1	0	1	0	0	0
WNK3	6	1	1	1	0	0	0	0	1	1	1	0	0	0
WWC2	6	0	1	0	1	0	1	1	0	1	0	0	0	1
XKR4	6	0	1	0	1	0	1	0	0	1	0	1	1	0
YOD1	6	1	1	0	0	1	0	0	1	1	0	0	1	0
YTHDC1	6	1	1	0	1	0	0	0	0	1	1	0	0	1
YWHAB	6	0	1	1	1	1	0	0	0	1	1	0	0	0
ZBTB18	6	0	1	1	0	1	1	0	1	0	1	0	0	0
ZBTB20	6	1	1	0	0	0	0	0	0	0	1	1	1	1
ZCCHC14	6	0	0	1	0	1	0	1	0	1	0	1	1	0
ZDHHC23	6	0	0	1	0	1	1	1	0	1	1	0	0	0
ZFP36L1	6	1	0	0	0	0	0	0	1	0	1	1	1	1
ZFP91	6	0	1	1	0	0	0	1	0	1	0	1	1	0
ZFX	6	1	0	0	0	0	1	0	0	0	1	1	1	1
ZHX1	6	0	0	1	1	0	0	0	1	0	1	1	1	0
ZMYM2	6	1	1	0	0	0	0	0	1	0	1	1	1	0
ZNF207	6	1	1	1	0	0	0	1	0	0	1	0	0	1
ZNF3	6	1	0	1	0	1	0	1	0	1	0	0	0	1
ZNF346	6	0	0	0	1	0	1	0	0	1	1	1	1	0
ZNF783	6	1	0	1	0	0	0	0	0	1	1	1	1	0
ZNF805	6	1	1	0	0	0	0	1	0	1	1	0	0	1
ZNRF3	6	1	0	1	1	1	1	0	1	0	0	0	0	0
AAK1	5	1	1	1	1	0	0	0	0	1	0	0	0	0
ABHD5	5	0	1	1	0	0	0	0	0	0	1	1	1	0
ACAP2	5	1	1	0	0	0	0	0	1	0	1	0	0	1
ACER3	5	0	1	0	0	0	0	1	1	1	0	0	1	0
ACOX1	5	1	1	0	0	0	0	0	1	1	1	0	0	0
ACSL1	5	1	0	1	1	0	1	0	0	1	0	0	0	0
ADAM10	5	1	0	0	1	1	0	0	1	0	0	0	0	1
ADAM23	5	0	0	0	0	1	0	0	1	1	0	1	1	0
ADAMTS2	5	0	0	0	0	0	0	0	0	1	1	1	1	1
ADCY1	5	1	0	1	0	1	0	0	1	1	0	0	0	0
ADCY7	5	0	0	0	0	1	1	0	0	1	0	1	1	0
AFAP1	5	0	0	0	0	0	0	1	0	1	1	1	1	0
AGFG1	5	0	1	1	0	1	0	0	0	1	1	0	0	0
AGO2	5	1	0	0	0	1	1	0	0	0	1	0	0	1
AHNAK	5	1	1	0	0	0	0	0	0	0	0	1	1	1
ALCAM	5	1	0	0	0	1	1	1	0	0	1	0	0	0
AMFR	5	0	0	0	0	0	0	1	0	1	0	1	1	1
ANKRD50	5	0	1	1	0	0	0	0	1	0	0	1	1	0
ANO5	5	0	0	0	0	0	0	0	1	1	0	1	1	1
AP4E1	5	1	0	0	0	1	0	0	0	0	1	1	1	0
APAF1	5	1	1	1	0	0	0	0	1	1	0	0	0	0
APC	5	0	1	0	0	1	1	0	0	1	1	0	0	0
APLP2	5	0	1	0	0	1	0	0	1	0	1	0	0	1
ARHGAP32	5	0	0	0	1	0	0	0	1	1	1	0	0	1
ARHGEF7	5	0	1	0	1	1	0	0	0	1	1	0	0	0
ARHGEF9	5	1	1	0	0	1	0	0	1	0	1	0	0	0
ARL4C	5	0	1	0	0	0	1	0	0	0	1	0	1	1
ARRDC4	5	1	0	0	0	0	0	0	1	0	1	1	1	0
ARSB	5	0	0	0	0	0	0	0	1	1	1	1	1	0
ASB1	5	0	1	0	0	1	0	0	1	1	1	0	0	0
ASXL3	5	0	1	0	0	0	0	0	1	1	0	1	1	0
ATG2B	5	0	1	1	1	0	0	1	1	0	0	0	0	0
ATP2A2	5	1	1	1	0	1	0	0	0	1	0	0	0	0
ATP2B1	5	1	1	0	0	0	0	0	0	0	1	1	1	0
ATP2B4	5	1	0	0	0	1	0	0	0	0	0	1	1	1
ATP6V1A	5	0	0	0	0	0	0	1	0	1	1	1	1	0
AVL9	5	1	1	0	1	0	0	0	1	1	0	0	0	0
B4GALT6	5	1	1	0	0	1	1	0	1	0	0	0	0	0
BBC3	5	0	0	0	0	1	0	0	0	1	1	1	1	0
BBX	5	1	1	1	0	0	0	0	0	0	1	0	0	1
BCL7A	5	1	0	0	0	1	0	0	0	1	1	1	0	0
BCL9L	5	1	0	0	0	0	0	1	1	0	0	1	1	0
BCORL1	5	1	0	0	1	0	0	0	0	0	1	1	1	0
BEND4	5	1	1	0	0	1	0	0	0	0	1	0	0	1
BHLHE41	5	0	1	1	1	1	0	0	0	0	1	0	0	0
BIRC6	5	1	0	1	0	0	0	0	1	0	0	1	1	0
BLCAP	5	0	0	1	0	1	1	0	1	0	1	0	0	0
BRD3	5	1	0	0	0	0	1	1	0	0	0	1	1	0
BRD4	5	0	0	0	0	1	0	1	0	0	0	1	1	1
BTAF1	5	0	1	1	0	1	0	0	1	1	0	0	0	0
BTBD3	5	1	1	1	0	1	0	0	1	0	0	0	0	0
BTBD9	5	1	1	0	1	1	0	1	0	0	0	0	0	0
BTF3L4	5	0	1	1	1	0	1	0	0	1	0	0	0	0
BTG1	5	0	1	1	0	0	0	1	1	0	1	0	0	0
BVES	5	0	1	0	0	0	0	0	0	1	1	1	1	0
C11orf54	5	0	1	0	0	0	0	1	0	1	0	1	1	0
C12orf4	5	1	0	0	1	1	0	0	0	0	0	1	1	0
C19orf47	5	1	0	0	0	1	1	1	0	1	0	0	0	0
C1GALT1	5	1	1	0	0	1	0	0	0	0	1	0	0	1
C21orf91	5	1	0	0	0	0	1	1	0	0	0	1	1	0
C2CD4A	5	1	1	0	0	0	0	0	0	0	1	1	1	0
C3orf38	5	1	1	0	1	0	0	0	1	0	0	0	0	1
C6orf120	5	1	1	0	0	0	1	0	0	1	1	0	0	0
C6orf62	5	0	1	1	0	1	0	1	1	0	0	0	0	0
C9orf72	5	1	0	0	1	0	0	0	0	1	0	1	1	0
CAB39	5	0	0	0	0	1	0	1	1	0	1	0	0	1
CALCR	5	0	0	0	0	0	0	1	1	1	0	1	1	0
CALM1	5	1	1	0	0	1	0	1	0	1	0	0	0	0
CALM3	5	1	0	0	0	0	0	1	0	0	1	1	1	0
CALN1	5	1	1	0	0	0	0	1	1	0	1	0	0	0
CAMSAP1	5	1	1	1	1	0	0	0	1	0	0	0	0	0
CAMTA1	5	0	1	1	1	0	0	0	1	0	1	0	0	0
CAPRIN2	5	0	1	1	0	0	0	1	0	0	1	0	0	1
CBFA2T2	5	0	1	1	0	0	0	0	1	1	1	0	0	0
CBFB	5	1	1	1	0	0	1	0	0	0	1	0	0	0
CBLB	5	0	0	1	0	1	0	0	1	0	1	0	0	1
CBX2	5	1	0	0	0	0	0	0	0	1	1	1	1	0
CCDC6	5	0	1	1	1	1	0	0	1	0	0	0	0	0
CCDC85C	5	1	0	0	0	1	0	1	0	1	0	0	1	0
CCNF	5	1	0	0	0	0	0	1	0	1	0	1	1	0
CCNI2	5	0	0	0	0	0	0	1	0	1	0	1	1	1
CCNJ	5	1	0	0	1	0	0	0	0	0	1	1	1	0
CD164	5	1	1	0	0	1	1	0	0	1	0	0	0	0
CDC23	5	0	1	0	0	0	0	0	1	0	0	1	1	1
CDC25A	5	1	1	0	0	0	1	0	0	1	1	0	0	0
CDC42	5	0	1	1	0	0	0	0	1	0	0	1	1	0
CDCA4	5	0	1	1	0	0	1	0	0	0	0	1	1	0
CDK19	5	0	0	1	0	1	0	0	1	1	1	0	0	0
CEP350	5	1	1	1	0	1	0	0	1	0	0	0	0	0
CEP57L1	5	1	1	0	0	0	0	0	1	1	1	0	0	0
CEP63	5	1	1	0	0	0	0	1	1	0	1	0	0	0
CHD9	5	1	1	1	0	0	0	1	0	1	0	0	0	0
CHIC1	5	1	1	1	0	1	0	0	0	1	0	0	0	0
CLCN6	5	0	0	1	1	1	0	0	0	1	1	0	0	0
CLIC4	5	1	1	1	0	0	0	1	0	0	1	0	0	0
CLMN	5	1	1	0	0	0	0	0	0	0	0	1	1	1
CMKLR1	5	0	1	0	1	0	0	0	0	1	1	0	0	1
CMPK1	5	0	1	1	0	0	1	0	0	0	0	1	1	0
CMTM6	5	0	1	0	1	0	1	0	0	1	0	0	0	1
CNIH4	5	1	0	0	1	1	0	1	0	1	0	0	0	0
CNKSR3	5	1	1	0	0	0	0	0	1	0	0	1	1	0
CNOT1	5	1	0	1	0	0	0	0	1	0	1	0	0	1
CNOT7	5	1	1	1	0	1	0	0	0	0	1	0	0	0
COL4A2	5	1	1	0	0	0	0	0	1	0	0	1	1	0
COL5A1	5	1	0	0	0	0	1	0	0	0	1	1	1	0
CORO1C	5	0	1	0	0	0	0	1	1	0	0	1	1	0
COX19	5	0	1	0	0	0	1	1	1	0	1	0	0	0
CPM	5	1	0	0	1	0	0	0	0	1	0	1	1	0
CPSF6	5	0	0	1	1	0	1	0	1	0	0	0	0	1
CPSF7	5	1	0	0	0	0	0	0	1	0	0	1	1	1
CPT1A	5	1	1	0	0	1	0	1	0	1	0	0	0	0
CSRNP2	5	1	0	0	0	0	0	0	1	1	0	1	1	0
CTC1	5	0	0	0	0	0	0	1	1	0	1	1	1	0
CTCF	5	0	1	0	0	0	1	0	1	1	1	0	0	0
CTDSP2	5	0	1	0	0	0	0	1	0	1	1	0	1	0
CTDSPL	5	0	0	0	0	0	0	1	1	1	1	0	1	0
CTNND1	5	0	1	0	0	0	0	0	1	0	1	1	1	0
CYP1B1	5	0	0	0	0	1	0	1	0	0	1	0	1	1
DBT	5	0	1	0	0	0	1	0	0	0	0	1	1	1
DCAF12	5	0	0	0	1	0	0	0	1	0	1	1	1	0
DCLK1	5	0	0	0	0	0	0	0	1	1	0	1	1	1
DCUN1D1	5	1	1	0	0	1	0	0	1	0	0	1	0	0
DENND2C	5	0	0	0	0	0	0	0	1	1	1	1	1	0
DENND5B	5	0	1	0	0	0	0	0	1	0	0	1	1	1
DEPDC1	5	1	1	1	0	0	0	0	1	1	0	0	0	0
DIAPH1	5	1	0	0	0	1	0	1	0	1	1	0	0	0
DIP2C	5	0	1	1	0	0	0	0	1	0	0	1	1	0
DLGAP2	5	0	0	0	0	0	0	1	1	1	0	1	1	0
DNAJB4	5	0	1	0	1	1	0	0	1	0	1	0	0	0
DNAJC10	5	1	1	0	0	1	0	0	0	1	0	0	0	1
DOT1L	5	0	0	0	0	0	0	0	1	1	1	1	1	0
DPYSL2	5	0	1	1	0	0	0	1	0	0	0	1	1	0
DPYSL5	5	1	1	0	0	0	0	0	0	1	0	1	1	0
DRAXIN	5	0	1	0	0	0	0	0	0	1	1	0	1	1
DST	5	1	0	1	0	1	1	0	0	0	0	0	0	1
DTX4	5	1	0	1	0	1	0	0	0	0	0	1	1	0
DVL3	5	1	1	0	0	0	0	0	0	1	0	1	1	0
DYRK1A	5	0	0	0	0	1	1	0	1	0	1	0	0	1
E2F6	5	1	0	0	1	0	1	0	1	0	1	0	0	0
EAF1	5	1	1	0	0	1	1	0	0	0	0	0	0	1
EDEM3	5	1	0	0	1	0	0	0	0	0	1	1	1	0
EGR1	5	0	0	0	1	0	1	0	1	1	1	0	0	0
EGR3	5	1	1	0	0	1	0	0	1	1	0	0	0	0
EIF3J	5	1	0	0	1	0	0	0	0	1	0	1	1	0
EIF4EBP2	5	1	0	1	1	0	0	1	1	0	0	0	0	0
EIF4G2	5	1	1	1	1	0	0	0	0	1	0	0	0	0
EMC1	5	1	1	0	1	0	1	0	0	1	0	0	0	0
EOGT	5	1	1	1	0	1	1	0	0	0	0	0	0	0
EPB41	5	1	0	0	0	0	0	1	0	1	1	0	0	1
EPG5	5	1	1	0	0	1	0	0	1	1	0	0	0	0
ERBB3	5	0	1	1	0	1	0	1	0	1	0	0	0	0
ERBB4	5	0	0	0	1	0	0	1	1	0	1	0	0	1
ERCC6	5	1	0	0	0	0	1	0	1	0	0	1	1	0
ERRFI1	5	0	0	0	1	1	0	0	0	0	0	1	1	1
ESYT2	5	0	0	0	1	1	0	1	0	1	0	0	0	1
EXOC5	5	0	1	1	0	0	0	0	1	1	0	0	0	1
EZH1	5	0	1	0	0	1	0	0	1	0	1	0	0	1
F3	5	1	1	1	0	1	0	0	0	0	1	0	0	0
FAF2	5	0	1	1	1	0	0	1	0	0	1	0	0	0
FAM120AOS	5	0	0	0	1	0	1	0	1	1	1	0	0	0
FAM135A	5	1	1	1	0	0	0	0	0	0	0	1	1	0
FAM136A	5	1	0	0	0	0	1	1	0	0	1	0	1	0
FAM217B	5	1	1	1	0	0	0	0	0	1	1	0	0	0
FAM43A	5	1	1	1	0	1	0	1	0	0	0	0	0	0
FAR1	5	1	0	0	1	0	0	0	1	1	1	0	0	0
FBXO28	5	0	1	1	1	1	0	0	0	0	1	0	0	0
FBXO30	5	1	1	0	1	0	0	1	0	0	1	0	0	0
FBXO32	5	1	1	0	0	0	0	0	1	1	1	0	0	0
FBXO45	5	1	0	0	0	0	0	1	0	0	1	1	1	0
FBXW11	5	1	0	1	1	0	0	0	1	0	0	0	0	1
FBXW7	5	0	0	0	0	0	0	1	0	1	1	1	1	0
FECH	5	1	1	0	0	0	0	0	1	0	0	1	1	0
FERMT2	5	0	1	1	0	0	0	0	1	0	0	1	1	0
FGD4	5	0	1	0	0	0	0	0	1	1	0	1	1	0
FGD6	5	1	0	0	0	0	0	1	1	1	1	0	0	0
FKTN	5	1	0	1	0	0	1	1	1	0	0	0	0	0
FLT1	5	0	1	0	0	1	0	0	1	1	0	0	0	1
FNDC3B	5	1	1	0	0	0	1	0	1	0	0	0	0	1
FNDC5	5	1	0	0	0	0	0	0	1	1	0	1	1	0
FOXK1	5	1	1	0	0	0	0	1	1	1	0	0	0	0
FOXN2	5	0	0	1	0	1	0	1	0	0	1	0	1	0
FOXO3	5	0	0	0	0	0	0	1	1	0	1	1	1	0
FOXP1	5	1	1	0	0	1	0	1	0	0	0	0	1	0
FYCO1	5	0	1	1	0	1	0	0	0	0	0	0	1	1
GAB1	5	0	1	0	0	0	0	0	1	0	1	1	1	0
GABRA4	5	1	0	1	1	0	0	0	1	1	0	0	0	0
GATA6	5	1	1	0	0	0	0	0	0	1	1	0	0	1
GATAD1	5	0	1	0	1	0	1	1	0	0	1	0	0	0
GID4	5	0	1	0	0	1	0	0	0	1	0	1	1	0
GLCE	5	0	1	1	0	1	0	0	1	0	1	0	0	0
GNPTAB	5	1	1	1	0	1	0	1	0	0	0	0	0	0
GOLGA1	5	0	1	1	0	1	0	1	0	0	1	0	0	0
GPI	5	1	0	0	0	1	0	0	0	0	1	1	1	0
GPR155	5	1	1	1	0	0	0	0	1	1	0	0	0	0
GPRIN3	5	1	1	0	0	0	0	1	0	0	0	1	1	0
GRIN2B	5	1	0	0	0	0	1	1	1	1	0	0	0	0
GRIN3A	5	1	0	1	1	0	0	0	0	1	1	0	0	0
GSK3B	5	0	0	0	0	0	0	0	1	1	1	1	1	0
GSPT1	5	1	0	1	0	0	0	1	1	0	1	0	0	0
GTPBP10	5	1	1	1	0	1	0	0	0	1	0	0	0	0
GTPBP2	5	1	1	1	0	0	0	0	0	0	0	1	1	0
HAS2	5	1	1	0	0	0	0	0	1	0	0	1	1	0
HMGB1	5	1	1	0	0	1	0	1	0	0	0	1	0	0
HNF4G	5	0	0	0	0	0	0	1	1	0	1	1	1	0
HNRNPF	5	1	0	0	0	0	0	1	0	0	1	1	1	0
HNRNPUL1	5	1	0	1	0	0	0	0	1	0	0	1	1	0
HOMER1	5	1	0	1	0	1	0	1	1	0	0	0	0	0
HP1BP3	5	0	1	0	1	0	0	0	0	1	0	1	1	0
HRK	5	0	1	1	0	0	0	0	0	0	1	1	1	0
IBA57	5	1	1	0	0	0	0	1	0	1	1	0	0	0
IGSF3	5	1	0	1	0	1	0	0	0	0	0	0	1	1
INTS6	5	1	1	1	0	0	0	0	1	0	0	0	0	1
IPCEF1	5	1	1	0	0	1	0	0	1	0	1	0	0	0
IQCE	5	0	0	0	1	1	0	1	0	0	1	0	0	1
IREB2	5	0	0	0	1	0	0	0	0	0	1	1	1	1
IRF1	5	0	1	1	0	1	0	0	1	1	0	0	0	0
IRF2BP2	5	1	1	1	0	0	0	0	1	0	0	0	1	0
IRGQ	5	1	0	0	0	0	0	0	0	1	1	1	1	0
ISL1	5	1	0	0	0	0	0	0	1	0	1	1	1	0
ITGA2	5	1	1	1	0	0	0	0	0	0	1	0	0	1
ITGB1	5	0	1	0	0	0	1	0	1	0	0	1	1	0
ITPK1	5	0	0	1	0	1	0	0	1	1	1	0	0	0
ITPRIPL2	5	0	1	1	1	0	0	1	0	0	0	0	0	1
JAK1	5	0	1	1	0	1	0	0	1	1	0	0	0	0
KAT7	5	0	1	1	1	1	0	1	0	0	0	0	0	0
KBTBD6	5	1	0	1	1	0	0	0	0	0	1	0	0	1
KCNC2	5	1	0	1	0	0	0	0	0	0	1	1	1	0
KCTD20	5	0	0	1	0	0	0	0	1	0	1	1	1	0
KDM5B	5	1	1	1	0	0	0	0	0	0	0	1	1	0
KHNYN	5	1	0	1	0	0	0	1	1	1	0	0	0	0
KIAA0040	5	1	0	0	1	0	0	1	1	0	1	0	0	0
KIAA0895	5	1	1	0	0	0	0	0	0	0	1	1	1	0
KIAA1522	5	0	1	0	0	0	0	1	0	0	0	1	1	1
KIAA1671	5	1	1	0	0	0	1	0	0	1	0	1	0	0
KIF24	5	0	0	0	1	0	1	1	0	0	0	1	1	0
KIF3B	5	0	1	0	0	0	0	0	0	1	1	1	0	1
KMT2A	5	0	0	1	0	1	1	1	0	0	1	0	0	0
KPNA3	5	0	1	1	0	0	1	0	0	1	1	0	0	0
KPNA5	5	1	1	0	1	0	0	0	1	0	1	0	0	0
KPNA6	5	1	1	0	0	0	0	0	0	1	1	0	0	1
LARP1	5	1	1	0	0	0	0	1	0	1	1	0	0	0
LCORL	5	0	1	1	0	0	0	0	0	0	1	1	1	0
LDLR	5	1	1	1	0	1	0	0	0	0	1	0	0	0
LIF	5	0	1	0	0	0	0	0	0	0	1	1	1	1
LIMA1	5	0	1	0	0	0	0	0	1	0	1	1	1	0
LIN28B	5	1	1	0	0	0	0	1	1	0	1	0	0	0
LIPG	5	0	0	1	0	1	0	0	1	1	0	0	0	1
LMNB1	5	0	0	0	0	0	0	0	1	0	1	1	1	1
LMNB2	5	0	0	0	0	0	1	1	0	1	1	0	0	1
LNPEP	5	0	1	1	1	1	0	0	0	0	1	0	0	0
LPIN1	5	0	1	1	0	0	0	0	1	0	1	0	0	1
LPL	5	1	0	0	0	0	0	0	0	1	1	1	1	0
LRIG1	5	1	1	1	0	0	1	0	1	0	0	0	0	0
LRP6	5	0	0	1	0	0	0	0	0	1	1	1	1	0
LRP8	5	0	1	1	0	1	1	0	0	0	1	0	0	0
LRRC20	5	1	1	0	0	0	0	1	0	1	0	0	0	1
LRRC59	5	1	1	0	0	0	0	1	0	1	0	0	0	1
LRRC8B	5	1	0	0	1	1	0	1	0	0	1	0	0	0
LYPLA1	5	0	0	1	1	0	0	0	1	0	0	1	1	0
LYRM7	5	0	0	0	0	0	1	0	1	0	1	1	1	0
MAP7	5	1	1	1	0	0	0	0	1	1	0	0	0	0
MAPKAPK2	5	0	0	0	0	1	0	1	0	1	0	1	1	0
MARCKS	5	1	0	0	0	0	0	0	1	0	1	1	1	0
MARCKSL1	5	1	0	0	0	0	0	0	1	1	1	0	1	0
MARVELD3	5	0	1	1	1	0	0	0	1	1	0	0	0	0
MBNL3	5	0	1	1	0	0	1	0	0	1	1	0	0	0
MCL1	5	0	1	0	0	0	1	0	0	0	1	1	1	0
MED13	5	0	1	0	1	0	1	0	0	1	1	0	0	0
MED14	5	1	0	1	0	1	1	0	0	0	1	0	0	0
MEF2C	5	1	0	0	0	0	0	0	1	0	1	1	1	0
MEF2D	5	1	0	0	0	0	0	0	1	1	1	0	0	1
MET	5	0	1	1	0	1	0	0	1	0	1	0	0	0
MIB1	5	1	0	0	0	0	1	0	0	1	0	1	1	0
MICB	5	1	1	0	0	0	0	1	0	0	0	1	1	0
MID1	5	1	1	0	1	0	0	0	1	1	0	0	0	0
MLLT6	5	0	1	1	0	1	1	0	0	1	0	0	0	0
MMD	5	1	0	1	0	1	0	0	0	0	1	0	1	0
MPZL1	5	1	0	0	0	1	1	0	0	1	1	0	0	0
MPZL3	5	1	0	0	0	0	0	1	0	0	1	1	1	0
MR1	5	1	0	0	1	0	0	1	0	1	1	0	0	0
MRS2	5	1	1	1	1	0	0	0	0	0	1	0	0	0
MXRA7	5	1	0	0	1	0	1	0	0	1	0	0	0	1
MYH10	5	1	0	1	0	0	0	1	1	0	1	0	0	0
MYH9	5	0	1	0	0	0	0	1	0	1	1	0	0	1
MYO1D	5	0	1	1	1	1	1	0	0	0	0	0	0	0
MYO1E	5	1	0	0	1	0	0	0	0	1	0	1	1	0
MYO5A	5	0	0	1	0	0	0	1	0	1	0	1	0	1
N4BP1	5	1	1	0	0	0	0	0	1	0	1	0	0	1
N4BP2	5	0	1	0	0	0	1	1	0	0	0	1	1	0
NAA15	5	1	0	1	0	1	0	1	1	0	0	0	0	0
NANOS1	5	0	1	0	0	0	0	0	0	1	1	1	1	0
NAP1L3	5	0	0	1	0	0	0	0	1	0	1	1	1	0
NCKAP5	5	0	1	1	0	0	0	0	0	0	1	1	1	0
NDUFA10	5	1	0	0	0	0	0	1	0	1	1	0	1	0
NEBL	5	1	1	0	0	0	0	1	0	0	1	0	0	1
NEK9	5	1	1	1	0	0	1	0	0	1	0	0	0	0
NEO1	5	0	0	1	1	1	0	0	0	1	1	0	0	0
NFIC	5	0	1	0	1	0	0	1	0	0	0	1	1	0
NKD1	5	1	0	0	1	0	0	0	1	1	0	0	0	1
NPTX1	5	1	1	1	0	1	0	0	0	1	0	0	0	0
NR3C1	5	0	1	0	0	0	0	1	0	0	1	1	1	0
NRBP1	5	0	1	1	0	0	0	0	0	0	1	1	1	0
NREP	5	0	0	0	0	0	1	0	0	1	1	1	1	0
NRP2	5	1	0	1	0	0	0	0	0	1	1	0	0	1
NT5DC3	5	1	0	0	0	1	1	0	0	1	0	0	0	1
NUP133	5	0	1	1	0	1	0	0	1	0	1	0	0	0
NUS1	5	0	0	1	0	1	0	1	1	0	1	0	0	0
NXF1	5	0	1	0	0	0	0	0	0	1	1	1	1	0
OCRL	5	0	1	1	0	0	1	0	0	0	1	0	0	1
OPALIN	5	1	0	0	1	0	0	0	0	1	0	1	1	0
OSMR	5	1	0	1	1	1	0	0	0	1	0	0	0	0
OTUB2	5	0	0	0	0	0	1	0	0	1	0	1	1	1
PAIP2B	5	0	1	1	0	0	0	1	0	1	1	0	0	0
PAK6	5	0	1	1	0	0	1	0	1	0	1	0	0	0
PANK3	5	1	1	0	0	0	0	0	1	1	0	0	0	1
PAPPA	5	1	0	0	1	1	0	0	0	0	1	0	0	1
PATZ1	5	0	0	0	0	0	0	0	1	1	1	1	1	0
PCGF5	5	1	0	1	0	0	1	1	0	0	1	0	0	0
PDE4DIP	5	0	0	1	0	1	0	1	1	0	0	0	0	1
PDPK1	5	0	1	0	0	0	0	1	1	1	1	0	0	0
PDPR	5	1	1	0	0	1	0	1	1	0	0	0	0	0
PDS5B	5	0	0	0	0	0	0	1	1	0	1	1	1	0
PEX19	5	1	0	0	1	0	0	0	1	1	0	0	0	1
PGM2L1	5	1	1	1	1	0	0	0	0	0	1	0	0	0
PHF20	5	0	0	1	0	1	0	0	0	1	1	0	0	1
PIAS2	5	0	1	0	0	0	0	0	1	1	0	1	1	0
PIGS	5	0	0	1	0	1	0	0	0	1	0	1	1	0
PIK3C3	5	0	1	1	0	0	0	0	0	0	0	1	1	1
PIK3CB	5	0	0	1	0	0	0	0	1	1	0	1	1	0
PIP4K2B	5	0	0	0	1	0	1	1	1	0	1	0	0	0
PKNOX1	5	0	1	0	1	0	0	0	1	0	1	0	1	0
PLEKHA1	5	0	0	0	0	0	0	1	0	0	1	1	1	1
PLEKHA2	5	1	0	0	0	1	0	0	1	1	1	0	0	0
PLEKHA3	5	1	1	0	0	0	0	1	1	0	1	0	0	0
PLEKHF2	5	0	0	1	0	0	1	0	1	0	0	1	1	0
PLXNC1	5	1	1	0	0	0	0	0	1	0	0	1	1	0
POC1B-GALNT4	5	1	1	1	0	1	0	0	0	0	1	0	0	0
POGZ	5	1	0	1	0	0	0	0	1	1	1	0	0	0
POLR2D	5	1	1	1	0	1	0	0	0	1	0	0	0	0
POLR3A	5	1	1	0	1	0	0	0	1	1	0	0	0	0
POM121	5	1	0	0	0	0	0	1	1	0	1	0	0	1
PPFIBP1	5	1	0	0	0	1	0	1	1	1	0	0	0	0
PPIG	5	0	0	1	0	0	0	0	1	0	1	1	1	0
PPM1F	5	0	0	1	0	1	1	1	0	1	0	0	0	0
PPM1L	5	0	0	0	0	1	0	1	1	1	0	0	0	1
PPP2R5E	5	1	0	1	0	0	0	0	1	1	0	0	0	1
PPP3R1	5	1	1	0	0	0	0	0	0	1	1	0	0	1
PRDM1	5	1	0	0	0	0	0	0	1	1	0	1	1	0
PRKACB	5	0	1	1	1	1	0	0	1	0	0	0	0	0
PRKAR1A	5	0	1	0	0	0	1	1	1	0	1	0	0	0
PRKD3	5	1	1	1	0	0	1	0	0	0	1	0	0	0
PRKG1	5	0	0	1	0	0	1	0	0	0	1	1	1	0
PRNP	5	0	1	1	0	1	1	1	0	0	0	0	0	0
PRPF40A	5	0	0	0	1	0	0	0	0	1	1	1	1	0
PRRC1	5	0	1	1	0	1	1	1	0	0	0	0	0	0
PRRC2B	5	1	0	0	0	0	0	1	1	1	0	0	0	1
PRRG1	5	0	1	1	0	1	0	0	1	0	0	0	0	1
PSEN1	5	0	1	0	0	1	0	1	1	0	1	0	0	0
PSMF1	5	0	0	0	1	0	0	0	1	1	0	1	1	0
PTAFR	5	1	0	0	0	1	0	0	0	1	1	0	0	1
PTGS1	5	0	1	0	0	1	0	1	1	0	1	0	0	0
PTPN1	5	0	0	0	1	0	1	1	1	0	0	0	0	1
RAB11FIP2	5	1	1	0	0	0	1	0	1	1	0	0	0	0
RAB12	5	0	1	1	0	1	0	0	0	0	0	1	1	0
RAB14	5	0	1	1	0	1	0	0	1	0	1	0	0	0
RAB15	5	1	0	0	0	0	0	0	0	1	0	1	1	1
RAB3IP	5	1	1	0	0	1	0	0	1	0	1	0	0	0
RAB6B	5	1	0	1	0	0	0	0	0	1	0	1	1	0
RABEP1	5	1	1	0	1	0	0	0	0	1	0	0	1	0
RAD1	5	0	0	1	0	0	1	0	0	1	1	1	0	0
RAD18	5	1	1	0	0	1	0	1	0	0	0	0	0	1
RAG1	5	1	0	1	0	1	0	0	1	0	1	0	0	0
RAN	5	0	1	1	0	0	0	1	0	1	0	0	0	1
RAP1GAP2	5	1	1	0	0	0	1	1	1	0	0	0	0	0
RAP2A	5	1	0	0	0	1	0	0	0	1	1	0	1	0
RAPGEF2	5	0	1	1	0	0	0	0	1	1	1	0	0	0
RASSF3	5	1	1	1	0	0	0	0	1	0	1	0	0	0
RB1	5	1	1	1	0	0	1	0	1	0	0	0	0	0
RBM12B	5	1	1	0	0	1	0	0	1	0	1	0	0	0
RBM33	5	0	1	1	0	0	0	0	0	0	0	1	1	1
RBMS2	5	1	0	0	1	0	0	1	0	1	0	0	0	1
RDX	5	1	1	1	0	0	0	0	1	0	0	0	0	1
REEP1	5	1	0	1	0	0	1	0	1	1	0	0	0	0
REST	5	0	1	0	0	0	0	1	0	0	0	1	1	1
RFX3	5	1	0	1	0	0	0	0	1	1	1	0	0	0
RFXAP	5	0	1	1	0	0	0	0	0	0	1	1	1	0
RNASEL	5	0	1	0	0	1	1	0	0	0	0	1	1	0
RND3	5	0	1	0	0	0	0	0	1	0	1	1	1	0
RNF141	5	0	0	0	0	0	1	0	1	0	1	1	1	0
RNF41	5	1	0	1	0	0	0	0	0	1	1	0	0	1
RNF8	5	1	1	0	0	0	0	1	0	1	1	0	0	0
RORB	5	1	1	1	0	0	0	0	1	0	1	0	0	0
RPS6KA5	5	0	1	1	0	1	0	0	0	1	1	0	0	0
RPS6KB1	5	0	0	1	0	1	1	0	0	1	1	0	0	0
RSBN1	5	0	1	0	0	0	1	1	1	0	0	0	0	1
RSF1	5	1	1	0	1	0	0	0	1	0	1	0	0	0
RUFY2	5	0	1	0	1	0	0	1	1	1	0	0	0	0
RUFY3	5	1	0	0	0	0	1	1	0	0	1	0	1	0
RUNX1	5	0	1	0	0	0	1	1	0	0	1	0	0	1
RUNX3	5	1	1	1	1	1	0	0	0	0	0	0	0	0
RYBP	5	0	1	0	0	0	0	0	1	0	1	1	1	0
SACS	5	0	1	0	0	1	0	0	1	0	0	1	1	0
SAMD12	5	0	1	1	0	1	0	0	1	0	0	0	0	1
SAMD5	5	1	1	0	0	0	0	1	0	1	0	0	1	0
SATB2	5	0	0	1	0	0	1	1	1	0	1	0	0	0
SBF2	5	0	0	1	0	1	0	0	0	0	1	1	1	0
SCAMP2	5	0	1	1	0	0	0	0	1	1	0	0	0	1
SCML1	5	1	0	0	0	0	0	0	0	1	0	1	1	1
SDHAF2	5	0	1	1	0	1	0	0	1	1	0	0	0	0
SDK1	5	1	0	0	0	0	0	0	0	1	0	1	1	1
SEC23B	5	1	0	1	0	0	1	1	1	0	0	0	0	0
SEC61A1	5	0	0	0	1	1	0	0	0	1	1	0	0	1
SECISBP2L	5	1	0	1	0	1	0	0	0	0	1	0	0	1
SEMA4F	5	1	0	0	1	0	0	1	0	1	1	0	0	0
SENP1	5	0	1	0	0	0	0	0	0	1	1	1	1	0
SENP5	5	1	1	0	0	1	1	1	0	0	0	0	0	0
SERPINE1	5	0	0	1	0	1	1	1	0	0	0	0	0	1
SFXN5	5	0	1	0	0	1	0	0	1	1	0	0	1	0
SGPL1	5	0	1	1	0	0	0	1	0	1	1	0	0	0
SGTB	5	0	1	0	0	0	0	0	0	1	1	1	1	0
SH3PXD2B	5	1	0	0	0	0	0	1	0	1	0	1	1	0
SHROOM2	5	0	0	0	0	0	0	1	1	1	0	1	1	0
SIPA1L1	5	0	1	0	1	0	0	0	1	1	1	0	0	0
SIRT1	5	0	0	0	0	0	1	1	1	0	0	1	1	0
SIX4	5	0	0	1	1	1	1	0	1	0	0	0	0	0
SKIDA1	5	1	1	1	0	1	0	0	0	1	0	0	0	0
SLC16A10	5	1	1	1	0	0	0	0	0	0	1	0	0	1
SLC16A6	5	1	1	0	0	1	1	0	1	0	0	0	0	0
SLC22A23	5	1	1	0	0	0	0	0	0	1	1	0	0	1
SLC24A4	5	0	1	0	0	1	1	0	0	1	1	0	0	0
SLC2A14	5	1	0	0	1	0	0	0	0	0	0	1	1	1
SLC30A1	5	1	1	0	0	0	0	0	1	0	0	1	1	0
SLC39A9	5	0	0	0	0	0	1	0	0	1	0	1	1	1
SLC46A1	5	0	0	1	0	1	0	0	0	1	1	0	1	0
SLC6A6	5	1	0	1	0	0	0	0	1	1	1	0	0	0
SLC6A8	5	0	1	0	0	0	0	1	0	1	1	0	0	1
SLITRK4	5	0	1	0	1	0	0	1	0	0	1	0	1	0
SMG1	5	1	0	1	0	0	0	0	1	1	1	0	0	0
SNX12	5	1	1	0	0	0	0	1	0	1	1	0	0	0
SNX24	5	0	0	0	0	1	1	0	1	0	0	1	1	0
SNX30	5	1	1	0	0	0	0	0	1	0	1	0	0	1
SOS1	5	0	1	1	0	1	0	0	0	1	1	0	0	0
SOX4	5	0	1	1	1	0	0	1	0	0	1	0	0	0
SPEN	5	0	1	1	0	0	0	0	0	0	1	1	1	0
SPOPL	5	0	1	1	0	0	0	0	1	1	0	0	0	1
SPTBN1	5	1	1	0	0	0	0	1	0	0	1	0	1	0
SRGAP3	5	1	1	0	0	0	0	0	1	1	0	0	0	1
SRPK1	5	0	1	1	1	0	0	1	1	0	0	0	0	0
SRPK2	5	0	1	1	0	0	0	0	1	0	0	0	1	1
SRSF6	5	0	1	0	1	0	1	0	1	0	1	0	0	0
SSR3	5	0	1	0	1	1	0	0	1	1	0	0	0	0
SSX2IP	5	1	1	1	1	0	0	1	0	0	0	0	0	0
STK35	5	0	1	0	0	0	0	0	1	1	0	1	1	0
STK38	5	1	1	1	0	0	0	1	0	0	0	1	0	0
SULF1	5	0	1	1	0	1	0	1	0	0	0	0	0	1
SV2B	5	0	1	0	0	0	0	0	1	1	1	0	0	1
SYNM	5	0	1	1	0	1	1	0	0	0	1	0	0	0
SYNRG	5	0	0	1	0	0	0	1	1	1	1	0	0	0
SYT7	5	1	1	0	0	0	0	0	0	1	0	1	1	0
TAF8	5	1	0	0	1	0	0	1	0	1	1	0	0	0
TBC1D24	5	0	0	0	1	0	0	0	0	1	0	1	1	1
TBKBP1	5	1	0	1	0	1	1	0	0	0	1	0	0	0
TCF4	5	0	1	1	0	1	0	0	0	0	0	1	1	0
TEAD1	5	0	0	1	1	1	0	0	1	0	1	0	0	0
TEX2	5	0	0	1	0	1	0	1	1	1	0	0	0	0
TFRC	5	1	0	0	0	1	0	1	1	0	0	0	0	1
TGFA	5	0	0	1	0	1	0	0	1	0	1	0	0	1
TGFBR3	5	1	0	0	0	0	0	0	1	0	1	0	1	1
THAP2	5	1	0	0	0	1	0	0	1	0	0	1	1	0
THBS1	5	1	0	0	1	0	0	0	1	0	1	0	1	0
TIAM1	5	0	1	0	0	1	0	1	0	0	0	1	1	0
TLR4	5	1	1	0	1	0	0	0	1	0	0	0	0	1
TMCC1	5	0	1	1	0	1	0	1	0	0	1	0	0	0
TMEM132B	5	0	1	0	1	1	0	0	0	1	1	0	0	0
TMEM19	5	0	1	0	1	0	1	0	0	1	1	0	0	0
TMEM245	5	0	1	1	0	1	0	0	1	0	0	0	0	1
TMEM9B	5	0	1	1	0	1	0	1	0	0	1	0	0	0
TMOD3	5	0	1	1	0	1	0	0	0	0	0	1	1	0
TMPO	5	0	1	0	0	1	1	1	1	0	0	0	0	0
TNFAIP1	5	1	1	0	0	1	0	0	0	0	0	1	1	0
TRIM44	5	0	0	0	0	1	0	0	1	0	1	1	0	1
TRIM65	5	1	1	0	0	0	1	1	0	1	0	0	0	0
TRIM66	5	1	0	0	1	0	0	1	0	1	0	0	0	1
TRIM71	5	1	0	1	0	1	0	0	0	1	1	0	0	0
TRIP12	5	1	1	0	0	1	0	1	1	0	0	0	0	0
TSPAN14	5	0	0	1	0	0	0	0	0	1	0	1	1	1
TTBK2	5	0	1	1	0	1	0	1	0	0	1	0	0	0
TTC9	5	0	1	0	0	0	0	1	1	0	0	1	1	0
TTLL7	5	1	0	0	0	0	0	0	1	1	0	1	1	0
TTYH3	5	0	0	1	0	0	0	1	0	1	0	1	1	0
TXLNA	5	1	1	0	0	0	0	1	0	0	1	0	0	1
UBE2D1	5	0	1	0	0	1	1	0	1	0	1	0	0	0
UBE2H	5	0	0	0	0	0	0	1	1	0	0	1	1	1
UBE4A	5	1	0	1	0	0	0	1	1	0	1	0	0	0
UBTD2	5	1	0	0	1	0	0	0	1	0	0	1	1	0
UBXN7	5	0	1	0	0	1	0	1	0	0	1	0	1	0
UNKL	5	1	1	0	0	1	1	0	0	0	1	0	0	0
USP13	5	1	0	1	0	1	0	0	0	1	0	0	0	1
USP15	5	1	1	1	0	0	0	0	0	0	1	0	0	1
USP46	5	1	1	0	0	0	0	1	1	0	1	0	0	0
USP54	5	1	1	0	1	0	1	0	0	1	0	0	0	0
USP6	5	1	1	1	1	1	0	0	0	0	0	0	0	0
USP6NL	5	0	0	0	0	0	0	0	1	0	1	1	1	1
VAV2	5	1	1	1	0	1	0	0	0	0	1	0	0	0
VPS13D	5	0	1	1	0	0	0	1	0	0	0	1	1	0
VPS36	5	1	0	0	0	0	0	0	0	1	0	1	1	1
VPS37B	5	0	0	1	0	1	0	0	0	0	1	0	1	1
WAC	5	1	1	0	0	1	0	0	1	0	1	0	0	0
WBP1L	5	0	0	0	0	0	1	0	0	1	1	1	1	0
WDFY1	5	0	0	1	0	0	0	0	0	1	1	1	1	0
WDR26	5	1	1	0	0	0	0	1	0	0	0	1	1	0
WDR31	5	0	0	1	0	0	0	1	1	0	1	0	0	1
WDR36	5	0	1	1	1	1	0	0	0	1	0	0	0	0
WDR37	5	1	1	0	0	0	0	0	1	1	1	0	0	0
WWTR1	5	1	0	0	0	0	0	1	0	1	0	1	1	0
XIAP	5	0	1	1	0	0	1	0	1	1	0	0	0	0
XPO4	5	1	0	0	1	1	0	0	0	1	0	0	1	0
XPO5	5	1	1	0	0	0	0	0	0	1	0	0	1	1
YAP1	5	1	0	0	1	0	0	1	0	0	1	0	0	1
YTHDF1	5	0	1	0	0	0	0	0	1	1	0	1	1	0
YWHAZ	5	1	1	0	0	0	0	1	0	1	0	0	0	1
ZBTB33	5	0	1	1	0	0	1	0	1	0	1	0	0	0
ZBTB37	5	1	1	0	0	0	0	0	0	1	1	1	0	0
ZBTB39	5	1	1	0	0	0	0	1	0	0	1	0	0	1
ZBTB41	5	1	1	0	0	0	0	0	0	0	1	1	1	0
ZBTB43	5	0	1	0	0	0	0	1	1	0	1	0	0	1
ZBTB44	5	1	0	0	0	1	0	0	1	1	1	0	0	0
ZBTB8B	5	1	1	0	0	0	1	0	0	1	1	0	0	0
ZC3H6	5	1	0	0	0	0	1	0	1	1	1	0	0	0
ZDHHC17	5	0	1	0	1	1	0	0	1	0	1	0	0	0
ZDHHC21	5	1	1	0	0	0	0	0	1	0	0	1	1	0
ZDHHC3	5	1	0	0	1	0	0	0	1	1	1	0	0	0
ZEB1	5	1	0	1	0	0	0	1	1	0	1	0	0	0
ZIC5	5	0	0	1	0	1	1	0	1	0	1	0	0	0
ZMIZ1	5	0	0	0	1	0	0	0	1	1	0	1	1	0
ZMYND11	5	1	0	0	0	0	1	0	1	0	1	0	0	1
ZNF230	5	0	0	0	0	0	1	0	1	0	1	1	1	0
ZNF250	5	0	0	1	0	0	0	1	1	0	0	1	0	1
ZNF260	5	1	0	0	1	0	0	0	1	1	0	0	0	1
ZNF275	5	1	0	0	1	0	0	1	1	0	1	0	0	0
ZNF28	5	1	1	0	0	0	0	0	1	0	0	1	1	0
ZNF292	5	1	1	0	1	0	0	0	1	1	0	0	0	0
ZNF431	5	0	1	1	0	0	0	1	1	0	1	0	0	0
ZNF460	5	1	0	1	0	0	1	1	0	0	1	0	0	0
ZNF577	5	1	1	0	0	0	0	0	0	0	1	1	1	0
ZNF618	5	1	0	0	0	1	0	1	0	1	1	0	0	0
ZNF81	5	0	1	0	0	0	0	0	0	1	1	1	1	0
ZYG11B	5	1	1	0	1	0	0	1	1	0	0	0	0	0
ABCA1	4	0	1	1	0	1	0	0	0	0	1	0	0	0
ABCC3	4	0	0	0	0	0	1	0	0	1	1	0	1	0
ABCC5	4	1	0	1	0	1	0	0	1	0	0	0	0	0
ABCD2	4	0	1	1	0	1	0	0	0	0	0	0	0	1
ABCE1	4	0	0	1	0	0	0	0	0	1	0	1	1	0
ABHD13	4	1	1	0	0	1	0	1	0	0	0	0	0	0
ABI1	4	0	1	0	0	0	0	0	1	0	0	1	1	0
ABR	4	1	0	1	0	0	0	1	0	0	0	0	0	1
ACO1	4	0	0	0	0	0	0	1	1	0	0	1	1	0
ACVR1	4	1	0	1	0	1	0	0	0	0	1	0	0	0
ACVR1C	4	1	0	0	0	0	0	1	1	0	1	0	0	0
ADAMTS1	4	1	1	0	0	0	0	1	0	0	1	0	0	0
ADAMTS19	4	0	0	0	0	1	0	0	1	0	0	1	1	0
ADCY6	4	0	0	0	0	0	0	1	1	0	1	0	0	1
ADD1	4	0	1	0	1	0	0	0	0	1	1	0	0	0
ADD2	4	0	0	0	1	1	0	0	0	1	0	0	0	1
ADNP2	4	0	0	1	0	1	0	0	0	0	0	1	1	0
AFAP1L1	4	0	0	0	0	0	1	0	0	1	0	1	1	0
AFF2	4	1	1	0	0	0	0	0	1	1	0	0	0	0
AGPAT4	4	0	0	0	0	0	0	0	1	0	0	1	1	1
AGPAT5	4	0	0	0	0	0	1	1	0	0	0	1	1	0
AGRN	4	1	0	1	0	0	0	0	0	1	1	0	0	0
AHCTF1	4	1	1	0	0	0	0	0	1	0	1	0	0	0
AHR	4	1	0	0	0	1	0	0	1	0	0	0	1	0
AKAP5	4	0	1	0	0	0	0	0	0	1	0	1	1	0
AKIRIN1	4	1	0	1	0	0	0	0	1	0	1	0	0	0
ALDH1L2	4	1	0	0	0	0	0	0	1	1	1	0	0	0
ALDH5A1	4	1	0	0	0	0	1	0	0	1	1	0	0	0
ALG10B	4	1	0	0	1	0	1	0	0	1	0	0	0	0
AMMECR1	4	0	0	1	0	1	1	0	0	0	1	0	0	0
AMOT	4	1	0	0	0	0	0	1	0	0	0	1	1	0
ANK3	4	0	0	0	0	1	0	0	0	0	1	1	1	0
ANKIB1	4	0	1	1	0	0	0	0	1	0	1	0	0	0
ANKRD13A	4	0	0	0	0	0	1	1	0	0	0	1	1	0
ANKRD17	4	0	1	0	0	0	0	1	1	0	1	0	0	0
ANP32A	4	0	0	0	1	1	0	0	1	1	0	0	0	0
ANP32E	4	1	0	0	0	0	0	1	0	0	1	0	0	1
AP2B1	4	0	1	1	0	0	0	1	0	1	0	0	0	0
AP4S1	4	1	1	0	0	0	0	0	0	1	1	0	0	0
APBB2	4	1	1	0	0	0	0	1	0	1	0	0	0	0
APOL6	4	0	0	1	1	1	1	0	0	0	0	0	0	0
APOOL	4	0	0	0	0	0	0	0	0	1	1	1	1	0
ARCN1	4	1	1	0	0	1	0	0	0	0	0	0	0	1
ARFGEF1	4	0	0	1	0	1	1	0	0	0	1	0	0	0
ARFIP1	4	0	0	1	0	1	0	1	1	0	0	0	0	0
ARHGAP20	4	0	1	0	0	1	0	0	1	1	0	0	0	0
ARHGAP29	4	1	0	1	0	0	1	0	1	0	0	0	0	0
ARHGEF10	4	0	1	0	0	0	1	0	0	0	0	1	1	0
ARHGEF26	4	0	0	1	0	0	1	1	0	0	1	0	0	0
ARL17A	4	0	0	0	1	0	0	0	0	1	0	1	1	0
ARL6IP1	4	0	0	1	0	1	0	0	1	0	1	0	0	0
ARMC8	4	1	1	0	0	0	0	0	1	0	1	0	0	0
ATF3	4	0	0	0	0	0	0	1	0	1	1	0	0	1
ATF6	4	0	1	0	0	0	0	1	1	0	0	0	0	1
ATG12	4	1	0	0	0	0	0	0	1	1	0	0	0	1
ATG2A	4	0	1	1	0	0	1	0	0	0	1	0	0	0
ATG9A	4	1	0	0	1	0	0	0	0	0	0	1	1	0
ATP1B1	4	0	0	0	0	0	1	0	0	1	0	1	1	0
ATP6V1B2	4	1	1	1	0	0	0	0	1	0	0	0	0	0
ATP8A2	4	0	0	0	0	0	0	1	1	1	1	0	0	0
ATRN	4	0	0	0	0	0	0	0	1	0	0	1	1	1
ATXN3	4	0	1	0	0	0	0	0	0	0	1	1	1	0
ATXN7	4	1	0	0	0	0	1	1	1	0	0	0	0	0
ATXN7L3	4	1	0	0	0	0	0	1	1	1	0	0	0	0
B4GALT1	4	0	0	0	0	0	0	0	1	1	0	0	1	1
BAHD1	4	1	1	1	0	0	0	1	0	0	0	0	0	0
BAZ2A	4	0	0	1	0	1	0	0	1	0	1	0	0	0
BICC1	4	0	1	1	0	1	0	0	0	0	1	0	0	0
BMPR1A	4	1	0	0	1	0	0	0	0	0	1	0	1	0
BMPR1B	4	0	0	1	0	1	0	1	0	1	0	0	0	0
BMT2	4	0	1	0	0	1	0	0	0	0	0	1	1	0
BNIP3L	4	1	0	0	0	0	0	0	1	1	1	0	0	0
BTBD10	4	0	1	1	0	1	0	1	0	0	0	0	0	0
BTN3A1	4	0	1	0	0	1	0	0	1	1	0	0	0	0
C18orf25	4	0	0	0	1	1	0	0	1	0	1	0	0	0
C19orf25	4	0	0	1	0	0	0	0	0	1	1	0	0	1
C2orf49	4	0	1	1	0	0	1	0	0	0	0	0	0	1
C5orf15	4	0	0	0	0	0	0	0	1	1	0	1	1	0
CAB39L	4	0	0	0	0	1	1	0	1	0	1	0	0	0
CADM1	4	0	0	0	0	0	1	1	0	0	1	0	0	1
CAMK1D	4	0	0	0	0	0	0	0	0	1	1	1	1	0
CAMK2B	4	0	0	0	0	0	0	1	1	1	0	1	0	0
CAMK2N1	4	0	1	0	0	0	0	1	1	0	0	0	0	1
CANT1	4	1	1	0	0	0	0	0	1	0	1	0	0	0
CANX	4	0	0	1	0	1	0	0	1	0	1	0	0	0
CASP3	4	1	0	0	0	0	0	0	1	0	0	1	1	0
CASP8	4	0	1	1	0	0	0	0	0	0	0	1	1	0
CASZ1	4	0	0	0	0	1	0	1	0	0	0	1	1	0
CAV1	4	0	1	0	0	0	1	0	0	1	1	0	0	0
CBX1	4	0	1	0	0	0	0	0	0	0	1	1	1	0
CCDC117	4	0	0	0	1	0	0	0	0	1	0	1	1	0
CCDC125	4	0	1	1	0	0	0	0	0	1	0	0	0	1
CCDC141	4	1	1	0	0	1	0	0	0	0	0	0	0	1
CCDC71L	4	1	1	1	0	0	0	0	1	0	0	0	0	0
CCNG2	4	1	1	0	0	0	0	1	0	1	0	0	0	0
CCNL2	4	0	0	0	0	0	0	1	0	0	1	1	1	0
CCPG1	4	1	0	0	0	0	0	0	1	1	1	0	0	0
CD276	4	1	0	0	1	0	0	0	0	0	0	1	1	0
CD302	4	0	0	0	0	0	0	1	1	0	1	0	0	1
CD93	4	0	0	0	0	0	1	0	1	0	0	1	1	0
CDC37L1	4	0	1	1	1	0	0	0	0	0	0	0	1	0
CDC5L	4	1	1	1	0	0	0	1	0	0	0	0	0	0
CDC73	4	0	1	0	1	0	0	0	1	1	0	0	0	0
CDH8	4	1	1	0	0	0	1	0	0	0	1	0	0	0
CDK12	4	0	0	0	1	0	1	0	0	1	0	0	0	1
CDK13	4	0	1	0	0	0	0	1	1	0	0	0	1	0
CDK16	4	1	0	0	0	0	0	0	0	1	0	1	1	0
CEBPG	4	0	0	1	0	1	0	1	0	0	1	0	0	0
CEP120	4	1	1	1	0	0	0	0	0	0	1	0	0	0
CEP128	4	0	1	0	0	1	1	0	0	0	1	0	0	0
CEP55	4	1	0	1	0	1	1	0	0	0	0	0	0	0
CEP68	4	0	0	1	0	0	0	1	0	0	0	1	1	0
CEP85L	4	0	0	0	0	1	1	0	1	0	1	0	0	0
CEP97	4	0	1	0	0	0	0	0	1	0	0	1	1	0
CERS6	4	0	1	0	0	1	1	0	0	0	1	0	0	0
CHD2	4	0	1	0	0	0	0	0	1	1	1	0	0	0
CHD4	4	1	1	0	0	1	0	0	0	0	1	0	0	0
CHFR	4	0	0	0	0	1	0	0	0	1	0	1	1	0
CHM	4	0	1	1	0	0	1	0	0	1	0	0	0	0
CHML	4	0	0	0	1	0	0	0	1	0	1	0	0	1
CHST11	4	0	0	0	0	0	0	1	1	1	0	0	0	1
CHUK	4	1	0	1	0	1	0	0	1	0	0	0	0	0
CKAP4	4	0	1	0	0	0	1	0	1	0	1	0	0	0
CLCN3	4	0	0	1	0	1	0	0	1	1	0	0	0	0
CLDN1	4	1	0	0	0	0	0	1	0	0	0	1	1	0
CLN8	4	1	0	0	0	0	0	0	1	1	1	0	0	0
CLSTN1	4	0	1	0	0	0	1	1	0	1	0	0	0	0
CMTM4	4	0	1	0	0	0	0	0	1	1	1	0	0	0
CNTLN	4	0	0	1	0	0	0	0	1	0	1	0	0	1
CNTNAP2	4	1	1	0	0	0	0	0	0	1	1	0	0	0
CNTNAP3	4	0	1	1	0	0	1	1	0	0	0	0	0	0
CNTNAP3B	4	0	1	1	0	1	0	1	0	0	0	0	0	0
COL15A1	4	1	0	0	0	0	0	0	1	0	0	1	1	0
COL1A1	4	1	0	1	0	0	0	0	0	0	0	1	1	0
COL27A1	4	1	0	0	0	0	0	0	0	0	1	1	1	0
COL4A3	4	0	1	0	0	0	0	0	0	0	1	1	1	0
COL4A4	4	1	0	0	0	0	0	0	1	0	0	1	1	0
COL4A6	4	1	0	0	0	0	0	0	0	1	0	1	1	0
COL6A3	4	0	0	1	0	1	0	0	0	0	0	1	1	0
COL9A1	4	1	0	0	1	0	0	0	0	0	0	1	1	0
COLEC10	4	0	0	0	1	1	0	0	0	0	1	0	1	0
COMMD2	4	1	0	0	0	0	0	0	0	0	1	1	1	0
CPEB2	4	1	0	1	0	0	0	0	1	0	1	0	0	0
CPNE8	4	0	0	0	0	0	0	0	1	0	1	1	1	0
CPOX	4	1	1	1	0	0	0	0	1	0	0	0	0	0
CPS1	4	0	1	0	0	0	0	0	0	1	0	1	1	0
CREBBP	4	0	0	0	0	0	0	1	1	1	0	0	0	1
CRIM1	4	0	1	1	0	1	0	0	1	0	0	0	0	0
CRIPT	4	1	1	0	0	0	0	0	1	1	0	0	0	0
CRISPLD1	4	0	0	1	0	0	0	0	1	0	0	1	1	0
CRK	4	1	1	0	1	0	1	0	0	0	0	0	0	0
CRLS1	4	0	0	1	0	0	0	1	1	0	0	0	0	1
CRY2	4	1	1	0	0	0	0	0	0	1	1	0	0	0
CSDE1	4	0	1	1	0	0	0	1	1	0	0	0	0	0
CSF1	4	0	1	1	0	1	0	0	0	0	1	0	0	0
CTIF	4	0	1	0	0	0	0	1	1	0	1	0	0	0
CYB561D1	4	1	1	0	0	0	0	0	0	1	0	0	0	1
CYLD	4	0	1	1	0	0	0	1	1	0	0	0	0	0
CYP20A1	4	0	1	1	0	0	0	0	0	1	0	0	0	1
CYP26B1	4	0	1	0	0	1	0	1	0	0	0	0	0	1
CYP2U1	4	1	1	1	0	0	0	1	0	0	0	0	0	0
CYTH3	4	1	0	0	0	1	0	1	0	1	0	0	0	0
DAAM1	4	0	0	1	0	0	0	0	0	0	1	1	1	0
DAZAP2	4	0	1	0	0	1	0	0	0	0	1	0	0	1
DCAF10	4	0	1	1	0	0	0	1	0	1	0	0	0	0
DCAF17	4	1	0	0	1	0	0	1	0	0	1	0	0	0
DCAF8	4	0	1	1	0	0	1	1	0	0	0	0	0	0
DCLRE1B	4	0	0	0	1	0	0	1	0	1	0	0	0	1
DCUN1D3	4	1	1	1	0	1	0	0	0	0	0	0	0	0
DDHD2	4	0	1	0	0	1	1	0	0	1	0	0	0	0
DDX17	4	0	1	1	0	0	0	1	0	0	1	0	0	0
DENND1B	4	1	0	0	0	1	0	1	0	0	1	0	0	0
DGKD	4	0	1	0	0	0	0	0	1	0	0	1	1	0
DHFR	4	1	0	0	0	0	1	0	0	1	0	0	0	1
DHTKD1	4	1	0	0	0	0	0	0	1	1	1	0	0	0
DIAPH2	4	1	0	0	0	0	1	0	0	0	0	1	1	0
DIS3	4	1	1	0	0	0	0	0	1	0	1	0	0	0
DLL1	4	0	0	1	1	0	0	0	1	1	0	0	0	0
DNAJB9	4	1	1	1	0	0	0	0	0	0	1	0	0	0
DNAJC16	4	0	1	1	0	0	0	0	1	1	0	0	0	0
DNAJC27	4	1	1	0	0	0	0	1	0	0	1	0	0	0
DNM2	4	0	1	1	0	0	0	0	0	1	0	0	0	1
DOCK3	4	1	0	1	0	0	0	0	1	1	0	0	0	0
DR1	4	0	0	0	1	1	0	0	0	0	0	1	1	0
DSTYK	4	0	1	1	0	1	1	0	0	0	0	0	0	0
DUSP16	4	1	0	0	0	0	1	0	1	1	0	0	0	0
DUSP2	4	1	1	0	0	0	0	0	0	0	0	1	1	0
DUSP4	4	1	0	0	0	0	1	1	0	0	0	0	1	0
DUSP7	4	1	0	0	0	0	0	0	0	1	1	0	0	1
E2F3	4	1	1	0	0	1	0	0	0	1	0	0	0	0
E2F5	4	1	1	0	0	0	1	0	0	0	0	0	0	1
EBF1	4	1	1	0	0	0	0	0	1	0	0	0	0	1
EBF3	4	0	1	1	0	0	0	0	1	0	1	0	0	0
EDA	4	1	0	1	0	0	0	1	0	1	0	0	0	0
EDC3	4	0	0	0	0	0	0	1	0	1	0	1	1	0
EEA1	4	1	1	0	0	0	1	0	1	0	0	0	0	0
EEF1A1	4	1	1	0	0	0	0	0	0	1	1	0	0	0
EFTUD2	4	1	0	0	0	0	0	0	0	0	0	1	1	1
EGLN3	4	1	1	1	0	0	0	0	1	0	0	0	0	0
EHD2	4	1	0	0	0	0	0	0	0	1	0	1	1	0
EHF	4	1	0	0	0	0	0	0	1	1	1	0	0	0
EIF2S1	4	0	1	0	0	0	1	0	0	0	0	1	1	0
EIF2S2	4	1	0	0	0	0	0	0	0	0	1	1	1	0
EIF4E3	4	0	0	0	0	1	0	1	1	1	0	0	0	0
EIF5	4	0	0	1	0	1	0	0	0	1	1	0	0	0
ELAVL2	4	0	1	0	0	1	0	0	1	0	1	0	0	0
ELF2	4	0	0	0	0	0	0	1	1	0	0	1	1	0
ELOVL6	4	0	1	0	0	0	0	1	1	1	0	0	0	0
EMB	4	1	0	0	0	0	1	0	0	0	1	0	0	1
EML4	4	0	0	0	0	0	0	0	1	1	0	1	1	0
ENC1	4	0	0	1	0	0	1	0	1	0	1	0	0	0
ENDOD1	4	0	0	1	1	0	1	0	0	0	0	0	0	1
ENPP4	4	0	1	1	0	0	1	0	1	0	0	0	0	0
ENTPD5	4	0	1	0	1	0	1	0	1	0	0	0	0	0
EP300	4	0	1	1	0	1	0	1	0	0	0	0	0	0
EPB41L1	4	1	0	0	0	0	0	0	0	1	1	0	1	0
EPC1	4	0	0	1	0	0	0	1	0	0	0	1	1	0
EPDR1	4	0	0	0	0	1	1	0	1	0	1	0	0	0
ERAP1	4	0	1	0	0	0	0	0	0	0	0	1	1	1
ERGIC1	4	1	0	0	0	0	0	0	1	1	0	0	0	1
ERLIN1	4	1	0	0	1	1	0	0	0	0	1	0	0	0
ERMP1	4	1	0	1	0	1	1	0	0	0	0	0	0	0
ESRP2	4	1	0	1	0	1	0	0	0	1	0	0	0	0
ETNK1	4	1	0	0	0	1	0	0	1	0	1	0	0	0
EYA3	4	1	0	0	0	1	0	1	0	1	0	0	0	0
F11R	4	0	1	0	0	0	0	0	0	0	1	1	1	0
FAM102A	4	0	1	0	0	0	0	1	0	0	1	0	0	1
FAM102B	4	0	0	0	0	1	0	0	1	0	0	1	1	0
FAM120C	4	1	0	0	0	0	0	0	0	1	1	0	0	1
FAM13A	4	0	1	0	0	0	0	1	1	0	1	0	0	0
FAM204A	4	0	1	0	1	0	0	1	0	1	0	0	0	0
FAM222B	4	1	1	0	0	0	0	0	1	0	1	0	0	0
FAM3C	4	0	1	0	0	0	1	0	0	0	0	1	1	0
FBN2	4	0	0	0	0	0	0	1	1	0	0	1	1	0
FBXL19	4	1	0	0	0	1	0	1	0	1	0	0	0	0
FBXO36	4	0	0	0	0	0	1	0	1	1	1	0	0	0
FBXO41	4	0	0	0	0	0	0	1	0	1	0	1	1	0
FER	4	0	1	0	0	0	0	0	1	0	0	1	1	0
FGF5	4	1	1	0	0	0	0	0	1	0	1	0	0	0
FHDC1	4	0	1	0	0	0	1	0	0	1	1	0	0	0
FKBP4	4	0	0	0	0	0	0	0	1	0	0	1	1	1
FNBP1	4	0	1	0	0	0	1	1	0	0	1	0	0	0
FNBP1L	4	0	1	0	0	0	0	1	1	0	1	0	0	0
FNDC3A	4	1	1	0	0	1	0	0	0	0	1	0	0	0
FOXA1	4	0	1	1	0	0	1	0	1	0	0	0	0	0
FOXJ3	4	0	1	0	0	0	0	0	1	1	1	0	0	0
FOXK2	4	0	1	1	0	1	0	0	0	0	1	0	0	0
FOXO4	4	0	0	0	0	0	0	0	1	1	0	1	1	0
FOXQ1	4	0	1	1	0	0	0	0	0	1	0	0	0	1
FOXRED2	4	1	1	0	0	0	0	0	0	1	0	0	0	1
FRAT2	4	0	0	0	0	0	0	1	1	0	0	1	1	0
FREM1	4	0	0	0	0	0	0	0	1	0	0	1	1	1
FREM2	4	1	0	0	0	0	0	0	0	1	0	1	1	0
FRMD4A	4	0	1	0	1	0	0	0	0	0	0	1	1	0
FRMD6	4	0	1	1	0	0	0	1	0	0	1	0	0	0
FRYL	4	0	0	0	1	1	0	0	0	0	1	0	0	1
FSCN1	4	0	0	0	0	1	0	0	0	1	0	1	1	0
FTO	4	1	0	0	0	1	0	0	0	1	0	0	0	1
FURIN	4	0	1	0	0	1	0	1	0	1	0	0	0	0
FUT9	4	0	0	1	0	0	0	1	1	1	0	0	0	0
GAB2	4	1	0	0	0	0	1	0	0	1	1	0	0	0
GABPB1	4	0	1	0	0	1	1	1	0	0	0	0	0	0
GABRP	4	0	0	0	0	0	0	0	0	1	1	1	1	0
GDF11	4	1	1	0	0	0	1	0	0	1	0	0	0	0
GFRA1	4	0	0	0	1	0	0	1	0	1	1	0	0	0
GIGYF2	4	0	0	0	0	0	0	1	0	0	1	1	1	0
GINS1	4	0	1	1	1	0	0	0	0	1	0	0	0	0
GIT2	4	1	1	0	0	0	0	0	0	0	0	1	1	0
GK5	4	1	1	0	0	0	0	0	0	1	1	0	0	0
GLYR1	4	1	0	0	0	1	0	0	1	1	0	0	0	0
GNAI1	4	1	0	0	0	1	0	0	1	0	0	0	0	1
GNAI3	4	1	1	0	0	0	0	1	1	0	0	0	0	0
GNB5	4	0	1	1	0	1	0	1	0	0	0	0	0	0
GOLGA8B	4	0	1	1	0	0	0	0	1	0	1	0	0	0
GPATCH8	4	1	0	0	0	1	0	1	0	1	0	0	0	0
GPM6B	4	0	0	0	1	0	0	0	1	1	0	0	0	1
GPR107	4	0	0	0	0	1	0	1	0	0	1	0	1	0
GPR156	4	1	0	0	0	0	0	0	0	0	1	1	0	1
GPR26	4	1	1	0	1	0	0	0	0	0	1	0	0	0
GPR37	4	0	0	0	0	0	1	0	1	0	0	1	1	0
GPRC5A	4	0	0	1	0	1	0	0	0	1	0	0	0	1
GPT2	4	0	0	1	0	0	0	1	0	0	1	0	1	0
GRAP2	4	0	0	0	1	0	0	0	1	0	0	1	1	0
GRB2	4	0	0	0	0	1	0	1	0	0	1	0	0	1
GREB1	4	1	1	0	0	0	0	1	0	1	0	0	0	0
GREM1	4	1	0	0	0	0	0	0	1	0	1	0	0	1
GRM5	4	0	0	0	0	0	0	1	1	0	1	0	0	1
GRPEL2	4	1	1	0	0	0	0	0	1	1	0	0	0	0
GTDC1	4	0	1	0	0	0	0	1	1	1	0	0	0	0
GTF2A1	4	0	1	0	0	0	0	0	1	1	1	0	0	0
GTF2H5	4	0	1	0	0	0	1	1	0	0	1	0	0	0
GUCY1A2	4	0	1	0	0	0	1	0	1	0	0	0	0	1
HAPLN1	4	0	0	0	0	0	0	0	1	0	1	1	1	0
HBP1	4	0	1	1	0	0	0	0	0	0	0	1	1	0
HBS1L	4	0	0	0	0	1	1	0	1	1	0	0	0	0
HCN4	4	0	1	0	0	0	1	0	0	0	1	0	0	1
HDAC2	4	1	0	0	0	0	0	0	1	1	0	0	0	1
HDLBP	4	1	0	0	0	0	1	1	0	0	0	0	0	1
HDX	4	1	0	0	1	0	0	0	1	0	1	0	0	0
HECA	4	0	1	1	1	0	0	1	0	0	0	0	0	0
HIF3A	4	1	0	0	1	0	0	0	0	0	0	1	1	0
HINT3	4	0	0	0	0	0	1	0	0	0	1	1	1	0
HK2	4	1	0	1	0	1	0	0	0	1	0	0	0	0
HLA-C	4	0	0	1	1	1	0	0	1	0	0	0	0	0
HLF	4	0	1	0	0	0	0	0	0	1	0	1	1	0
HMBOX1	4	0	1	0	1	0	0	0	0	0	1	0	0	1
HMGCR	4	0	0	0	0	0	0	0	1	0	1	1	1	0
HNRNPU	4	0	0	0	1	0	0	0	1	0	1	0	0	1
HSPA12A	4	0	0	0	0	0	0	1	1	1	0	0	0	1
HYOU1	4	1	0	0	1	0	0	0	0	1	1	0	0	0
ICA1L	4	0	1	1	0	0	0	1	0	1	0	0	0	0
ICOS	4	1	0	0	0	0	0	0	0	0	1	1	1	0
IDE	4	1	0	0	0	0	0	0	0	0	0	1	1	1
IDS	4	1	0	0	0	0	0	0	1	1	1	0	0	0
IFFO2	4	0	0	0	0	0	0	1	0	1	0	1	1	0
IFI44L	4	1	1	0	0	0	0	0	1	0	1	0	0	0
IFNAR1	4	0	1	0	0	0	0	0	0	1	1	0	0	1
IFNAR2	4	0	1	1	0	0	0	0	0	0	1	0	0	1
IGF1	4	0	0	1	0	1	0	0	0	0	0	1	1	0
IGF2R	4	0	0	1	0	0	1	1	0	1	0	0	0	0
IL13RA1	4	0	0	1	1	1	0	1	0	0	0	0	0	0
IL1RAP	4	0	1	1	1	0	1	0	0	0	0	0	0	0
IL21R	4	0	0	0	0	0	0	0	1	1	1	0	0	1
IL6R	4	1	0	0	0	0	1	1	1	0	0	0	0	0
IMPDH1	4	1	0	1	0	0	0	0	0	0	0	1	1	0
INHBA	4	0	1	1	0	0	1	0	0	0	0	0	1	0
INIP	4	1	1	0	0	0	1	0	0	0	1	0	0	0
INO80	4	0	1	1	0	1	0	1	0	0	0	0	0	0
INPP4B	4	0	1	0	1	0	0	0	0	1	1	0	0	0
IPMK	4	0	1	1	0	0	0	0	1	0	1	0	0	0
IPO5	4	0	1	0	0	1	0	0	1	0	1	0	0	0
IPO7	4	1	1	0	0	1	0	1	0	0	0	0	0	0
IQSEC1	4	0	1	0	0	1	0	0	1	0	0	0	0	1
IRAK4	4	0	1	0	0	0	1	0	0	1	1	0	0	0
ISOC1	4	0	1	0	0	0	0	0	1	0	0	1	1	0
ITCH	4	0	1	0	1	0	0	1	0	0	1	0	0	0
ITGA11	4	0	0	0	0	1	0	0	0	0	0	1	1	1
ITPKB	4	0	1	1	0	0	0	0	0	1	1	0	0	0
IYD	4	0	1	0	1	0	0	0	0	1	0	0	0	1
JOSD1	4	0	1	0	0	0	0	0	0	0	1	1	1	0
KANSL1	4	0	1	1	0	1	0	1	0	0	0	0	0	0
KAT6A	4	0	1	0	0	1	0	1	0	1	0	0	0	0
KCNB1	4	0	1	1	0	0	0	0	0	1	0	1	0	0
KCNJ10	4	1	1	1	0	0	0	0	0	0	1	0	0	0
KCNJ3	4	1	0	0	0	0	1	0	0	1	1	0	0	0
KCNK10	4	0	0	1	0	0	0	1	0	0	0	1	1	0
KCNK2	4	0	1	0	1	0	0	0	0	1	1	0	0	0
KCNQ3	4	0	1	0	0	1	0	0	0	1	1	0	0	0
KCTD15	4	0	0	0	1	0	1	0	0	0	0	1	1	0
KCTD2	4	0	0	0	0	1	0	1	0	1	1	0	0	0
KCTD3	4	0	0	0	1	0	0	0	1	0	0	1	1	0
KDM2B	4	1	0	1	1	1	0	0	0	0	0	0	0	0
KDM4B	4	0	0	0	0	0	0	0	0	0	1	1	1	1
KIAA0232	4	0	1	1	0	1	0	1	0	0	0	0	0	0
KIF14	4	0	1	1	0	1	1	0	0	0	0	0	0	0
KIF21B	4	1	0	0	0	0	1	0	1	1	0	0	0	0
KIF5C	4	0	1	0	0	1	1	1	0	0	0	0	0	0
KLF10	4	0	1	0	0	0	1	0	1	0	0	0	0	1
KLF11	4	0	1	0	0	0	0	1	1	1	0	0	0	0
KLF13	4	0	0	1	1	0	0	0	1	1	0	0	0	0
KLF4	4	0	0	1	0	1	0	0	0	0	0	1	1	0
KLHDC3	4	0	0	0	0	0	0	0	0	1	1	1	1	0
KLHL28	4	0	1	0	0	0	0	0	1	0	0	1	1	0
KLHL3	4	0	0	1	0	0	0	1	0	1	0	0	0	1
KLHL8	4	0	1	0	0	0	1	0	0	0	0	1	1	0
L2HGDH	4	1	1	0	0	0	1	0	0	1	0	0	0	0
LAMTOR1	4	0	1	0	0	0	0	0	1	0	0	1	1	0
LBH	4	1	1	0	0	0	0	0	0	1	1	0	0	0
LEPROTL1	4	1	0	0	0	1	1	0	0	1	0	0	0	0
LFNG	4	0	0	0	1	0	0	0	0	1	1	0	0	1
LGALS8	4	0	1	1	0	1	0	0	0	0	1	0	0	0
LHX6	4	0	1	0	0	1	0	1	0	1	0	0	0	0
LIMS1	4	0	0	0	0	0	1	0	0	1	0	1	1	0
LIN54	4	1	1	0	0	0	0	0	1	0	1	0	0	0
LIN7A	4	0	0	0	0	0	1	0	0	0	1	1	1	0
LIPT2	4	1	0	0	0	0	0	0	1	1	1	0	0	0
LMAN1	4	0	0	0	0	1	1	0	1	1	0	0	0	0
LONRF2	4	1	0	0	0	0	0	0	1	1	1	0	0	0
LOX	4	0	0	0	0	0	0	0	0	1	1	1	1	0
LPIN2	4	0	0	0	1	0	0	1	1	0	1	0	0	0
LRP12	4	0	1	1	0	0	0	1	1	0	0	0	0	0
LRP2	4	0	0	1	1	1	0	0	0	0	0	0	0	1
LRRC27	4	0	0	0	1	0	1	1	0	0	1	0	0	0
LY6G5B	4	0	1	0	0	1	0	0	0	1	1	0	0	0
LYSMD1	4	0	0	0	0	1	0	0	0	1	0	1	1	0
LYSMD3	4	0	1	0	0	1	1	0	0	0	1	0	0	0
MAFB	4	0	0	1	0	1	0	0	0	0	0	1	1	0
MAML1	4	0	0	1	0	0	0	1	1	1	0	0	0	0
MAP3K1	4	1	1	0	0	0	1	0	1	0	0	0	0	0
MAP4	4	1	0	0	0	0	0	1	1	1	0	0	0	0
MAP4K4	4	0	0	0	0	0	0	0	1	0	1	1	1	0
MAP9	4	0	1	0	0	0	0	1	1	0	0	0	0	1
MAPK14	4	0	0	0	0	0	0	1	1	1	1	0	0	0
MAPK1IP1L	4	1	1	0	1	0	0	0	1	0	0	0	0	0
MAPKBP1	4	0	0	1	0	0	0	0	0	1	0	1	1	0
MAPRE2	4	0	0	0	0	0	0	1	0	1	0	1	1	0
MAPT	4	0	1	0	0	0	0	1	0	1	0	0	0	1
MARK3	4	1	0	1	0	0	0	0	0	0	0	1	1	0
MBD2	4	1	1	1	0	0	0	0	0	0	1	0	0	0
MBNL1	4	0	1	1	0	0	0	1	1	0	0	0	0	0
MBOAT2	4	0	1	0	0	1	0	1	0	0	1	0	0	0
MBTD1	4	0	0	0	0	0	0	0	1	0	1	1	1	0
MCCC2	4	1	0	0	0	0	0	0	0	0	0	1	1	1
MCM4	4	1	1	0	0	0	0	0	1	1	0	0	0	0
MDFIC	4	0	0	1	1	1	0	0	1	0	0	0	0	0
MECP2	4	0	1	1	0	0	0	1	0	0	0	0	0	1
METTL9	4	1	0	0	0	0	1	0	1	0	1	0	0	0
MFN1	4	1	1	0	0	0	0	1	0	0	1	0	0	0
MIPOL1	4	0	0	1	0	0	1	0	1	1	0	0	0	0
MITF	4	0	0	0	0	1	0	0	1	1	1	0	0	0
MKNK2	4	0	1	0	0	0	1	0	0	1	1	0	0	0
MLLT10	4	1	0	1	0	1	0	0	1	0	0	0	0	0
MMGT1	4	0	0	1	1	0	0	0	1	0	1	0	0	0
MMP24	4	0	1	0	0	0	0	0	0	1	0	1	1	0
MNT	4	0	0	0	0	1	0	0	0	1	1	0	0	1
MOB4	4	1	0	0	0	1	0	1	0	0	0	0	1	0
MON1B	4	1	1	1	0	0	0	0	0	0	1	0	0	0
MPHOSPH9	4	1	0	1	0	0	0	1	0	0	1	0	0	0
MPRIP	4	0	1	0	0	1	0	1	0	0	1	0	0	0
MRPS25	4	1	0	0	0	1	0	0	0	1	1	0	0	0
MSMO1	4	1	1	1	0	0	0	0	1	0	0	0	0	0
MSRB3	4	0	0	0	0	0	1	1	0	1	1	0	0	0
MTHFD2	4	1	0	1	0	0	0	1	0	0	0	0	1	0
MTMR3	4	0	1	0	0	1	0	0	0	0	1	0	0	1
MTUS1	4	1	1	0	0	0	0	1	1	0	0	0	0	0
MYC	4	1	0	1	0	0	0	1	0	1	0	0	0	0
MYCN	4	1	1	0	0	0	0	0	0	0	0	1	1	0
MYLK	4	0	0	0	1	0	1	1	0	1	0	0	0	0
MYLK4	4	0	0	1	0	1	0	0	0	0	1	1	0	0
MYO5B	4	1	1	0	0	0	0	0	1	0	0	0	1	0
MYO6	4	1	0	0	1	0	0	1	1	0	0	0	0	0
MYSM1	4	0	0	1	0	1	0	0	1	0	1	0	0	0
N4BP2L1	4	0	0	0	0	0	0	0	1	0	1	1	1	0
NAA40	4	1	0	0	0	0	0	0	0	1	0	1	1	0
NAGA	4	1	0	1	0	0	0	1	0	0	0	0	0	1
NAIF1	4	0	1	0	1	0	0	0	1	1	0	0	0	0
NAPEPLD	4	1	1	0	0	0	0	0	1	1	0	0	0	0
NCBP1	4	0	0	1	0	1	1	0	1	0	0	0	0	0
NCEH1	4	0	1	1	0	0	1	0	0	1	0	0	0	0
NCKAP1	4	1	1	1	0	0	0	0	0	0	1	0	0	0
NCOA4	4	1	0	0	0	0	0	0	1	0	0	1	1	0
NCOA5	4	1	1	0	0	0	0	0	0	1	1	0	0	0
NCOA7	4	1	1	0	1	0	0	0	0	0	1	0	0	0
NDFIP2	4	0	0	0	0	0	1	0	1	0	1	0	0	1
NDRG4	4	0	0	0	0	0	0	0	1	1	0	1	1	0
NEDD4	4	1	0	0	0	0	0	1	1	0	1	0	0	0
NEDD4L	4	1	1	0	0	0	0	0	1	1	0	0	0	0
NEFM	4	1	0	0	0	0	0	1	0	1	0	0	1	0
NEK7	4	1	0	0	1	0	0	0	1	0	1	0	0	0
NETO2	4	0	1	0	0	0	0	0	1	1	0	1	0	0
NEURL1B	4	0	1	0	0	0	0	0	0	0	1	0	1	1
NEUROD1	4	0	0	1	0	1	0	0	0	1	0	0	0	1
NF1	4	0	0	1	0	0	0	0	1	1	1	0	0	0
NF2	4	0	0	1	1	0	0	1	0	1	0	0	0	0
NFYA	4	0	0	1	0	1	1	1	0	0	0	0	0	0
NIN	4	0	1	0	0	1	1	0	1	0	0	0	0	0
NKIRAS2	4	1	0	1	0	0	0	0	0	0	0	1	1	0
NKRF	4	0	0	0	0	0	1	0	1	0	0	1	1	0
NMI	4	0	0	1	0	1	0	0	0	0	0	1	1	0
NNT	4	1	1	0	0	0	0	0	1	0	0	1	0	0
NOL4	4	0	1	1	0	1	0	0	1	0	0	0	0	0
NOLC1	4	1	0	1	0	0	0	0	0	0	1	0	0	1
NONO	4	1	0	0	0	1	1	0	1	0	0	0	0	0
NOVA1	4	1	0	0	1	0	0	0	0	0	1	0	0	1
NOVA2	4	0	0	1	0	1	0	0	0	1	0	0	0	1
NPAT	4	0	1	1	0	1	0	0	0	1	0	0	0	0
NPNT	4	0	1	1	0	0	1	1	0	0	0	0	0	0
NR1D2	4	1	0	0	0	0	0	1	1	0	1	0	0	0
NR2C2	4	1	1	0	0	0	0	0	0	0	1	0	0	1
NRARP	4	1	0	1	0	1	0	0	0	0	1	0	0	0
NRIP1	4	0	0	0	0	0	1	0	1	1	1	0	0	0
NRIP3	4	1	1	0	0	0	0	0	0	0	1	0	0	1
NRP1	4	0	0	1	0	1	0	0	0	1	0	0	0	1
NSD2	4	0	0	0	0	1	1	0	1	1	0	0	0	0
NUAK1	4	1	0	0	0	0	1	0	1	1	0	0	0	0
OGFOD1	4	1	0	0	1	0	0	0	0	1	0	0	0	1
OGFRL1	4	0	0	0	0	0	1	0	0	0	1	1	1	0
OGT	4	0	0	0	0	1	0	0	1	1	1	0	0	0
OPHN1	4	0	1	1	0	0	0	0	1	0	1	0	0	0
ORAI2	4	0	1	0	1	0	0	1	0	1	0	0	0	0
OSBP	4	0	0	1	0	0	0	0	0	1	0	1	1	0
OSBPL10	4	1	0	0	0	0	1	0	0	1	1	0	0	0
OSBPL3	4	1	0	0	0	0	0	0	0	0	0	1	1	1
OSBPL8	4	0	1	0	0	0	1	0	1	0	1	0	0	0
OSM	4	1	1	0	0	0	0	1	0	0	0	1	0	0
OXSR1	4	0	0	0	0	1	0	1	1	1	0	0	0	0
PAFAH1B2	4	0	1	1	0	0	0	1	0	1	0	0	0	0
PAICS	4	0	0	0	1	0	0	0	1	1	0	0	0	1
PAQR3	4	0	1	1	0	0	0	0	0	1	0	0	0	1
PAX8	4	0	1	0	0	0	0	1	0	1	0	0	0	1
PCDH17	4	1	0	0	0	0	0	0	1	0	0	1	1	0
PCDHA1	4	0	1	0	0	0	0	1	0	0	0	1	1	0
PCDHA10	4	0	1	0	0	0	0	1	0	0	0	1	1	0
PCDHA11	4	0	1	0	0	0	0	1	0	0	0	1	1	0
PCDHA12	4	0	1	0	0	0	0	1	0	0	0	1	1	0
PCDHA13	4	0	1	0	0	0	0	1	0	0	0	1	1	0
PCDHA2	4	0	1	0	0	0	0	1	0	0	0	1	1	0
PCDHA3	4	0	1	0	0	0	0	1	0	0	0	1	1	0
PCDHA5	4	0	1	0	0	0	0	1	0	0	0	1	1	0
PCDHA6	4	0	1	0	0	0	0	1	0	0	0	1	1	0
PCDHA7	4	0	1	0	0	0	0	1	0	0	0	1	1	0
PCDHA8	4	0	1	0	0	0	0	1	0	0	0	1	1	0
PCDHA9	4	0	1	0	0	0	0	1	0	0	0	1	1	0
PCDHAC1	4	0	1	0	0	0	0	1	0	0	0	1	1	0
PCDHAC2	4	0	1	0	0	0	0	1	0	0	0	1	1	0
PCF11	4	0	0	0	0	0	0	0	1	1	0	0	1	1
PCNP	4	1	1	0	0	0	0	1	1	0	0	0	0	0
PCSK5	4	1	0	0	0	0	0	0	0	1	0	1	1	0
PDE3A	4	0	0	0	0	0	0	0	0	1	1	1	1	0
PDE4D	4	0	0	1	0	1	0	0	0	0	1	0	0	1
PDE5A	4	0	1	0	0	1	0	1	0	0	1	0	0	0
PDGFB	4	1	1	0	0	0	0	0	0	0	0	1	1	0
PDGFC	4	0	1	0	0	0	0	1	0	0	0	1	1	0
PDHA1	4	0	0	0	0	0	1	1	1	1	0	0	0	0
PDHX	4	1	0	0	0	0	0	0	0	0	1	1	1	0
PDK4	4	0	1	0	0	1	0	0	1	0	1	0	0	0
PDP2	4	1	0	1	0	0	0	0	1	1	0	0	0	0
PDPN	4	0	0	0	0	0	0	0	0	1	1	1	1	0
PDRG1	4	0	1	1	0	0	0	0	0	0	0	1	1	0
PDS5A	4	0	1	0	1	1	0	1	0	0	0	0	0	0
PEX26	4	0	0	0	0	0	0	0	1	1	0	1	1	0
PFKFB2	4	0	1	0	1	0	1	0	0	0	1	0	0	0
PFN2	4	0	1	1	0	0	0	1	0	0	0	0	0	1
PGK1	4	1	0	1	0	0	0	0	0	1	0	0	0	1
PHC2	4	0	0	0	0	0	1	1	0	1	1	0	0	0
PHEX	4	0	0	0	1	1	0	1	1	0	0	0	0	0
PHF12	4	0	1	1	0	0	0	1	0	0	1	0	0	0
PHF6	4	0	1	1	0	0	1	0	0	1	0	0	0	0
PHF8	4	1	0	1	0	0	0	1	0	1	0	0	0	0
PHTF2	4	0	1	0	1	0	1	0	1	0	0	0	0	0
PI4KA	4	0	0	1	0	1	0	0	0	0	0	1	1	0
PIK3C2A	4	0	0	1	0	1	0	1	1	0	0	0	0	0
PITPNA	4	0	1	0	0	0	0	1	1	0	1	0	0	0
PITPNC1	4	1	0	0	0	0	1	0	1	1	0	0	0	0
PKIA	4	0	1	0	0	0	0	0	1	1	1	0	0	0
PKN2	4	1	1	0	1	0	0	0	0	0	1	0	0	0
PLAU	4	0	0	0	0	1	1	0	1	0	1	0	0	0
PLCXD3	4	1	0	1	0	0	0	1	1	0	0	0	0	0
PLEKHO2	4	0	1	0	0	1	0	0	0	1	0	0	0	1
PLSCR4	4	1	1	1	1	0	0	0	0	0	0	0	0	0
PLXNA2	4	1	0	0	0	0	0	1	1	0	1	0	0	0
PMAIP1	4	1	1	0	1	0	0	0	0	0	1	0	0	0
PMEPA1	4	0	0	1	0	0	0	1	0	1	0	0	0	1
PMP22	4	0	1	0	0	0	0	0	0	1	0	1	1	0
PNISR	4	0	1	0	0	0	0	1	0	0	1	0	0	1
POFUT1	4	0	1	0	0	1	0	0	0	0	1	0	0	1
POLE3	4	0	1	0	0	0	0	0	0	1	0	1	1	0
POLQ	4	1	1	1	0	0	1	0	0	0	0	0	0	0
POLR1A	4	1	0	1	0	0	0	0	1	0	0	0	0	1
POLR1B	4	1	1	1	0	0	0	0	0	1	0	0	0	0
POLR3D	4	1	0	0	0	0	0	1	0	1	0	0	1	0
PPARD	4	0	1	0	0	1	0	0	0	1	0	1	0	0
PPIF	4	0	0	0	0	1	0	1	1	0	1	0	0	0
PPM1K	4	0	0	0	0	0	0	1	1	1	1	0	0	0
PPP1R13B	4	0	1	0	0	0	0	0	1	0	0	1	1	0
PPP1R14C	4	0	0	1	0	1	0	0	1	0	0	0	1	0
PPP1R3D	4	0	0	0	0	0	0	0	0	1	0	1	1	1
PPP2R2C	4	0	0	0	0	1	0	0	0	1	1	0	0	1
PPP2R5C	4	1	0	1	1	1	0	0	0	0	0	0	0	0
PPT1	4	0	0	0	0	0	0	1	1	0	1	0	1	0
PPTC7	4	1	1	1	0	0	0	0	0	1	0	0	0	0
PRDM11	4	1	0	0	0	0	0	1	0	0	0	1	1	0
PREX1	4	0	1	0	0	1	0	1	0	0	1	0	0	0
PRKAB2	4	1	1	0	0	0	0	0	0	0	0	1	1	0
PRKCB	4	1	1	0	0	0	0	0	1	0	1	0	0	0
PRMT6	4	1	0	0	0	0	0	0	0	1	0	1	1	0
PRR11	4	0	1	1	0	0	0	0	0	1	1	0	0	0
PRTG	4	1	0	0	0	1	0	0	1	0	1	0	0	0
PSD4	4	1	0	0	0	0	0	1	0	1	1	0	0	0
PSKH1	4	0	0	0	0	1	0	1	0	1	1	0	0	0
PSMD1	4	0	0	1	0	1	0	0	0	1	0	0	0	1
PTCD3	4	0	1	0	1	1	0	0	0	1	0	0	0	0
PTCHD1	4	1	0	0	1	0	0	0	0	0	1	0	0	1
PTGER4	4	0	1	0	0	0	0	0	1	1	1	0	0	0
PTGES3	4	0	1	1	0	1	0	0	0	0	0	0	0	1
PTHLH	4	0	1	0	0	0	0	0	0	1	1	0	1	0
PTP4A2	4	1	1	0	0	0	0	0	1	0	0	0	0	1
PTPDC1	4	0	1	0	0	0	0	0	1	1	1	0	0	0
PTPN9	4	1	0	0	0	0	0	0	1	1	1	0	0	0
PTPRB	4	1	0	1	0	0	0	0	1	1	0	0	0	0
PTPRG	4	1	0	1	0	0	0	0	1	0	0	0	1	0
PTPRK	4	0	0	1	0	0	0	1	0	1	0	0	1	0
PTPRT	4	0	1	0	0	0	0	0	1	0	1	0	0	1
PTTG1IP	4	0	0	0	0	0	1	0	0	0	1	1	1	0
PUM2	4	1	1	1	0	0	0	0	1	0	0	0	0	0
PURG	4	0	0	1	0	0	0	0	1	0	0	1	1	0
PXN	4	0	0	0	1	0	0	1	0	1	1	0	0	0
PXYLP1	4	0	1	1	0	0	0	0	0	0	0	1	1	0
QSER1	4	0	0	1	0	1	0	0	1	0	0	0	0	1
R3HDM4	4	0	0	1	0	0	0	0	0	1	0	1	1	0
RAB11FIP4	4	1	1	0	0	1	0	1	0	0	0	0	0	0
RAB11FIP5	4	0	1	0	0	1	0	1	0	0	1	0	0	0
RAB21	4	0	0	0	0	0	0	0	1	1	1	1	0	0
RAB27B	4	1	1	0	0	0	1	0	0	1	0	0	0	0
RAB40C	4	1	0	0	0	1	0	0	0	0	0	1	1	0
RABGAP1	4	0	0	0	1	1	1	0	0	0	1	0	0	0
RACGAP1	4	0	1	1	1	0	1	0	0	0	0	0	0	0
RAD21	4	0	1	0	0	0	1	1	1	0	0	0	0	0
RALA	4	0	0	1	0	0	0	0	0	1	0	1	1	0
RALGAPB	4	1	0	0	1	0	0	1	0	0	0	0	0	1
RALGPS2	4	0	0	1	1	0	1	0	0	0	0	0	0	1
RAP2C	4	1	1	1	0	0	0	0	0	1	0	0	0	0
RAPGEF5	4	1	1	0	1	0	0	0	0	0	0	0	0	1
RAPGEFL1	4	0	1	0	0	0	0	1	0	0	0	1	1	0
RARB	4	0	1	0	1	0	0	0	0	0	0	1	1	0
RBBP9	4	0	0	0	0	1	0	0	0	1	0	0	1	1
RBL1	4	0	1	0	1	0	0	1	0	1	0	0	0	0
RBM23	4	0	0	0	0	1	0	0	0	1	0	1	1	0
RBM27	4	0	0	1	0	0	1	0	1	1	0	0	0	0
RBM4	4	1	0	1	1	0	0	1	0	0	0	0	0	0
RBM8A	4	0	1	0	0	0	0	0	0	1	0	0	1	1
RCHY1	4	0	1	0	0	0	0	0	1	1	0	0	0	1
RELA	4	0	0	0	0	0	0	1	0	1	0	1	1	0
REV3L	4	0	1	0	0	1	0	0	0	0	0	1	1	0
RHOBTB1	4	0	0	0	0	1	0	0	0	0	1	1	1	0
RIC1	4	1	0	0	1	0	0	0	0	0	0	1	1	0
RIMKLA	4	1	1	0	0	0	1	0	1	0	0	0	0	0
RIMS4	4	0	0	0	1	0	0	1	0	0	1	0	0	1
RNF138	4	0	0	0	0	0	0	0	1	1	0	1	1	0
RNF152	4	1	0	0	0	0	0	0	0	0	1	1	1	0
RNF2	4	0	1	1	0	0	0	0	1	1	0	0	0	0
RNF4	4	0	1	0	1	0	0	0	1	0	0	0	0	1
ROCK2	4	0	1	1	0	0	0	1	0	0	1	0	0	0
ROR1	4	0	0	0	1	0	0	0	0	1	1	1	0	0
RP2	4	1	1	0	0	0	0	1	1	0	0	0	0	0
RPA1	4	1	0	0	0	0	0	0	1	0	0	1	1	0
RPIA	4	1	1	0	0	0	0	0	1	0	1	0	0	0
RPL27A	4	0	0	0	1	0	0	1	1	0	1	0	0	0
RPRD2	4	0	1	1	0	0	0	0	1	1	0	0	0	0
RRAGD	4	1	1	1	0	0	0	0	0	0	1	0	0	0
RRM2	4	1	1	0	0	0	0	0	0	1	1	0	0	0
RRP1B	4	1	0	0	0	0	0	1	0	1	0	0	0	1
RSBN1L	4	0	0	0	0	1	1	0	0	1	1	0	0	0
RTKN2	4	0	1	0	0	0	1	1	0	0	1	0	0	0
S1PR1	4	0	1	0	0	1	0	0	0	1	1	0	0	0
SAR1B	4	0	1	1	0	0	0	0	0	0	1	0	0	1
SCAI	4	1	0	0	0	0	0	0	0	0	1	1	1	0
SCAMP5	4	0	1	0	0	0	0	0	0	1	0	1	1	0
SCN3A	4	0	1	1	0	0	1	0	0	1	0	0	0	0
SCYL2	4	1	0	0	0	0	0	0	0	0	1	1	1	0
SDR42E1	4	1	0	1	1	0	0	0	1	0	0	0	0	0
SEC11A	4	1	0	0	0	0	0	0	0	1	0	1	1	0
SEC16A	4	0	1	1	1	0	0	0	0	0	1	0	0	0
SENP2	4	1	0	0	0	0	1	0	0	1	1	0	0	0
SEPHS1	4	0	1	0	0	0	0	1	0	0	0	1	1	0
SERINC1	4	0	1	0	0	0	0	0	1	1	0	0	0	1
SERP1	4	1	1	0	0	0	0	0	0	0	1	0	1	0
SERPINB9	4	1	0	0	1	0	0	0	0	0	0	1	1	0
SERPINH1	4	0	0	0	0	0	0	0	0	1	1	1	1	0
SET	4	0	0	0	1	0	0	0	1	0	0	1	1	0
SETX	4	1	1	0	0	0	0	0	0	1	1	0	0	0
SFMBT1	4	1	1	1	1	0	0	0	0	0	0	0	0	0
SFPQ	4	0	0	1	0	0	1	0	0	0	0	1	1	0
SFXN1	4	0	0	1	0	1	0	1	0	0	1	0	0	0
SGK1	4	0	0	0	0	0	0	0	1	0	1	1	1	0
SGMS1	4	0	1	1	0	1	0	0	0	0	1	0	0	0
SH2B3	4	1	0	0	0	1	1	0	0	1	0	0	0	0
SH3BGRL2	4	1	0	0	0	0	0	0	0	0	1	1	1	0
SH3BP5	4	0	1	1	0	0	0	0	1	1	0	0	0	0
SH3GLB1	4	1	1	0	0	0	0	0	0	0	0	1	1	0
SH3GLB2	4	0	0	0	0	0	0	0	0	0	1	1	1	1
SHANK2	4	0	1	1	0	0	0	0	1	1	0	0	0	0
SHE	4	0	0	1	0	0	0	0	0	1	1	0	0	1
SHROOM3	4	0	1	0	0	1	0	0	1	1	0	0	0	0
SIRPA	4	0	1	0	0	0	0	0	1	1	0	0	0	1
SKA2	4	0	0	0	1	0	0	0	1	0	1	0	0	1
SKP1	4	0	0	1	0	1	0	0	0	1	0	0	0	1
SLC10A7	4	1	1	0	0	0	0	1	0	0	1	0	0	0
SLC11A2	4	1	1	0	0	0	0	0	1	1	0	0	0	0
SLC12A7	4	1	0	1	0	1	0	0	0	0	1	0	0	0
SLC19A1	4	0	0	0	0	0	0	0	1	1	0	1	1	0
SLC19A2	4	1	0	0	0	0	1	0	0	1	0	0	1	0
SLC20A1	4	1	0	0	0	0	0	0	1	1	1	0	0	0
SLC26A2	4	1	0	0	1	0	1	0	0	0	1	0	0	0
SLC2A1	4	1	0	0	0	1	0	1	0	0	0	0	0	1
SLC30A3	4	0	1	0	0	0	1	0	0	0	0	1	1	0
SLC35F3	4	0	1	1	0	0	1	0	0	0	1	0	0	0
SLC44A1	4	1	0	1	0	0	0	0	0	1	0	0	0	1
SLC6A14	4	1	0	0	0	0	0	0	1	0	0	1	1	0
SLC6A4	4	0	1	1	1	0	0	0	0	1	0	0	0	0
SLC7A5	4	0	0	0	0	1	0	1	0	0	1	0	0	1
SMAP1	4	1	0	1	0	1	0	1	0	0	0	0	0	0
SMARCC1	4	1	0	0	0	0	0	0	1	0	0	1	1	0
SMARCD1	4	1	0	0	0	1	0	1	0	1	0	0	0	0
SMS	4	0	0	0	0	1	0	0	1	0	0	1	1	0
SMURF1	4	0	1	0	0	0	0	1	0	0	1	0	1	0
SNAP91	4	0	0	0	0	1	0	1	0	0	0	1	1	0
SNIP1	4	0	0	1	0	0	0	0	0	1	0	1	1	0
SNX11	4	1	0	0	0	0	0	0	0	0	1	1	1	0
SNX19	4	0	0	0	0	0	0	1	0	1	1	0	0	1
SNX8	4	0	1	0	0	0	0	1	0	0	0	1	1	0
SOAT1	4	1	0	0	0	0	1	0	0	0	1	0	0	1
SOBP	4	1	1	1	0	0	0	0	0	0	0	0	0	1
SORL1	4	0	1	0	1	0	0	1	0	0	1	0	0	0
SOX6	4	1	0	0	0	0	0	0	1	1	0	0	0	1
SPAG9	4	0	1	0	0	0	1	0	0	1	1	0	0	0
SPARC	4	0	0	0	0	0	1	1	0	0	0	1	1	0
SPCS3	4	1	1	0	0	0	1	0	1	0	0	0	0	0
SPECC1L	4	0	1	0	0	0	0	1	1	1	0	0	0	0
SPIRE1	4	0	0	1	0	1	0	1	0	1	0	0	0	0
SPRED1	4	0	1	1	0	1	0	0	0	1	0	0	0	0
SPSB4	4	0	1	0	0	0	0	0	1	0	0	1	1	0
SPTAN1	4	0	0	0	0	0	0	1	0	0	0	1	1	1
SQSTM1	4	1	1	0	1	1	0	0	0	0	0	0	0	0
SRCIN1	4	0	1	1	0	1	0	0	0	1	0	0	0	0
SREK1	4	1	1	0	1	0	0	0	0	0	1	0	0	0
SREK1IP1	4	1	1	0	0	0	0	0	1	0	1	0	0	0
SRPRB	4	1	0	1	1	0	0	0	0	0	0	0	1	0
SRRM4	4	1	0	0	0	0	0	0	1	1	0	0	0	1
SRSF11	4	1	0	0	0	1	0	0	0	0	0	1	1	0
SS18	4	0	0	0	1	0	1	0	1	0	1	0	0	0
SS18L1	4	0	1	0	0	0	0	0	0	0	1	1	1	0
SSBP2	4	1	0	0	0	1	0	0	1	0	1	0	0	0
ST8SIA3	4	0	1	1	1	1	0	0	0	0	0	0	0	0
STARD5	4	0	0	0	1	1	0	0	1	1	0	0	0	0
STARD7	4	0	0	0	1	0	0	0	1	0	1	0	0	1
STK40	4	1	0	0	1	0	0	0	0	1	0	0	1	0
STX12	4	0	1	0	1	0	0	0	1	1	0	0	0	0
STX17	4	1	0	0	0	0	0	0	1	0	0	1	1	0
STXBP4	4	0	1	0	0	0	1	1	1	0	0	0	0	0
SUB1	4	1	0	0	0	0	0	0	0	0	1	1	1	0
SUCO	4	0	1	0	0	0	0	0	1	0	1	0	0	1
SUFU	4	0	0	0	0	0	0	0	0	1	0	1	1	1
SUGT1	4	1	0	1	0	0	0	1	0	1	0	0	0	0
SUN1	4	0	0	0	0	1	0	0	0	1	0	1	1	0
SUN2	4	0	0	1	0	0	0	1	0	1	1	0	0	0
SVIL	4	1	0	0	0	1	0	0	0	0	0	1	1	0
SWAP70	4	0	0	0	0	0	0	1	1	0	0	1	1	0
SYT2	4	1	0	0	0	0	0	0	1	1	0	0	0	1
SYT4	4	0	1	0	0	0	0	1	1	0	1	0	0	0
SYT6	4	0	0	1	0	1	0	1	0	1	0	0	0	0
TADA2B	4	0	1	0	0	0	0	0	0	1	0	1	1	0
TAF5L	4	0	0	1	0	1	0	0	0	0	1	0	0	1
TAF9B	4	1	0	0	1	0	1	0	1	0	0	0	0	0
TBC1D13	4	1	0	1	0	1	0	0	0	1	0	0	0	0
TBC1D16	4	0	0	0	1	0	0	1	0	1	0	0	0	1
TBC1D20	4	1	1	0	1	0	0	0	0	1	0	0	0	0
[truncated: 7,390 more rows]
